# Supplementary material
Source: publisher site journal article supplement (https://www.spandidos-publications.com/1484/downloadSupplementary)
Supplement: Supplementary file 1 [file downloadSupplementary]

## Sheet: GO
Table SI. GO functional enrichment analyses in Wilms Tumor.
ONTOLOGY	ID	Description	GeneRatio	BgRatio	P-value	p-adjust	q-value	Gene ID	Count
BP	GO:0006261	DNA-dependent DNA replication	80/4196	154/19623	5.84e-17	3.73e-13	2.93e-13	EME1/CDC6/MCM6/PARP3/DACH1/RAD51/MCM7/MCM2/MCM10/ORC1/POLQ/E2F7/MCM4/SMC3/BCL6/PARP1/CDC45/BLM/WDHD1/TOPBP1/DSCC1/CDK2/GINS1/TICRR/PRIM2/CDC7/ORC6/CCNE2/MMS22L/ZRANB3/CDT1/DNA2/ALYREF/RFC4/RFC3/BRCA2/RFC2/MCM3/NUCKS1/E2F8/DONSON/GINS2/TIMELESS/CHEK2/GINS4/POLD4/RNASEH2A/POLE3/POLE/RRM2B/DBF4B/TONSL/PCNA/GINS3/SMC1A/PRIM1/BAZ1A/POLE2/RFC5/BMP6/FGFR1/WRN/POLA1/CHTF18/MCM8/FEN1/LIG1/DDX11/POLD3/LIG3…	80
BP	GO:0006260	DNA replication	129/4196	310/19623	4.87e-16	1.55e-12	1.22e-12	CCDC88A/EME1/NAP1L1/RBBP4/CDC25C/CDC6/MCM6/BRIP1/PARP3/DTL/KITLG/DACH1/EXO1/RAD51/MCM7/PDGFB/PIF1/MCM2/MCM10/PCLAF/ORC1/CDK1/POLQ/E2F7/MCM4/SMC3/BCL6/ESCO2/PARP1/TGFB1/CDC45/BLM/RRM2/WDHD1/RECQL5/BARD1/TOPBP1/DSCC1/CDK2/SIRT1/GINS1/TOP1/TICRR/TNFAIP1/PRIM2/CDC7/ORC6/CCNE2/MMS22L/SET/ZRANB3/CDT1/DNA2/CDC25A/BRCA1/ALYREF/RFC4/RFC3/BRCA2/RFC2/MCM3/CHEK1/NUCKS1/E2F8/DONSON/GINS2/TIMELESS/CHEK2/RRM1/G…	129
BP	GO:0007059	chromosome segregation	150/4196	383/19623	1.16e-15	2.25e-12	1.76e-12	TOP2A/NUSAP1/EME1/KIF11/HJURP/SKA3/SPAG5/CENPA/CDC6/NCAPG/BUB1B/CENPI/BUB1/NEK8/BRIP1/NDC80/TTK/CENPF/BIRC5/CDC20/SKA1/NCAPH/KIF18B/SGO1/KIF14/CENPE/TRIP13/AURKB/FAM83D/NEK2/PRC1/ERCC6L/RACGAP1/KNL1/DLGAP5/PPP1CC/KIFC1/CDCA8/NCAPD2/PSRC1/SPC25/OIP5/KIF4A/SPC24/XPO1/PTTG1/KIF2C/SMC3/TACC3/ESCO2/KIF18A/CDCA5/CENPH/ZWINT/SLF1/SPDL1/NUF2/CCNB1/RECQL5/KNSTRN/UBE2C/RAD21/SRPK1/CENPU/CENPP/HASPIN/ZWILCH…	150
BP	GO:0000819	sister chromatid segregation	109/4196	249/19623	1.41e-15	2.25e-12	1.76e-12	TOP2A/NUSAP1/SPAG5/CENPA/CDC6/NCAPG/BUB1B/CENPI/BUB1/NDC80/TTK/CENPF/BIRC5/CDC20/SKA1/NCAPH/KIF18B/SGO1/KIF14/CENPE/TRIP13/AURKB/NEK2/PRC1/ERCC6L/RACGAP1/KNL1/DLGAP5/PPP1CC/KIFC1/CDCA8/NCAPD2/PSRC1/SPC25/KIF4A/SPC24/XPO1/PTTG1/KIF2C/SMC3/TACC3/KIF18A/CDCA5/CENPH/ZWINT/SLF1/SPDL1/NUF2/CCNB1/KNSTRN/UBE2C/RAD21/CENPU/CENPP/HASPIN/ZWILCH/DSCC1/MAD2L1/NUP107/PLK1/KIF22/SGO2/KIF23/SMC2/KNTC1/CKAP5/CENP…	109
BP	GO:0140014	mitotic nuclear division	117/4196	291/19623	1.97e-13	2.52e-10	1.98e-10	EDN1/NUSAP1/BIRC3/IGF2/TPX2/KIF11/SPAG5/CDC25C/CDC6/NCAPG/BUB1B/BUB1/NDC80/TTK/CENPF/BIRC5/CDC20/SPAST/NCAPH/KIF18B/SGO1/KIF14/CENPE/TRIP13/AURKB/PDGFB/MYBL2/NEK2/PRC1/RACGAP1/DLGAP5/KIFC1/CDCA8/NCAPD2/PSRC1/KIF4A/MTBP/PTTG1/KIF2C/SMC3/TACC3/KIF18A/CDCA5/TGFB1/ZWINT/SLF1/SPDL1/NUF2/ANLN/CCNB1/KIF20B/FBXO5/KNSTRN/UBE2C/FGF8/RAD21/FBXO43/RANBP1/HASPIN/DSCC1/MAD2L1/PKMYT1/PLK1/AURKA/UBE2S/MKI67/KIF2…	117
BP	GO:0098813	nuclear chromosome segregation	129/4196	333/19623	2.98e-13	3.17e-10	2.49e-10	TOP2A/NUSAP1/EME1/SPAG5/CENPA/CDC6/NCAPG/BUB1B/CENPI/BUB1/BRIP1/NDC80/TTK/CENPF/BIRC5/CDC20/SKA1/NCAPH/KIF18B/SGO1/KIF14/CENPE/TRIP13/AURKB/FAM83D/NEK2/PRC1/ERCC6L/RACGAP1/KNL1/DLGAP5/PPP1CC/KIFC1/CDCA8/NCAPD2/PSRC1/SPC25/KIF4A/SPC24/XPO1/PTTG1/KIF2C/SMC3/TACC3/KIF18A/CDCA5/CENPH/ZWINT/SLF1/SPDL1/NUF2/CCNB1/KNSTRN/UBE2C/RAD21/CENPU/CENPP/HASPIN/ZWILCH/DSCC1/MAD2L1/NUP107/PLK1/SYCE2/KIF22/SGO2/KIF…	129
BP	GO:0007062	sister chromatid cohesion	67/4196	141/19623	4.37e-12	3.99e-09	3.13e-09	CENPA/BUB1B/CENPI/BUB1/NDC80/CENPF/BIRC5/CDC20/SKA1/SGO1/CENPE/AURKB/ERCC6L/KNL1/PPP1CC/CDCA8/SPC25/SPC24/XPO1/KIF2C/SMC3/KIF18A/CDCA5/CENPH/ZWINT/SLF1/SPDL1/NUF2/RAD21/CENPU/CENPP/HASPIN/ZWILCH/DSCC1/MAD2L1/NUP107/PLK1/KIF22/SGO2/KNTC1/CKAP5/CENPM/SKA2/NUP160/CENPK/CENPL/ESPL1/DSN1/CENPO/BOD1/CTNNB1/PDS5B/H2AFY/KIF2A/TNKS/SLF2/SMC1A/RCC2/CENPQ/NUP133/FEN1/DDX11/DYNC1LI1/CENPN/NSL1/INCENP/ITGB3BP	67
BP	GO:0000070	mitotic sister chromatid segregation	71/4196	155/19623	9.07e-12	7.23e-09	5.68e-09	NUSAP1/SPAG5/CDC6/NCAPG/BUB1B/BUB1/NDC80/TTK/CENPF/CDC20/NCAPH/KIF18B/SGO1/KIF14/CENPE/TRIP13/AURKB/NEK2/PRC1/RACGAP1/DLGAP5/KIFC1/CDCA8/NCAPD2/PSRC1/KIF4A/PTTG1/KIF2C/TACC3/KIF18A/CDCA5/ZWINT/SLF1/SPDL1/NUF2/CCNB1/KNSTRN/UBE2C/RAD21/HASPIN/DSCC1/MAD2L1/PLK1/KIF22/KIF23/SMC2/CDT1/KPNB1/DUSP1/CHMP2A/SMC4/ESPL1/DSN1/GEN1/BOD1/PDS5B/H2AFY/RAN/TNKS/SLF2/SMC1A/NCAPD3/CHAMP1/DYNC1LI1/MAD2L2/CDK5RAP2/AN…	71
BP	GO:0000280	nuclear division	153/4196	453/19623	4.79e-10	3.08e-07	2.42e-07	EDN1/TOP2A/NUSAP1/BIRC3/C11orf80/IGF2/TPX2/EME1/KIF11/SPAG5/CDC25C/CDC6/NCAPG/BUB1B/BUB1/BRIP1/NDC80/TTK/CENPF/BIRC5/CDC20/SPAST/NCAPH/KIF18B/SGO1/KIF14/HSPA2/RAD51/CENPE/TRIP13/AURKB/PDGFB/MYBL2/NEK2/PRC1/RACGAP1/MND1/DLGAP5/KIFC1/CDCA8/NCAPD2/PSRC1/ASPM/KIF4A/MTBP/PTTG1/KIF2C/SMC3/TACC3/KIF18A/CDCA5/TGFB1/MSH2/ZWINT/SLF1/XRCC2/SPDL1/NUF2/ANLN/CCNB1/KIF20B/FBXO5/KNSTRN/UBE2C/FGF8/RAD21/FBXO43/RA…	153
BP	GO:0001822	kidney development	106/4196	284/19623	4.83e-10	3.08e-07	2.42e-07	TEK/WNK4/CTSH/CA2/SOX11/FSTL3/LRRK2/ACAT1/GATA3/ARG2/COL4A4/HNF1B/GCNT4/SIX1/EYA1/SDC4/SIX2/CENPF/GPR4/PDGFB/TGFB1/SMAD5/FGF1/FGF8/CFLAR/HYAL2/GLIS2/PKD2/KLF15/LIF/NPNT/ADAMTS16/FOXJ1/CAT/PYGO1/PRKX/SIX4/AKR1B1/IRX3/GDF11/ACVR2B/ZBTB16/PBX1/SDC1/CTNNB1/VANGL2/ADAMTS1/ROBO2/OVOL1/RRM2B/EGR1/SMAD9/ITGA3/CITED1/BMP6/HAS2/FGFR1/SIM1/GLI3/KIF26B/PPAT/SLIT2/LAMA5/CD34/BMP7/PCSK5/LGR4/PECAM1/EPCAM/TFAP2…	106
BP	GO:0072001	renal system development	110/4196	300/19623	7.61e-10	4.2e-07	3.3e-07	TEK/WNK4/CTSH/ITGB4/CA2/SOX11/FSTL3/LRRK2/ACAT1/GATA3/ARG2/COL4A4/HNF1B/GCNT4/SIX1/EYA1/SDC4/SIX2/SOX17/CENPF/GPR4/CEP55/PDGFB/TGFB1/SMAD5/FGF1/FGF8/CFLAR/HYAL2/GLIS2/PKD2/KLF15/LIF/NPNT/ADAMTS16/FOXJ1/CAT/PYGO1/PRKX/SIX4/AKR1B1/IRX3/GDF11/ACVR2B/ZBTB16/PBX1/SDC1/CTNNB1/VANGL2/ADAMTS1/ROBO2/OVOL1/RRM2B/EGR1/SMAD9/ITGA3/CITED1/BMP6/HAS2/FGFR1/SIM1/GLI3/KIF26B/PPAT/SLIT2/LAMA5/CD34/BMP7/PCSK5/LGR4/…	110
BP	GO:0006270	DNA replication initiation	28/4196	43/19623	7.9e-10	4.2e-07	3.3e-07	CDC6/MCM6/MCM7/MCM2/MCM10/ORC1/MCM4/CDC45/TOPBP1/CDK2/TICRR/PRIM2/CDC7/ORC6/CCNE2/CDT1/MCM3/GINS2/GINS4/POLE3/POLE/PRIM1/POLE2/POLA1/MCM8/POLA2/CCNE1/MCM5	28
BP	GO:0044786	cell cycle DNA replication	35/4196	61/19623	9.64e-10	4.73e-07	3.71e-07	DACH1/RAD51/E2F7/SMC3/BCL6/CDC45/GINS1/PRIM2/CDC7/CDT1/DNA2/RFC4/RFC3/BRCA2/RFC2/E2F8/DONSON/GINS2/CHEK2/POLD4/POLE3/POLE/DBF4B/PCNA/SMC1A/PRIM1/POLE2/RFC5/FGFR1/POLA1/FEN1/LIG1/POLD3/POLD1/POLA2	35
BP	GO:0051052	regulation of DNA metabolic process	145/4196	430/19623	1.54e-09	7e-07	5.49e-07	TNFSF13/PTK2B/CCDC88A/GATA3/EYA1/GPER1/DEK/CD40/CDC6/PPARG/HNRNPA1/PARP3/KITLG/PPARGC1A/MSH6/KPNA2/DACH1/UHRF1/RAD51/AURKB/PDGFB/NEK2/PIF1/GDF1/HMGB1/CDK1/POLQ/E2F7/GNL3/SMC3/BCL6/ESCO2/PARP1/TGFB1/MSH2/CLCF1/SLF1/USP1/BLM/RECQL5/NPM1/BABAM2/FAM129B/PRKCQ/DSCC1/RAD51AP1/MAPK3/CDK2/TET1/SIRT1/KLF4/TICRR/TNFAIP1/AIFM1/CDC7/DNMT1/ZRANB3/CDT1/DNA2/PARPBP/CYREN/ENDOG/DUSP1/BRCA1/ALYREF/KDM1A/ATAD5/NSD…	145
BP	GO:0033260	nuclear DNA replication	31/4196	52/19623	2.4e-09	1.02e-06	8.01e-07	DACH1/RAD51/BCL6/CDC45/GINS1/PRIM2/CDC7/CDT1/DNA2/RFC4/RFC3/BRCA2/RFC2/DONSON/GINS2/CHEK2/POLD4/POLE3/POLE/DBF4B/PCNA/PRIM1/POLE2/RFC5/FGFR1/POLA1/FEN1/LIG1/POLD3/POLD1/POLA2	31
BP	GO:0001655	urogenital system development	118/4196	337/19623	4.47e-09	1.78e-06	1.4e-06	TEK/WNK4/GATA2/CTSH/ITGB4/CA2/SOX11/FSTL3/LRRK2/ACAT1/GATA3/ARG2/COL4A4/HNF1B/GCNT4/SIX1/EYA1/SDC4/SIX2/SOX17/CENPF/GPR4/CEP55/PDGFB/TGFB1/SMAD5/FGF1/SMARCC1/FGF8/CFLAR/HYAL2/GLIS2/PKD2/KLF15/LIF/NPNT/ADAMTS16/FOXJ1/CAT/PYGO1/PRKX/SIX4/AKR1B1/IRX3/GDF11/ACVR2B/ZBTB16/PBX1/SDC1/CTNNB1/VANGL2/ADAMTS1/ROBO2/OVOL1/RRM2B/EGR1/SMAD9/PSAP/ITGA3/CITED1/BMP6/HAS2/FGFR1/SIM1/GLI3/KIF26B/PPAT/SLIT2/EPHB3/LA…	118
BP	GO:0072073	kidney epithelium development	63/4196	149/19623	6.89e-09	2.58e-06	2.03e-06	WNK4/ACAT1/GATA3/ARG2/HNF1B/SIX1/EYA1/SDC4/SIX2/TGFB1/SMAD5/FGF1/FGF8/PKD2/KLF15/LIF/NPNT/ADAMTS16/FOXJ1/CAT/SIX4/IRX3/GDF11/PBX1/SDC1/CTNNB1/ROBO2/SMAD9/CITED1/FGFR1/SIM1/GLI3/KIF26B/SLIT2/LAMA5/CD34/BMP7/LGR4/PECAM1/EPCAM/STAT1/POU3F3/PODXL/IQGAP1/PROM1/OSR1/CD24/WT1/LAMB2/MAGI2/BMPER/GDNF/SALL1/FOXC2/HOXA11/VEGFA/PGF/HOXB7/DCHS1/WNT11/GREM1/MYO1E/FOXD1	63
BP	GO:0071897	DNA biosynthetic process	83/4196	218/19623	1.25e-08	4.43e-06	3.48e-06	PTK2B/PPARG/HNRNPA1/TYMS/BRIP1/DTL/CENPF/DACH1/EXO1/RAD51/AURKB/PDGFB/NEK2/PIF1/GDF1/PCLAF/POLQ/XRCC2/BLM/FAM129B/PRKCQ/BARD1/DSCC1/RAD51AP1/MAPK3/SIRT1/KLF4/PRIM2/DNA2/LIN9/DUSP1/BRCA1/CCT2/RFC4/CCT4/RFC3/BRCA2/TK2/RFC2/POLD4/UBA7/CTNNB1/POLE3/POLE/TNKS/HSP90AB1/DCP2/TCP1/CCT5/PCNA/CCT6A/POLE2/RFC5/RMI2/CCT3/WRN/ACVRL1/KCNK2/NVL/POLA1/CHTF18/RMI1/LIG1/RGCC/POLD3/LIG3/POLD1/MAD2L2/POLA2/GJA1/UBC/…	83
BP	GO:0051983	regulation of chromosome segregation	47/4196	101/19623	1.52e-08	5.12e-06	4.02e-06	SPAG5/CDC6/BUB1B/BUB1/NDC80/TTK/CENPF/CENPE/TRIP13/AURKB/NEK2/RACGAP1/DLGAP5/PTTG1/KIF2C/TACC3/CDCA5/SLF1/CCNB1/KNSTRN/UBE2C/RAD21/MAD2L1/PLK1/MKI67/CDT1/DUSP1/ECT2/ESPL1/RAD18/GEN1/CTNNB1/H2AFY/TNKS/SLF2/RCC2/RMI2/SMC6/FEN1/DDX11/DYNC1LI1/MAD2L2/CDK5RAP2/ANAPC1/TPR/SIRT2/NEK6	47
BP	GO:0006338	chromatin remodeling	76/4196	196/19623	2.04e-08	6.51e-06	5.11e-06	GATA3/HDAC2/PADI2/HJURP/DEK/RBBP4/CENPA/CENPI/MYB/SP140L/HMGB3/KNL1/HMGB1/OIP5/CENPH/HMGB2/SUV39H2/NPM1/SMARCC1/CENPU/CENPP/SMARCE1/HELLS/TOP1/PBRM1/MIS18BP1/CENPM/ANP32B/CHD7/CENPK/CENPL/HMGA2/CBX3/HMGXB4/CHEK1/ANP32A/SP100/CENPO/TADA2B/NASP/CTNNB1/ACTL6A/SMARCAD1/CHD1/CENPV/KAT2B/CENPQ/MIS18A/BAZ1A/CENPW/SSRP1/SATB2/SMARCD1/SMARCA5/SMARCB1/PSME4/VPS72/CHD1L/CECR2/BAZ1B/ARID1A/CENPN/ANP32E/TOX3/…	76
BP	GO:0007088	regulation of mitotic nuclear division	68/4196	171/19623	3.49e-08	1.06e-05	8.32e-06	EDN1/NUSAP1/IGF2/KIF11/CDC25C/CDC6/BUB1B/BUB1/NDC80/TTK/CENPF/CENPE/TRIP13/PDGFB/NEK2/DLGAP5/MTBP/PTTG1/SMC3/TACC3/CDCA5/TGFB1/SLF1/ANLN/CCNB1/KIF20B/FBXO5/UBE2C/FGF8/RAD21/FBXO43/RANBP1/MAD2L1/PKMYT1/PLK1/AURKA/MKI67/TOM1L2/KNTC1/CDT1/BORA/DUSP1/CHMP2A/CAV2/TOM1L1/ESPL1/BTC/PHIP/CHEK1/GEN1/H2AFY/TNKS/SLF2/SMC1A/CEP97/BMP7/CCSAP/RGCC/DYNC1LI1/MAD2L2/RCC1/CDK5RAP2/ANAPC1/CEP85/PDXP/TPR/SIRT2/NEK6	68
BP	GO:0006271	DNA strand elongation involved in DNA replication	16/4196	20/19623	3.7e-08	1.07e-05	8.42e-06	PARP3/PARP1/GINS1/DNA2/RFC4/RFC3/GINS2/GINS4/RNASEH2A/POLE/PCNA/GINS3/POLA1/FEN1/LIG1/LIG3	16
BP	GO:0001657	ureteric bud development	47/4196	104/19623	4.74e-08	1.29e-05	1.01e-05	GATA3/ARG2/HNF1B/SIX1/EYA1/SDC4/SIX2/TGFB1/SMAD5/FGF1/FGF8/PKD2/NPNT/ADAMTS16/FOXJ1/CAT/SIX4/GDF11/PBX1/SDC1/CTNNB1/ROBO2/SMAD9/CITED1/FGFR1/SIM1/GLI3/KIF26B/SLIT2/LAMA5/BMP7/LGR4/EPCAM/OSR1/WT1/BMPER/GDNF/SALL1/FOXC2/HOXA11/VEGFA/PGF/HOXB7/DCHS1/WNT11/GREM1/FOXD1	47
BP	GO:0097485	neuron projection guidance	93/4196	259/19623	4.86e-08	1.29e-05	1.01e-05	RAP1GAP/NTN4/SEMA4A/ROBO1/ENAH/GATA3/B3GNT2/NCAM1/L1CAM/CHN1/CYFIP2/FZD3/ROBO3/SEMA3G/FGF8/FAM129B/NR4A3/PRKCQ/MAPK3/VASP/SPTBN2/EZR/CDK5R1/EGR2/APP/BMPR1B/PIK3CB/SLIT1/FYN/SEMA3B/DOK5/UNC5B/VANGL2/DRAXIN/ROBO2/GFRA1/EVL/EFNA1/ETV1/ERBB2/TUBB2B/UNC5A/DOK4/GLI3/PLCG1/SEMA4D/SLIT2/GBX2/EPHB3/CXCR4/SEMA6A/GRB7/SHANK3/BMP7/NEO1/UNC5C/EFNA3/SEMA3C/BOC/NRXN1/GFRA3/NRCAM/DPYSL5/LAMB2/NGFR/SH3KBP1/SCN1B/…	93
BP	GO:0007411	axon guidance	92/4196	257/19623	6.75e-08	1.61e-05	1.26e-05	RAP1GAP/NTN4/SEMA4A/ROBO1/ENAH/GATA3/B3GNT2/NCAM1/L1CAM/CHN1/CYFIP2/FZD3/ROBO3/SEMA3G/FGF8/FAM129B/NR4A3/PRKCQ/MAPK3/VASP/SPTBN2/EZR/CDK5R1/EGR2/APP/BMPR1B/PIK3CB/SLIT1/FYN/SEMA3B/DOK5/UNC5B/VANGL2/DRAXIN/ROBO2/GFRA1/EVL/EFNA1/ETV1/ERBB2/TUBB2B/UNC5A/DOK4/GLI3/PLCG1/SEMA4D/SLIT2/GBX2/EPHB3/CXCR4/SEMA6A/GRB7/SHANK3/BMP7/NEO1/UNC5C/EFNA3/SEMA3C/BOC/NRXN1/GFRA3/NRCAM/DPYSL5/LAMB2/NGFR/SH3KBP1/SCN1B/…	92
BP	GO:0072163	mesonephric epithelium development	47/4196	105/19623	6.81e-08	1.61e-05	1.26e-05	GATA3/ARG2/HNF1B/SIX1/EYA1/SDC4/SIX2/TGFB1/SMAD5/FGF1/FGF8/PKD2/NPNT/ADAMTS16/FOXJ1/CAT/SIX4/GDF11/PBX1/SDC1/CTNNB1/ROBO2/SMAD9/CITED1/FGFR1/SIM1/GLI3/KIF26B/SLIT2/LAMA5/BMP7/LGR4/EPCAM/OSR1/WT1/BMPER/GDNF/SALL1/FOXC2/HOXA11/VEGFA/PGF/HOXB7/DCHS1/WNT11/GREM1/FOXD1	47
BP	GO:0072164	mesonephric tubule development	47/4196	105/19623	6.81e-08	1.61e-05	1.26e-05	GATA3/ARG2/HNF1B/SIX1/EYA1/SDC4/SIX2/TGFB1/SMAD5/FGF1/FGF8/PKD2/NPNT/ADAMTS16/FOXJ1/CAT/SIX4/GDF11/PBX1/SDC1/CTNNB1/ROBO2/SMAD9/CITED1/FGFR1/SIM1/GLI3/KIF26B/SLIT2/LAMA5/BMP7/LGR4/EPCAM/OSR1/WT1/BMPER/GDNF/SALL1/FOXC2/HOXA11/VEGFA/PGF/HOXB7/DCHS1/WNT11/GREM1/FOXD1	47
BP	GO:0044282	small molecule catabolic process	145/4196	454/19623	7.84e-08	1.74e-05	1.37e-05	HYAL1/HOGA1/RBKS/NOS3/CRYL1/ACADS/ACAT1/ACAA1/ARG2/ADHFE1/UPP1/IMPA2/ETFDH/ALDH1A1/NUDT7/HNMT/HMGCL/HEXA/ACADVL/PCCA/OXCT1/SHMT1/ADA2/HADHB/ACADSB/INPP5K/ALDH4A1/HIBADH/HMMR/TGFB1/CPT1A/PPARA/DPYD/AUH/GOT1/AMACR/MLYCD/IDNK/BPGM/DDAH1/GALM/LPIN3/PNP/HYAL2/GK5/PLA2G15/FAAH/ASRGL1/SCARF1/PNKD/PECR/GLS/CDO1/DECR1/ETFBKMT/PPM1K/ACOT4/SYNJ1/BDH1/GLUD1/MCCC2/GLDC/ENPP4/KHK/SDSL/HAGH/TKFC/ACAA2/SLC27A4/H…	145
BP	GO:0051188	cofactor biosynthetic process	110/4196	323/19623	7.91e-08	1.74e-05	1.37e-05	ACSL1/ACSL5/OGDHL/SPR/ACSS1/ELOVL7/GGT1/ACAT1/MAOB/PDXK/PFKFB3/PRKAG2/CNDP2/NMRK1/MPC1/GGT5/NFS1/ELOVL1/ALAD/PPARGC1A/ELOVL2/STAT3/ESRRB/HSD17B8/COQ10B/SCD/MOCS2/PDHA1/PPARA/TSPO/PTGS2/MLYCD/COQ9/NUP107/BPGM/NFE2L2/ALAS1/PNP/PRKAA2/NAPRT/SLC25A1/OPLAH/PARP10/RAE1/NUP58/NUP160/ACSL4/PNPO/IDH2/NUP205/SLC25A16/MOCS1/HAGH/NUP155/ATIC/GALK1/PSAT1/MPC2/NDC1/PCBD2/ELOVL5/NUP153/NNMT/PDK4/OGDH/PDP1/DHFR/…	110
BP	GO:0001823	mesonephros development	48/4196	109/19623	9.24e-08	1.85e-05	1.46e-05	GATA3/ARG2/HNF1B/SIX1/EYA1/SDC4/SIX2/TGFB1/SMAD5/FGF1/FGF8/PKD2/NPNT/ADAMTS16/FOXJ1/CAT/SIX4/GDF11/ZBTB16/PBX1/SDC1/CTNNB1/ROBO2/SMAD9/CITED1/FGFR1/SIM1/GLI3/KIF26B/SLIT2/LAMA5/BMP7/LGR4/EPCAM/OSR1/WT1/BMPER/GDNF/SALL1/FOXC2/HOXA11/VEGFA/PGF/HOXB7/DCHS1/WNT11/GREM1/FOXD1	48
BP	GO:0016054	organic acid catabolic process	101/4196	291/19623	9.3e-08	1.85e-05	1.46e-05	HYAL1/HOGA1/NOS3/CRYL1/ACADS/ACAT1/ACAA1/ARG2/ADHFE1/ETFDH/NUDT7/HNMT/HMGCL/HEXA/ACADVL/PCCA/SHMT1/HADHB/ACADSB/ALDH4A1/HIBADH/HMMR/TGFB1/CPT1A/PPARA/AUH/GOT1/AMACR/MLYCD/IDNK/DDAH1/LPIN3/HYAL2/PLA2G15/FAAH/ASRGL1/PECR/GLS/CDO1/DECR1/ETFBKMT/PPM1K/ACOT4/GLUD1/MCCC2/GLDC/SDSL/ACAA2/SLC27A4/HYKK/PHYKPL/CHP1/ETFB/ALDH6A1/PHYH/CEMIP2/ENOSF1/OGDH/ECH1/SCP2/SLC25A21/BCKDK/SLC27A2/MCEE/CYP39A1/DCXR/PEX7…	101
BP	GO:0046395	carboxylic acid catabolic process	101/4196	291/19623	9.3e-08	1.85e-05	1.46e-05	HYAL1/HOGA1/NOS3/CRYL1/ACADS/ACAT1/ACAA1/ARG2/ADHFE1/ETFDH/NUDT7/HNMT/HMGCL/HEXA/ACADVL/PCCA/SHMT1/HADHB/ACADSB/ALDH4A1/HIBADH/HMMR/TGFB1/CPT1A/PPARA/AUH/GOT1/AMACR/MLYCD/IDNK/DDAH1/LPIN3/HYAL2/PLA2G15/FAAH/ASRGL1/PECR/GLS/CDO1/DECR1/ETFBKMT/PPM1K/ACOT4/GLUD1/MCCC2/GLDC/SDSL/ACAA2/SLC27A4/HYKK/PHYKPL/CHP1/ETFB/ALDH6A1/PHYH/CEMIP2/ENOSF1/OGDH/ECH1/SCP2/SLC25A21/BCKDK/SLC27A2/MCEE/CYP39A1/DCXR/PEX7…	101
BP	GO:0061448	connective tissue development	90/4196	252/19623	1.05e-07	2.04e-05	1.6e-05	HYAL1/SCIN/EDN1/TRPM4/ESRRA/COL2A1/SLC39A13/ACAT1/SIX2/TRPV4/TYMS/PPARGC1A/GPR4/OXCT1/PDGFB/FGFR3/TGFB1/SELENOM/SMAD5/ZNF516/CFLAR/MAPK3/SIRT1/PKDCC/CSF1/PTH1R/TGFBR2/HYAL2/MEX3C/MYCN/BMPR1A/ITGB8/POC1A/FGF9/BMPR1B/HMGA2/THRA/ROR2/ZBTB16/EVC/CTNNB1/EGR1/SMAD9/UNCX/CYR61/SOX6/BMP6/HIF1A/SATB2/FGFR1/PLA2G16/GLI3/LRP6/ACVRL1/TBL1XR1/CDK4/CD34/BMP7/STC1/OSR1/WT1/COL27A1/PPARD/ADAMTS7/EFEMP1/SLC25A25/…	90
BP	GO:0046677	response to antibiotic	114/4196	340/19623	1.18e-07	2.22e-05	1.74e-05	HYAL1/EDN1/CIITA/PTK2B/ZC3H12A/LRRK2/KLF2/MAOB/ICAM1/GATA3/IL18BP/HDAC2/BCL2L1/AQP1/HNRNPA1/MAPK13/TYMS/ALAD/CRYAB/OXCT1/STAT3/MYB/PDGFB/CDK1/ND4/CLDN7/NR4A3/DNMT3A/NFE2L2/EZH2/SIRT1/KLF4/CYTB/TBXA2R/HYAL2/AIFM1/MAP1LC3A/AHR/ND5/ADCYAP1R1/ENDOG/DUSP1/ECT2/KDM1A/CDO1/CAT/SDF4/APEX1/KPNA4/ND6/FYN/TIMELESS/KDM5B/SDC1/STAT6/CASP8/GSTP1/NQO1/PINK1/HBA2/EGR1/CLU/FECH/RHOB/PCNA/PSAP/MAP3K5/CLDN1/PLA2G4A…	114
BP	GO:0046394	carboxylic acid biosynthetic process	141/4196	442/19623	1.28e-07	2.33e-05	1.83e-05	HYAL1/CEACAM1/EDN1/HOGA1/OGDHL/ACSS1/ELOVL7/PRKAB1/GGT1/NAGS/PTGS1/CBR1/PFKFB3/LPL/PRKAG2/HSD3B7/MGLL/ASL/GGT5/ELOVL1/ACADVL/PPARGC1A/ELOVL2/STAT3/ESRRB/PDGFB/SHMT1/HSD17B8/SHMT2/RBP1/SCD/TGFB1/PPARA/DPYD/PTGS2/GOT1/OSBPL3/AMACR/FADS2/MLYCD/NUP107/BPGM/NR1H2/SIRT1/PRKAA2/OSBP/NR1D1/RAE1/NUP58/BRCA1/PECR/OSBPL6/NUP160/GLS/CDO1/PTGES/CD74/GLUD1/NUP205/SEPHS2/NAT8L/ACSM3/SLC45A3/NUP155/ATIC/GALK1/PS…	141
BP	GO:0016053	organic acid biosynthetic process	141/4196	443/19623	1.48e-07	2.6e-05	2.04e-05	HYAL1/CEACAM1/EDN1/HOGA1/OGDHL/ACSS1/ELOVL7/PRKAB1/GGT1/NAGS/PTGS1/CBR1/PFKFB3/LPL/PRKAG2/HSD3B7/MGLL/ASL/GGT5/ELOVL1/ACADVL/PPARGC1A/ELOVL2/STAT3/ESRRB/PDGFB/SHMT1/HSD17B8/SHMT2/RBP1/SCD/TGFB1/PPARA/DPYD/PTGS2/GOT1/OSBPL3/AMACR/FADS2/MLYCD/NUP107/BPGM/NR1H2/SIRT1/PRKAA2/OSBP/NR1D1/RAE1/NUP58/BRCA1/PECR/OSBPL6/NUP160/GLS/CDO1/PTGES/CD74/GLUD1/NUP205/SEPHS2/NAT8L/ACSM3/SLC45A3/NUP155/ATIC/GALK1/PS…	141
BP	GO:0051054	positive regulation of DNA metabolic process	87/4196	243/19623	1.51e-07	2.6e-05	2.04e-05	TNFSF13/PTK2B/EYA1/CD40/HNRNPA1/PARP3/KITLG/PPARGC1A/MSH6/RAD51/AURKB/PDGFB/NEK2/HMGB1/CDK1/E2F7/GNL3/PARP1/TGFB1/MSH2/CLCF1/SLF1/BABAM2/PRKCQ/DSCC1/MAPK3/CDK2/SIRT1/KLF4/TNFAIP1/CDC7/DNMT1/CDT1/DNA2/ENDOG/BRCA1/ATAD5/NSD2/CCT2/RFC4/ANXA3/CCT4/RFC3/H2AFX/RFC2/FOXM1/E2F8/TIMELESS/DBF4/STAT6/CTNNB1/RIF1/TNKS/HSP90AB1/DHX9/TCP1/DBF4B/SLF2/CCT5/PCNA/EYA4/CCT6A/UBE2V2/RFC5/BMP6/CCT3/FGFR1/WRN/NVL/SETD…	87
BP	GO:0051056	regulation of small GTPase mediated signal transduction	122/4196	372/19623	1.71e-07	2.87e-05	2.25e-05	AGFG2/RAP1GAP/EPS8L2/RASGRP1/ADAP1/FGD3/STMN1/ROBO1/STARD8/RASAL1/F2RL1/ARHGAP11A/ARHGEF16/KITLG/PSD4/ARRB1/CHN1/GPR4/ARHGAP11B/ARHGAP29/MYO9A/KIF14/ARHGEF10L/RACGAP1/RHOD/TNK1/SQSTM1/ARHGAP18/BCL6/FGD4/ARHGAP24/DNM2/ADGRG1/ARHGEF15/P2RY8/CSF1/ARHGEF37/ARHGAP6/TNFAIP1/RAP1GAP2/CAVIN4/DEPDC1B/ADCYAP1R1/RASGRF2/ARHGEF39/ECT2/TRIP10/SIPA1/FOXM1/RHOBTB1/EPS8L1/ARHGAP45/VAV3/CDON/SPATA13/ARFGEF3/ARAP2…	122
BP	GO:0035690	cellular response to drug	123/4196	376/19623	1.78e-07	2.91e-05	2.28e-05	KCNQ1/EDN1/PDE2A/TRPM4/ZC3H12A/LRRK2/KLF2/TLR3/ICAM1/PRKN/IL18BP/HDAC2/AQP1/HNRNPA1/MAPK13/KLF9/PPARGC1A/DCPS/MYB/RAD51/PDGFB/GDF1/CDK1/CCNA2/TGFB1/PDE4A/DNM2/BLM/PTGS2/RECQL5/NR4A3/DNMT3A/CFLAR/MAPK3/NFE2L2/CDK2/EZH2/SIRT1/KLF4/PRKAA2/CDK5R1/AIFM1/MAP1LC3A/GAS6/AHR/ENDOG/BRCA1/ECT2/HMGA2/APEX1/CBX3/RAP2A/FYN/JUP/TIMELESS/CDH1/CHEK2/CHRNA7/ERRFI1/STAT6/LYPD1/PPP1R14A/CTNNB1/NQO1/CASTOR1/HSP90AB1/…	123
BP	GO:0072006	nephron development	59/4196	147/19623	1.87e-07	2.99e-05	2.35e-05	TEK/WNK4/ACAT1/GATA3/COL4A4/HNF1B/SIX1/EYA1/SIX2/GPR4/PDGFB/TGFB1/FGF1/FGF8/CFLAR/PKD2/KLF15/LIF/NPNT/ADAMTS16/FOXJ1/SIX4/IRX3/PBX1/CTNNB1/VANGL2/EGR1/ITGA3/CITED1/GLI3/KIF26B/LAMA5/CD34/BMP7/LGR4/PECAM1/STAT1/POU3F3/PODXL/IQGAP1/PROM1/OSR1/CD24/WT1/LAMB2/MAGI2/GDNF/SALL1/FOXC2/HOXA11/DCHS2/VEGFA/PGF/HOXB7/DCHS1/WNT11/GREM1/MYO1E/FOXD1	59
BP	GO:0009108	coenzyme biosynthetic process	92/4196	264/19623	2.77e-07	4.32e-05	3.39e-05	ACSL1/ACSL5/OGDHL/SPR/ACSS1/ELOVL7/ACAT1/PDXK/PFKFB3/PRKAG2/NMRK1/MPC1/NFS1/ELOVL1/PPARGC1A/ELOVL2/STAT3/ESRRB/HSD17B8/COQ10B/SCD/MOCS2/PDHA1/PPARA/PTGS2/MLYCD/COQ9/NUP107/BPGM/PNP/PRKAA2/NAPRT/SLC25A1/PARP10/RAE1/NUP58/NUP160/ACSL4/PNPO/IDH2/NUP205/SLC25A16/MOCS1/NUP155/ATIC/GALK1/MPC2/NDC1/PCBD2/ELOVL5/NUP153/NNMT/PDK4/OGDH/PDP1/DHFR/DHFR2/NADSYN1/NMNAT3/NUP133/HIF1A/ACACB/SCD5/PDP2/NAMPT/PDSS1…	92
BP	GO:0034329	cell junction assembly	88/4196	250/19623	3.03e-07	4.6e-05	3.61e-05	TEK/PTK2B/ITGB4/ITGA2/PRKCH/PARD6A/SDC4/MPP7/TRPV4/LIMS2/MYO9A/MARVELD3/CDH2/RHOD/GJC1/VMP1/PARD6B/CD151/MYO1C/VASP/CD9/ARHGAP6/CDH7/S100A10/ECT2/CDH24/GJA5/DMTN/PKP4/JUP/CDH1/F11R/CTTN/PARD6G/CTNNB1/TNS1/HEG1/RCC2/CLDN1/RHOC/WDR1/ZNF703/THBS1/RAMP2/FSCN1/PATJ/THY1/GJA4/ACVRL1/ITGB1BP1/LAMA5/OCLN/TRIP6/PLEC/KDR/CDH13/IQGAP1/GJA1/CDH5/CDH10/CDH11/ACTN4/SLC9A1/PIP5K1A/CDH12/UGT8/PARD3/FBF1/SH3BP1/C…	88
BP	GO:0072330	monocarboxylic acid biosynthetic process	106/4196	316/19623	3.16e-07	4.69e-05	3.68e-05	CEACAM1/EDN1/HOGA1/OGDHL/ACSS1/ELOVL7/PRKAB1/PTGS1/CBR1/PFKFB3/LPL/PRKAG2/HSD3B7/MGLL/ELOVL1/ACADVL/PPARGC1A/ELOVL2/STAT3/ESRRB/HSD17B8/RBP1/SCD/PPARA/PTGS2/OSBPL3/AMACR/FADS2/MLYCD/NUP107/BPGM/NR1H2/SIRT1/PRKAA2/OSBP/NR1D1/RAE1/NUP58/BRCA1/PECR/OSBPL6/NUP160/PTGES/CD74/NUP205/ACSM3/SLC45A3/NUP155/GALK1/NDC1/ELOVL5/NUP153/PDK4/OGDH/MID1IP1/SCP2/SLC27A2/FAM213B/NUP133/CYP39A1/HIF1A/ACACB/ALOX5AP/S…	106
BP	GO:0071260	cellular response to mechanical stimulus	37/4196	79/19623	4.12e-07	5.92e-05	4.65e-05	PDE2A/PIEZO1/TLR5/IRF1/ITGA2/TLR3/ATP1A1/AQP1/CD40/MMP7/TGFB1/PTGS2/ENG/MAPK3/GADD45A/HABP4/TMEM150C/CHEK1/CASP8AP2/CASP8/CASP1/BMP6/NFKB1/LTBR/CRADD/PIEZO2/GJA1/SLC9A1/CYBA/CASP2/TNFRSF10B/RIPOR2/WNT11/EGFR/CNN2/SLC2A1/SCX	37
BP	GO:0007409	axonogenesis	149/4196	481/19623	4.18e-07	5.92e-05	4.65e-05	RAP1GAP/NTN4/SEMA4A/STMN1/ROBO1/ENAH/GATA3/B3GNT2/NR4A2/NCAM1/KIF13B/TNFRSF12A/L1CAM/CHN1/S100A6/CYFIP2/CDH2/SSH3/ADNP/FZD3/DNM2/CRABP2/ROBO3/SEMA3G/FGF8/FAM129B/NR4A3/PRKCQ/PARD6B/MAPK3/VASP/SPTBN2/EZR/DSCAML1/CDK5R1/COBL/CNP/TOP2B/EGR2/RTN4/APP/BMPR1B/PIK3CB/SPP1/FBXO45/LRRN1/SLIT1/FYN/SEMA3B/PRELP/CTTN/DOK5/UNC5B/VANGL2/DRAXIN/ROBO2/GFRA1/PICALM/EVL/TIAM1/EFNA1/ETV1/MAP1B/VAX2/ERBB2/TUBB2B/ATP…	149
BP	GO:0007266	Rho protein signal transduction	80/4196	224/19623	5.25e-07	7.14e-05	5.61e-05	EPS8L2/FGD3/STMN1/ROBO1/F2RL1/CNKSR1/ARHGEF16/ARRB1/GPR4/ARHGAP29/ARHGEF10L/RHOD/BCL6/FGD4/ADGRG1/ARHGEF15/P2RY8/ARHGEF37/TAX1BP3/ARHGAP6/TNFAIP1/CAVIN4/RASGRF2/ARHGEF39/ECT2/RHOBTB1/EPS8L1/VAV3/SPATA13/VANGL2/ARAP2/FGD5/F2RL3/TRIO/SYNJ2BP/TIAM1/ITSN2/RHOB/DNMBP/ITGA3/RHOC/ADRA2A/CDC42EP2/PDPN/FGD1/RTN4R/ARHGEF28/RTKN/RIPOR1/PAK1/ARHGEF25/PLEKHG2/CDC42EP1/CDH13/ARHGAP4/PLEKHG3/RAC2/PLEKHG1/SBK2/A…	80
BP	GO:0022616	DNA strand elongation	18/4196	27/19623	5.26e-07	7.14e-05	5.61e-05	PARP3/PARP1/GINS1/DNA2/RFC4/DCLRE1B/RFC3/NUCKS1/GINS2/GINS4/RNASEH2A/POLE/PCNA/GINS3/POLA1/FEN1/LIG1/LIG3	18
BP	GO:0072009	nephron epithelium development	49/4196	118/19623	6.02e-07	7.75e-05	6.08e-05	WNK4/ACAT1/GATA3/HNF1B/SIX1/EYA1/SIX2/TGFB1/FGF1/FGF8/PKD2/KLF15/LIF/NPNT/ADAMTS16/FOXJ1/SIX4/IRX3/PBX1/CTNNB1/CITED1/GLI3/KIF26B/LAMA5/CD34/LGR4/PECAM1/STAT1/POU3F3/PODXL/IQGAP1/PROM1/OSR1/CD24/WT1/LAMB2/MAGI2/GDNF/SALL1/FOXC2/HOXA11/VEGFA/PGF/HOXB7/DCHS1/WNT11/GREM1/MYO1E/FOXD1	49
BP	GO:0043062	extracellular structure organization	139/4196	445/19623	6.03e-07	7.75e-05	6.08e-05	HYAL1/MELTF/ELF3/ITGB4/TNFRSF11B/ITGA2/COL2A1/ICAM1/COL4A4/LPL/SDC4/VWA1/MMP7/HPN/LAMA4/ADAMTS20/PDGFB/PXDN/BCL3/MYH11/ICAM2/B4GALT1/TGFB1/ANTXR1/ENG/MMP16/CFLAR/FURIN/NFKB2/NR1H2/GAS6/TNXB/ITGB8/NPNT/ADAMTSL2/APP/SPP1/MMP19/CAPN1/DPP4/CDH1/F11R/CTSL/SDC1/MFAP2/SPINT1/COL13A1/ABCG1/COL18A1/FAM234A/SERPINE1/LOXL3/ITGAV/PLAGL2/KIF9/AGRN/CYR61/JAM3/ITGA3/CRISPLD2/LOXL4/MPZL3/ABCA7/A2M/HAS2/PDPN/THBS…	139
BP	GO:0009612	response to mechanical stimulus	77/4196	214/19623	6.07e-07	7.75e-05	6.08e-05	EDN1/PDE2A/PTK2B/PIEZO1/TLR5/IRF1/ITGA2/USP53/TLR3/PPL/ATP1A1/AQP1/CD40/PPARG/TRPV4/JUNB/MMP7/HPN/ABHD12/FOSB/TGFB1/PTGS2/CCNB1/ENG/NFKBIA/MAPK3/GADD45A/TGFBR2/HABP4/BTG2/PKD2/ENDOG/TMEM150C/FOS/FYN/CHEK1/JUP/CHRNA9/CNTNAP2/CASP8AP2/CASP8/DENND5B/CASP1/KCNC1/ETV1/ATP8A2/BMP6/THBS1/NRXN2/KCNK2/SHANK3/NFKB1/TXNIP/LTBR/STAT1/CRADD/PIEZO2/GJA1/NRXN1/SLC9A1/CYBA/CASP2/TNFRSF10B/PDZD7/KCNA5/JUND/RIPOR2…	77
BP	GO:0010975	regulation of neuron projection development	145/4196	470/19623	7.72e-07	9.65e-05	7.58e-05	CPEB3/INPP5J/PTK2B/CX3CL1/LRRK2/SEMA4A/ROBO1/RASAL1/CCDC88A/GATA3/PRKN/HDAC2/LZTS3/KIF13B/TRPV4/TNFRSF12A/CDC20/L1CAM/CHN1/CDH2/SSH3/ARC/SHANK2/ADNP/CIB1/MAP4K4/DNM2/CRABP2/SEMA3G/CFLAR/NFE2L2/EZH2/PPP2R5B/KLF4/CDK5R1/RAP1GAP2/LYN/CTSZ/TBX6/COBL/SCARF1/KDM1A/MUL1/RTN4/SPP1/MAPK6/FXR1/RAB29/RAP2A/FYN/SEMA3B/PTK7/RGMA/FES/CTTN/ENC1/ASAP1/DRAXIN/ROBO2/SYT17/CAPRIN1/TIAM1/EFNA1/ITSN2/MAP1B/ITGA3/TUBB…	145
BP	GO:0031055	chromatin remodeling at centromere	25/4196	46/19623	9.76e-07	0.000119152	9.36e-05	HJURP/RBBP4/CENPA/CENPI/KNL1/OIP5/CENPH/NPM1/CENPU/CENPP/HELLS/MIS18BP1/CENPM/CENPK/CENPL/CENPO/NASP/CENPV/CENPQ/MIS18A/CENPW/SMARCA5/CENPN/HIST1H4C/ITGB3BP	25
BP	GO:0051783	regulation of nuclear division	71/4196	195/19623	9.9e-07	0.000119152	9.36e-05	EDN1/NUSAP1/IGF2/KIF11/CDC25C/CDC6/BUB1B/BUB1/NDC80/TTK/CENPF/CDC20/CENPE/TRIP13/PDGFB/NEK2/DLGAP5/MTBP/PTTG1/SMC3/TACC3/CDCA5/TGFB1/MSH2/SLF1/ANLN/CCNB1/KIF20B/FBXO5/UBE2C/FGF8/RAD21/FBXO43/RANBP1/MAD2L1/PKMYT1/PLK1/AURKA/MKI67/TOM1L2/KNTC1/CDT1/LIF/BORA/DUSP1/CHMP2A/CAV2/TOM1L1/ESPL1/BTC/PHIP/CHEK1/GEN1/H2AFY/TNKS/SLF2/SMC1A/CEP97/BMP7/CCSAP/RGCC/DYNC1LI1/MAD2L2/RCC1/CDK5RAP2/ANAPC1/CEP85/PDXP/…	71
BP	GO:0001892	embryonic placenta development	41/4196	94/19623	1.06e-06	0.000124257	9.76e-05	GATA2/TFEB/IGF2/PHLDA2/EPAS1/JUNB/SP3/PDGFB/PLK4/VASH2/E2F7/SOCS3/ST14/RBPJ/PLCD1/PKD2/LIF/HS6ST1/E2F8/CASP8/SPINT1/CEBPB/NR2F2/CYR61/CITED1/KRT19/HIF1A/BMP7/KRT8/HEY1/NRK/SPINT2/ADM/FZD5/SNAI1/PCDH12/LEF1/PLCD3/EGFR/VASH1/MDFI	41
BP	GO:0090329	regulation of DNA-dependent DNA replication	26/4196	49/19623	1.1e-06	0.000124257	9.76e-05	DACH1/E2F7/SMC3/BCL6/BLM/DSCC1/CDK2/TICRR/CDC7/ZRANB3/CDT1/RFC4/RFC3/BRCA2/RFC2/E2F8/DONSON/TIMELESS/CHEK2/DBF4B/SMC1A/RFC5/BMP6/FGFR1/CHTF18/LIG3	26
BP	GO:0022604	regulation of cell morphogenesis	152/4196	500/19623	1.1e-06	0.000124257	9.76e-05	MELTF/PTK2B/FGD3/LRRK2/SEMA4A/ROBO1/RASAL1/ICAM1/PRKN/LZTS3/KIF13B/TNFRSF12A/L1CAM/HPN/CHN1/CARMIL1/PALMD/CDH2/PRPF40A/RHOD/SSH3/ARC/ANXA7/ADNP/ARHGAP18/FGD4/CIB1/DNM2/CRABP2/SEMA3G/PLEKHO1/ATP10A/ZMYM4/EZR/WASF3/CDK5R1/S100A10/CDC7/CCL2/MUL1/RTN4/SPP1/FXR1/PHIP/RAP2A/DMTN/FYN/CAMSAP1/RHOBTB1/SEMA3B/FES/CTTN/ZMYM2/C21orf2/DRAXIN/ENPP2/ROBO2/FGD5/SYT17/CAPRIN1/TIAM1/EFNA1/ITSN2/RHOB/STRIP2/CSNK1E/…	152
BP	GO:0030198	extracellular matrix organization	122/4196	384/19623	1.11e-06	0.000124257	9.76e-05	MELTF/ELF3/ITGB4/TNFRSF11B/ITGA2/COL2A1/ICAM1/COL4A4/VWA1/MMP7/HPN/LAMA4/ADAMTS20/PDGFB/PXDN/BCL3/MYH11/ICAM2/B4GALT1/TGFB1/ANTXR1/ENG/MMP16/CFLAR/FURIN/NFKB2/GAS6/TNXB/ITGB8/NPNT/ADAMTSL2/APP/SPP1/MMP19/CAPN1/DPP4/CDH1/F11R/CTSL/MFAP2/SPINT1/COL13A1/COL18A1/FAM234A/SERPINE1/LOXL3/ITGAV/KIF9/AGRN/CYR61/JAM3/ITGA3/CRISPLD2/LOXL4/MPZL3/A2M/HAS2/PDPN/THBS1/RAMP2/FSCN1/THSD4/COL7A1/COL9A1/ADAM15/ABI3…	122
BP	GO:0051784	negative regulation of nuclear division	29/4196	58/19623	1.35e-06	0.000148889	0.000116924	BUB1B/BUB1/NDC80/TTK/CENPF/TRIP13/MTBP/PTTG1/MSH2/CCNB1/FBXO5/RAD21/FBXO43/MAD2L1/PLK1/TOM1L2/CDT1/LIF/DUSP1/TOM1L1/CHEK1/GEN1/TNKS/BMP7/RGCC/DYNC1LI1/MAD2L2/CDK5RAP2/TPR	29
BP	GO:0033045	regulation of sister chromatid segregation	35/4196	76/19623	1.38e-06	0.00014908	0.000117074	CDC6/BUB1B/BUB1/NDC80/TTK/CENPF/CENPE/TRIP13/DLGAP5/PTTG1/TACC3/CDCA5/SLF1/CCNB1/UBE2C/RAD21/MAD2L1/PLK1/CDT1/DUSP1/ESPL1/GEN1/CTNNB1/H2AFY/TNKS/SLF2/RMI2/FEN1/DDX11/DYNC1LI1/MAD2L2/CDK5RAP2/ANAPC1/TPR/NEK6	35
BP	GO:0006732	coenzyme metabolic process	128/4196	409/19623	1.48e-06	0.000157718	0.000123857	ACSL1/ACSL5/OGDHL/ACOT11/RBKS/MVK/SPR/ACSS1/ELOVL7/ACAT1/PDXK/PFKFB3/PRKAG2/NMRK1/MPC1/NFS1/NUDT7/ELOVL1/HMGCL/TYMS/PPARGC1A/ELOVL2/PCCA/STAT3/ESRRB/SHMT1/HSD17B8/COQ10B/SHMT2/SCD/MOCS2/PDHA1/CYB5A/PPARA/PTGS2/BTD/MLYCD/COQ9/NUP107/BPGM/PNP/PRKAA2/NAPRT/SLC25A1/PARP10/RAE1/NUP58/NUP160/ACSL4/ACOT4/PNPO/IDH2/MCCC2/NUP205/SLC25A16/ACSM3/MOCS1/MTHFD2/NUP155/ATIC/GALK1/MPC2/NDC1/PCBD2/ELOVL5/NUP153/C…	128
BP	GO:0034330	cell junction organization	99/4196	300/19623	1.76e-06	0.000183602	0.000144184	KIFC3/TEK/PTK2B/ITGB4/ITGA2/F2RL1/PRKCH/PARD6A/SDC4/MPP7/TRPV4/LIMS2/MYO9A/MARVELD3/CDH2/RHOD/GJC1/TGFB1/VMP1/GRHL1/PARD6B/CD151/MYO1C/VASP/CD9/ARHGAP6/CDH7/S100A10/ECT2/CDH24/GJA5/DMTN/PKP4/JUP/CDH1/F11R/CTTN/PARD6G/CTNNB1/TNS1/HEG1/RCC2/CLDN1/PLEKHA7/RHOC/WDR1/ZNF703/THBS1/RAMP2/FSCN1/PATJ/THY1/CADM1/GJA4/ACVRL1/ITGB1BP1/LAMA5/OCLN/PERP/TRIP6/PLEC/KDR/CDH13/IQGAP1/NECTIN3/GJA1/CDH5/CDH10/CDH11/…	99
BP	GO:0043044	ATP-dependent chromatin remodeling	37/4196	83/19623	1.85e-06	0.000190701	0.000149759	HDAC2/HJURP/RBBP4/CENPA/CENPI/KNL1/OIP5/CENPH/NPM1/SMARCC1/CENPU/CENPP/SMARCE1/PBRM1/MIS18BP1/CENPM/ANP32B/CENPK/CENPL/CENPO/NASP/ACTL6A/SMARCAD1/CENPQ/MIS18A/CENPW/SMARCA5/SMARCB1/PSME4/VPS72/CECR2/ARID1A/CENPN/ANP32E/HIST1H4C/ITGB3BP/GATAD2B	37
BP	GO:0007052	mitotic spindle organization	52/4196	133/19623	2.48e-06	0.000250614	0.000196809	BIRC3/STMN1/TPX2/KIF11/NDC80/PARP3/TTK/BIRC5/CDC20/SPAST/CENPE/AURKB/MYBL2/NEK2/PRC1/RACGAP1/KIFC1/PSRC1/SPC25/KIF4A/SMC3/TACC3/NUF2/CCNB1/PLK1/AURKA/KIF23/RAE1/KPNB1/BORA/CHMP2A/POC1A/STIL/SBDS/WDR62/KIF3B/CHEK2/RAN/KIF2A/TNKS/SMC1A/SPICE1/TUBGCP3/CEP97/CCSAP/FSD1/RCC1/GPSM2/TBCE/GNAI1/MZT1/TPR	52
BP	GO:0060993	kidney morphogenesis	42/4196	100/19623	2.63e-06	0.000261851	0.000205634	WNK4/LRRK2/GATA3/HNF1B/GCNT4/SIX1/EYA1/SIX2/TGFB1/FGF1/FGF8/PKD2/LIF/NPNT/ADAMTS16/FOXJ1/PRKX/SIX4/IRX3/PBX1/CTNNB1/VANGL2/CITED1/GLI3/KIF26B/LAMA5/BMP7/LGR4/STAT1/SOX4/OSR1/WT1/GDNF/SALL1/HOXA11/VEGFA/PGF/HOXB7/DCHS1/WNT11/GREM1/FOXD1	42
BP	GO:1902850	microtubule cytoskeleton organization involved in mitosis	58/4196	154/19623	2.76e-06	0.00026737	0.000209967	NUSAP1/BIRC3/STMN1/TPX2/KIF11/CENPA/NDC80/PARP3/TTK/BIRC5/CDC20/SPAST/CENPE/AURKB/MYBL2/NEK2/PRC1/RACGAP1/KIFC1/PSRC1/SPC25/KIF4A/SMC3/TACC3/SPDL1/NUF2/CCNB1/PLK1/AURKA/KIF23/RAE1/KPNB1/BORA/CHMP2A/POC1A/STIL/SBDS/ESPL1/WDR62/KIF3B/SAPCD2/CHEK2/RAN/KIF2A/TNKS/SMC1A/SPICE1/TUBGCP3/CEP97/CCSAP/FSD1/RCC1/CDK5RAP2/GPSM2/TBCE/GNAI1/MZT1/TPR	58
BP	GO:0045839	negative regulation of mitotic nuclear division	25/4196	48/19623	2.77e-06	0.00026737	0.000209967	BUB1B/BUB1/NDC80/TTK/CENPF/TRIP13/MTBP/PTTG1/CCNB1/RAD21/MAD2L1/PLK1/TOM1L2/CDT1/DUSP1/TOM1L1/CHEK1/GEN1/TNKS/BMP7/RGCC/DYNC1LI1/MAD2L2/CDK5RAP2/TPR	25
BP	GO:0006631	fatty acid metabolic process	125/4196	402/19623	2.82e-06	0.000268113	0.000210551	CEACAM1/ACSL1/EDN1/ACSL5/ACOT11/CRYL1/ACADS/ACSS1/ELOVL7/PRKAB1/GGT1/ACAT1/ACAA1/PTGS1/CBR1/ETFDH/LPL/PRKAG2/AKR1C1/MGLL/PPARG/GGT5/FABP3/NUDT7/ELOVL1/ACADVL/PPARGC1A/ELOVL2/PCCA/HSD17B8/HADHB/ACADSB/PTGR2/SCD/CYP4V2/PDHA1/CPT1A/PPARA/AUH/PTGS2/AMACR/NR4A3/EPHX2/FADS2/MLYCD/MAPK3/STAT5A/NR1H2/SIRT1/LPIN3/PRKAA2/PLA2G15/FAAH/BRCA1/PECR/ACSL4/DECR1/ETFBKMT/PTGES/ACOT4/CD74/ACSM3/SLC45A3/PTGR1/ACAA2…	125
BP	GO:0001667	ameboidal-type cell migration	135/4196	441/19623	2.89e-06	0.000271253	0.000213017	HYAL1/PBLD/CEACAM1/EDN1/TEK/CTSH/PTK2B/RAB25/ZC3H12A/NOS3/ITGA2/SEMA4A/ROBO1/GATA3/MMRN2/SDC4/NR4A1/CD40/PPARG/PRR5L/HBEGF/SOX17/KITLG/PDGFB/MARVELD3/HMGB1/TNFSF12/TGFB1/CIB1/ACVR1B/PTGS2/ANLN/FGF1/SEMA3G/FGF8/NFE2L2/SPRED1/STAT5A/SIRT1/KLF4/TBXA2R/TGFBR2/HYAL2/GLIPR2/RTN4/ANXA3/SOX18/GIPC1/PXN/PRKX/DMTN/PRCP/EPB41L4B/SEMA3B/SP100/DPP4/JUP/MAP2K3/EDNRB/TNS1/ENPP2/AGO2/EVL/SYNJ2BP/EFNA1/RHOB/NR2F2…	135
BP	GO:0060485	mesenchyme development	89/4196	266/19623	3.04e-06	0.000280918	0.000220607	PBLD/EDN1/SOX11/SEMA4A/S100A4/HDAC2/SIX1/SIX2/KITLG/HPN/FAM83D/MEOX1/TGFB1/ENG/SEMA3G/FGF8/ERG/TBX2/MAPK3/EZH2/VASN/TGFBR2/RBPJ/GLIPR2/PKD2/BMPR1A/DLL3/FGF9/RTN4/HMGA2/SIX4/SEMA3B/PTK7/EDNRB/CTNNB1/TIAM1/EFNA1/NOLC1/LOXL3/ERBB3/NUP133/HAS2/PDPN/HIF1A/ZNF703/FGFR1/STRAP/LRP6/SEMA4D/GBX2/ADAM15/ACVRL1/EXOC4/LAMA5/BMP7/TEAD2/PHLDB1/RGCC/SDCBP/STAT1/OLFM1/MAD2L2/DAB2/SEMA3C/OSR1/WT1/HEY1/GDNF/TGFBR3/…	89
BP	GO:0061005	cell differentiation involved in kidney development	29/4196	60/19623	3.27e-06	0.000297803	0.000233867	GATA3/SIX2/GPR4/PDGFB/GLIS2/KLF15/LIF/FOXJ1/PRKX/CTNNB1/CITED1/GLI3/CD34/LGR4/STAT1/POU3F3/PODXL/IQGAP1/PROM1/OSR1/CD24/WT1/LAMB2/MAGI2/GDNF/SALL1/FOXC2/GREM1/MYO1E	29
BP	GO:0045766	positive regulation of angiogenesis	71/4196	201/19623	3.51e-06	0.000312858	0.00024569	HYAL1/RAPGEF3/TEK/GATA2/CTSH/PTK2B/ZC3H12A/NOS3/CX3CL1/TLR3/AQP1/CD40/STAT3/VASH2/TNFSF12/CIB1/PTGS2/ENG/FGF1/NFE2L2/DDAH1/SIRT1/KLF4/TBXA2R/TGFBR2/RRAS/ITGB8/BRCA1/EPHA1/F3/ANXA3/HMGA2/PPP1R16B/JUP/CHRNA7/AGO2/SERPINE1/RHOB/SASH1/HIF1A/THBS1/RAMP2/PLCG1/FLT1/C3/ACVRL1/HK2/CD34/SRPX2/KDR/ANXA1/CDH5/BTG1/RHOJ/PRKD1/AGTR1/CYP1B1/VEGFB/ADM/HSPB1/APLNR/FOXC2/JAK1/VEGFA/PGF/ANGPTL4/HGF/GATA4/GREM1/AKT…	71
BP	GO:0048568	embryonic organ development	142/4196	470/19623	3.56e-06	0.000312858	0.00024569	HYAL1/EDN1/GATA2/ATP6V1B1/TFEB/PPP1R13L/SOX11/COL2A1/GATA3/IGF2/PHLDA2/HNF1B/SIX1/SLC44A4/EYA1/EPAS1/SIX2/SOX17/JUNB/KITLG/HPN/SP3/PDGFB/PLK4/VASH2/E2F7/FZD3/SOCS3/TGFB1/SOBP/ENG/FGF8/MMP16/NR4A3/TBX2/MAPK3/NAGLU/ST14/ARID2/MIB1/RNF207/PKDCC/DSCAML1/TGFBR2/RBPJ/PLCD1/FZD2/MYCN/PKD2/BMPR1A/COBL/RAD23B/LIF/FGF9/CHD7/STIL/GJA5/SOX18/HS6ST1/SIX4/IRX5/E2F8/KDM2B/PTK7/CHRNA9/ROR2/PBX1/MFAP2/CASP8/DNAAF…	142
BP	GO:0032201	telomere maintenance via semi-conservative replication	17/4196	27/19623	3.58e-06	0.000312858	0.00024569	PRIM2/DNA2/RFC4/RFC3/RFC2/POLD4/POLE3/POLE/PCNA/PRIM1/POLE2/RFC5/POLA1/FEN1/POLD3/POLD1/POLA2	17
BP	GO:1904018	positive regulation of vasculature development	77/4196	223/19623	3.71e-06	0.000320082	0.000251362	HYAL1/CEACAM1/RAPGEF3/TEK/GATA2/CTSH/PTK2B/ZC3H12A/NOS3/CX3CL1/TLR3/GPER1/AQP1/CD40/STAT3/PDGFB/VASH2/TNFSF12/CIB1/PTGS2/ENG/FGF1/CFLAR/NFE2L2/DDAH1/SIRT1/KLF4/TBXA2R/TGFBR2/RRAS/ITGB8/BRCA1/EPHA1/F3/ANXA3/HMGA2/PPP1R16B/JUP/CHRNA7/AGO2/SERPINE1/EGR1/RHOB/SASH1/HIF1A/THBS1/RAMP2/PLCG1/FLT1/C3/ACVRL1/HK2/CD34/SRPX2/KDR/ANXA1/CDH5/BTG1/RHOJ/PRKD1/AGTR1/CYP1B1/VEGFB/ADM/TMEM100/HSPB1/APLNR/FOXC2/JAK…	77
BP	GO:0071103	DNA conformation change	103/4196	320/19623	3.89e-06	0.000330998	0.000259935	TOP2A/NUSAP1/HIST1H1B/NAP1L1/HJURP/GPER1/RBBP4/CENPA/NCAPG/MCM6/CENPI/BRIP1/NCAPH/HIST1H2BM/RAD51/MCM7/PIF1/MCM2/HMGB3/H2AFY2/KNL1/NCAPD2/HMGB1/CDK1/OIP5/HIST1H1C/MCM4/PARP1/CDCA5/CENPH/HMGB2/CDC45/HIST1H2BF/BLM/CCNB1/RECQL5/NPM1/SRPK1/CENPU/CENPP/ASF1B/HELLS/GINS1/TOP1/SMC2/AIFM1/MIS18BP1/CENPM/SET/ZRANB3/HIST3H2BB/DNA2/PARP10/RAD23B/TOP2B/ANP32B/SMC4/RAD54L/CENPK/CENPL/HMGA2/H2AFX/NAA60/NCAPG2/…	103
BP	GO:0006310	DNA recombination	93/4196	283/19623	4.33e-06	0.000363764	0.000285666	TNFSF13/TOP2A/C11orf80/EME1/NONO/CD40/BRIP1/MSH6/KPNA2/EXO1/RAD51/TRIP13/PIF1/HMGB3/MND1/HMGB1/POLQ/BCL6/PARP1/HMGB2/TGFB1/CDC45/MSH2/CLCF1/XRCC2/BLM/RECQL5/RAD21/BARD1/TCF3/RAD51AP1/PRKDC/RBPJ/CDC7/MMS22L/ZRANB3/DNA2/PARPBP/ENDOG/BRCA1/TOP2B/ALYREF/KDM1A/RAD54L/ATAD5/NSD2/IL27RA/BRCA2/APEX1/H2AFX/PPP4R2/CHEK1/NUCKS1/GINS2/AUNIP/GINS4/RNF138/GEN1/HSPD1/STAT6/RIF1/RECQL4/SWSAP1/TEX15/ACTL6A/SMARCA…	93
BP	GO:0035850	epithelial cell differentiation involved in kidney development	25/4196	49/19623	4.5e-06	0.000373074	0.000292978	GATA3/SIX2/GPR4/PDGFB/KLF15/LIF/FOXJ1/PRKX/CTNNB1/CITED1/CD34/STAT1/PODXL/IQGAP1/PROM1/OSR1/CD24/WT1/LAMB2/MAGI2/GDNF/SALL1/FOXC2/GREM1/MYO1E	25
BP	GO:0045216	cell-cell junction organization	87/4196	261/19623	4.62e-06	0.000377887	0.000296757	KIFC3/TEK/PTK2B/ITGA2/F2RL1/PRKCH/PARD6A/SDC4/MPP7/TRPV4/LIMS2/MARVELD3/CDH2/RHOD/GJC1/TGFB1/GRHL1/PARD6B/MYO1C/CD9/ARHGAP6/CDH7/S100A10/ECT2/CDH24/GJA5/DMTN/PKP4/JUP/CDH1/F11R/CTTN/PARD6G/CTNNB1/HEG1/RCC2/CLDN1/PLEKHA7/RHOC/WDR1/ZNF703/THBS1/RAMP2/FSCN1/PATJ/THY1/CADM1/GJA4/ACVRL1/ITGB1BP1/LAMA5/OCLN/PERP/TRIP6/KDR/CDH13/IQGAP1/NECTIN3/GJA1/CDH5/CDH10/CDH11/ACTN4/SLC9A1/PIP5K1A/CDH12/UGT8/PARD3/…	87
BP	GO:0034508	centromere complex assembly	27/4196	55/19623	4.88e-06	0.000393709	0.000309182	HJURP/RBBP4/CENPA/CENPI/CENPF/CENPE/KNL1/OIP5/CENPH/NPM1/CENPU/CENPP/HELLS/MIS18BP1/CENPM/CENPK/CENPL/CENPO/NASP/CENPV/CENPQ/MIS18A/CENPW/SMARCA5/CENPN/HIST1H4C/ITGB3BP	27
BP	GO:0007568	aging	102/4196	318/19623	5.13e-06	0.000409083	0.000321256	KL/EDN1/TFCP2L1/SOD2/LRRK2/ICAM1/ARG2/TYMS/PPARGC1A/MSH6/MMP7/CRYAB/STAT3/AURKB/CDK1/BCL6/SLC32A1/TGFB1/MSH2/TSPO/PTGS2/ENG/NPM1/ND4/DNMT3A/TBX2/NFE2L2/NFKB2/SIRT1/ATP6/PTH1R/PRKDC/TGFBR2/HYAL2/BMPR1A/ENDOG/CNP/SERPING1/COX1/RAD54L/ATP2B1/FOS/APP/CAT/BRCA2/HMGA2/APEX1/H2AFX/FOXM1/CHEK1/SIRT3/LITAF/RSL1D1/CHEK2/PRELP/EDNRB/AMFR/RBL1/NQO1/PICALM/SERPINE1/ARNTL/CLDN1/TNFRSF1B/SLC12A2/SMC6/ATP8A2/GSN…	102
BP	GO:0030258	lipid modification	96/4196	296/19623	5.73e-06	0.000451131	0.000354277	KL/INPP5J/ACADS/ACAT1/ACAA1/IMPA2/ETFDH/PRKAG2/PLPP1/ST3GAL4/ABO/PPARG/FABP3/HBEGF/KITLG/ACADVL/PPARGC1A/PDGFB/FGFR3/LCK/HADHB/INPP5K/CYP4V2/CPT1A/PPARA/AUH/FGF1/AMACR/FGF8/NR4A3/EPHX2/MLYCD/ZFYVE21/PLPPR1/MTM1/PECR/FGF9/DECR1/ETFBKMT/PIK3CB/SYNJ1/BTC/TMEM150A/FYN/ACAA2/INPP1/ETFB/PHYH/PDK4/ABCG1/ECH1/SCP2/SLC27A2/ERBB2/ERBB3/PIP4K2C/PEX7/FGFR1/ACACB/PLPPR3/INPP5D/CRAT/CROT/ECI1/EFR3A/DGKD/BDH2/P…	96
BP	GO:0003014	renal system process	46/4196	116/19623	5.9e-06	0.000458761	0.000360269	KCNQ1/EDN1/WNK4/AQP3/F2RL1/AQP1/COMT/SGK1/HSD11B2/PDGFB/INPP5K/HYAL2/GAS6/MYO5B/NPR1/GJA5/BTC/AKR1B1/EDNRB/RRM2B/ITGA3/CLDN4/HAS2/GSN/CD34/PCSK5/AKR1C3/STC1/WFS1/GJA1/HBB/ADCY2/CHRNA3/AGTR1/CYBA/ADCY9/ADM/ADCY5/CHRNB4/ADCY4/JCHAIN/BCR/OR51E2/MYO1E/ADCY1/NPR3	46
BP	GO:0071214	cellular response to abiotic stimulus	103/4196	323/19623	6.15e-06	0.000464717	0.000364945	HYAL1/PDE2A/PIEZO1/TLR5/IRF1/ITGA2/TLR3/GATA3/ATP1A1/BCL2L1/AQP1/CD40/TRPV4/MAPK13/MMP7/RAB11FIP5/PDE6G/CRYAB/RAD51/AURKB/GDF1/PBK/PARP1/TGFB1/TSPO/DNM2/BLM/PTGS2/ENG/NPM1/RAD51AP1/MAPK3/SIRT1/GADD45A/HYAL2/HABP4/PKD2/CDC25A/TMEM150C/ECT2/KDM1A/SIPA1/HMGA2/H2AFX/CHEK1/NUCKS1/AKR1B1/CHP1/CHEK2/CASP8AP2/ERRFI1/CASP8/CASP1/RDH11/INTS7/EGR1/RHOB/PCNA/MYLK/RHNO1/BMP6/CRY2/CAMKMT/NFATC4/WRN/USP28/HIST3…	103
BP	GO:0104004	cellular response to environmental stimulus	103/4196	323/19623	6.15e-06	0.000464717	0.000364945	HYAL1/PDE2A/PIEZO1/TLR5/IRF1/ITGA2/TLR3/GATA3/ATP1A1/BCL2L1/AQP1/CD40/TRPV4/MAPK13/MMP7/RAB11FIP5/PDE6G/CRYAB/RAD51/AURKB/GDF1/PBK/PARP1/TGFB1/TSPO/DNM2/BLM/PTGS2/ENG/NPM1/RAD51AP1/MAPK3/SIRT1/GADD45A/HYAL2/HABP4/PKD2/CDC25A/TMEM150C/ECT2/KDM1A/SIPA1/HMGA2/H2AFX/CHEK1/NUCKS1/AKR1B1/CHP1/CHEK2/CASP8AP2/ERRFI1/CASP8/CASP1/RDH11/INTS7/EGR1/RHOB/PCNA/MYLK/RHNO1/BMP6/CRY2/CAMKMT/NFATC4/WRN/USP28/HIST3…	103
BP	GO:0000731	DNA synthesis involved in DNA repair	34/4196	77/19623	6.19e-06	0.000464717	0.000364945	BRIP1/DTL/EXO1/RAD51/PCLAF/XRCC2/BLM/BARD1/RAD51AP1/SIRT1/DNA2/BRCA1/RFC4/RFC3/BRCA2/RFC2/POLD4/UBA7/POLE/PCNA/POLE2/RFC5/RMI2/WRN/POLA1/RMI1/POLD3/POLD1/MAD2L2/UBC/NEXMIF/REV3L/POLN/USP43	34
BP	GO:0034080	CENP-A containing nucleosome assembly	23/4196	44/19623	6.37e-06	0.000467106	0.000366822	HJURP/RBBP4/CENPA/CENPI/KNL1/OIP5/CENPH/NPM1/CENPU/CENPP/MIS18BP1/CENPM/CENPK/CENPL/CENPO/NASP/CENPQ/MIS18A/CENPW/SMARCA5/CENPN/HIST1H4C/ITGB3BP	23
BP	GO:0061641	CENP-A containing chromatin organization	23/4196	44/19623	6.37e-06	0.000467106	0.000366822	HJURP/RBBP4/CENPA/CENPI/KNL1/OIP5/CENPH/NPM1/CENPU/CENPP/MIS18BP1/CENPM/CENPK/CENPL/CENPO/NASP/CENPQ/MIS18A/CENPW/SMARCA5/CENPN/HIST1H4C/ITGB3BP	23
BP	GO:0072331	signal transduction by p53 class mediator	100/4196	312/19623	6.55e-06	0.000474747	0.000372822	MUC1/PPP1R13L/PRKAB1/PRKN/TPX2/HDAC2/PRKAG2/NDRG1/RBBP4/CDC25C/BRIP1/EXO1/AURKB/BCL3/CDK1/E2F7/MSH2/E2F1/BLM/CCNB1/GTSE1/NPM1/BARD1/TOPBP1/CNOT9/CDK2/SPRED1/TAF5/SIRT1/E2F2/GADD45A/AURKA/CENPJ/PRKAA2/CDK5R1/BTG2/DNA2/BRCA1/KDM1A/TP53BP2/BOK/RFC4/CD74/RPS6KA6/RFC3/BRCA2/RFC2/FOXM1/CHEK1/E2F8/SP100/ZNF385B/DYRK2/PCBP4/CHEK2/ZMAT4/FHIT/CNOT6/NUPR1/RRM2B/TFAP4/SUPT16H/PCNA/RHNO1/RNF34/RFC5/RMI2/SSRP1…	100
BP	GO:0033047	regulation of mitotic sister chromatid segregation	30/4196	65/19623	7.27e-06	0.000514912	0.000404364	CDC6/BUB1B/BUB1/NDC80/TTK/CENPF/CENPE/TRIP13/DLGAP5/PTTG1/TACC3/SLF1/CCNB1/UBE2C/RAD21/MAD2L1/PLK1/CDT1/DUSP1/ESPL1/GEN1/H2AFY/TNKS/SLF2/DYNC1LI1/MAD2L2/CDK5RAP2/ANAPC1/TPR/NEK6	30
BP	GO:0000083	regulation of transcription involved in G1/S transition of mitotic cell cycle	17/4196	28/19623	7.29e-06	0.000514912	0.000404364	CDC6/TYMS/ESRRB/ORC1/E2F7/CDC45/E2F1/RRM2/FBXO5/CDT1/E2F6/DHFR/PCNA/POLA1/KLF11/CCNE1/CCNA1	17
BP	GO:0007043	cell-cell junction assembly	49/4196	127/19623	7.35e-06	0.000514912	0.000404364	PRKCH/PARD6A/MPP7/TRPV4/MARVELD3/CDH2/GJC1/PARD6B/MYO1C/CD9/CDH7/ECT2/CDH24/GJA5/PKP4/JUP/CDH1/F11R/PARD6G/HEG1/CLDN1/RHOC/WDR1/RAMP2/FSCN1/PATJ/GJA4/OCLN/CDH13/GJA1/CDH5/CDH10/CDH11/ACTN4/CDH12/UGT8/PARD3/FBF1/CDH15/FZD5/SNAI1/CDH20/CLDN3/WNT11/PKP2/TLN2/CDH8/DLG5/SNAI2	49
BP	GO:0031960	response to corticosteroid	63/4196	176/19623	7.44e-06	0.000516031	0.000405243	EDN1/MAOB/ICAM1/MDK/GPER1/AQP1/TYMS/ALAD/KLF9/PAPPA/HSD11B2/FOSB/IGFBP7/PARP1/TGFB1/PTGS2/GOT1/ZFP36/ENG/CFLAR/AIFM1/DUSP1/CDO1/ATP2B1/FOS/ANXA3/CBX3/ND3/SDC1/ERRFI1/GSTP1/RAN/TFAP4/FECH/PCNA/PDCD7/GLB1/CLDN1/ZFP36L2/BMP6/SLIT2/STAR/AKR1C3/SSTR2/STC1/ANXA1/GBA/CTSV/CASP3/PTAFR/HEY1/DNMT3B/CYBA/ABCA3/CAD/ADM/CTGF/PAM/PTPRU/NR3C1/EGFR/PPARGC1B/DDIT4	63
BP	GO:0048545	response to steroid hormone	129/4196	425/19623	7.6e-06	0.000521484	0.000409525	PAQR5/EDN1/PAQR7/CA2/ESRRA/THRB/MAOB/ICAM1/MDK/ATP1A1/NR4A2/PADI2/GPER1/AQP1/PLPP1/NR4A1/SKP2/PPARG/TYMS/ALAD/KLF9/PPARGC1A/PAQR8/PAPPA/HSD11B2/VDR/ESRRB/FOSB/IGFBP7/PARP1/HMGB2/TGFB1/PPARA/TSPO/PTGS2/GOT1/ZFP36/ENG/NR4A3/TFPI/ESRRG/CFLAR/NR3C2/CNOT9/NR1H2/SIRT1/DDRGK1/TGFBR2/WBP2/NR1D1/AIFM1/PER1/DUSP1/BRCA1/CDO1/ATP2B1/FOS/SPP1/ANXA3/PTGER2/THRA/CBX3/RBFOX2/ND3/SDC1/ERRFI1/CTNNB1/GSTP1/RAN/TFAP…	129
BP	GO:0090068	positive regulation of cell cycle process	96/4196	298/19623	7.84e-06	0.000526768	0.000413674	HYAL1/MUC1/EDN1/NUSAP1/IGF2/SPAG5/CDC25C/CDC6/NDC80/DTL/SPAST/KIF14/AURKB/PDGFB/FAM83D/RACGAP1/DLGAP5/PLK4/CDK1/E2F7/MTBP/CDCA5/TGFB1/CDC45/E2F1/SLF1/CCNB1/KIF20B/GTSE1/NPM1/UBE2C/FGF8/RAD21/RANBP1/CNOT9/MAD2L1/CDK2/PPP2R5B/GADD45A/DDRGK1/AURKA/CENPJ/KIF23/CDK5R1/CDC7/BTG2/PKD2/CDT1/CDC25A/BRCA1/ECT2/POC1A/APP/HMGA2/APEX1/GIPC1/ESPL1/BTC/PHIP/KIF3B/E2F8/PKP4/PCBP4/CHEK2/GEN1/PBX1/CNOT6/H2AFY/DBF4…	96
BP	GO:0001890	placenta development	57/4196	155/19623	7.84e-06	0.000526768	0.000413674	GATA2/TFEB/IGF2/PHLDA2/EPAS1/PPARG/JUNB/SP3/VDR/PDGFB/PLK4/VASH2/E2F7/SOCS3/PTGS2/ST14/RBPJ/PLCD1/PKD2/ITGB8/LIF/SPP1/HS6ST1/E2F8/CASP8/SPINT1/CCNF/CEBPB/HSP90AB1/EPOR/NR2F2/CYR61/CITED1/KRT19/HIF1A/STC2/BMP7/PLAC1/ARID1A/STC1/GJA1/CTSV/KRT8/PPARD/HEY1/NRK/SPINT2/ANG/ADM/FZD5/SNAI1/PCDH12/LEF1/PLCD3/EGFR/VASH1/MDFI	57
BP	GO:0043434	response to peptide hormone	137/4196	457/19623	8.17e-06	0.000539933	0.000424013	CEACAM1/KL/EDN1/TEK/ATP6V1B1/CPEB2/CA2/ESRRA/CISH/ICAM1/TNFSF10/IGF2/ATP6V1C2/TCIRG1/NR4A2/GPER1/NR4A1/RBBP4/CDC6/PPARG/TRPV4/FABP3/BRIP1/GRB14/STAT3/HSD11B2/INPP5K/ATP6V1A/CCNA2/SOCS3/PARP1/LMBRD1/TGFB1/PPARA/PTGS2/GOT1/SMARCC1/TBC1D4/NR4A3/PRKCQ/CFLAR/MAPK3/NFE2L2/STAT5A/MYO1C/SIRT1/ATP6V1E1/CYTB/PRKDC/CDC5L/LEPROT/LYN/BTG2/SOCS1/ATP6V0C/EGR2/CDO1/ATP6V1D/ATP6V0E1/CAV2/ATP6AP1/CAT/APEX1/KHK/PHI…	137
BP	GO:0051304	chromosome separation	35/4196	81/19623	8.21e-06	0.000539933	0.000424013	TOP2A/EME1/CDC6/BUB1B/BUB1/NDC80/TTK/CENPF/CENPE/TRIP13/DLGAP5/NCAPD2/PTTG1/TACC3/CCNB1/RECQL5/UBE2C/RAD21/MAD2L1/PLK1/CDT1/DUSP1/TOP2B/ESPL1/GEN1/SMARCAD1/NCAPD3/DYNC1LI1/MAD2L2/CDK5RAP2/ANAPC1/FANCM/HFM1/TPR/NEK6	35
BP	GO:0070507	regulation of microtubule cytoskeleton organization	67/4196	191/19623	8.5e-06	0.000552975	0.000434255	INPP5J/RASSF7/STMN1/EML2/TPX2/CKAP2/KIF11/SKA3/SPAG5/TRPV4/PARP3/SKA1/CDK2AP2/NEK2/HDGFL3/PSRC1/PLK4/XPO1/SMC3/TACC3/KIF18A/CIB1/NPM1/RANBP1/PLK1/AURKA/CENPJ/CDK5R1/SKA2/RAE1/BORA/BRCA1/CHMP2A/POC1A/STIL/CAMSAP1/CHEK1/FES/GEN1/CTNNB1/CCNF/MID1IP1/SMC1A/SPICE1/KAT2B/MAP1B/ATAT1/CEP97/CLIP3/PHLDB1/PAK1/CCSAP/STMN4/FSD1/CEP76/CDK5RAP2/GPSM2/MAP2/CEP85/GNAI1/MET/TPR/MAPT/SNCA/CEP131/EPHA3/RGS2	67
BP	GO:0001570	vasculogenesis	34/4196	78/19623	8.74e-06	0.000562874	0.000442029	CEACAM1/RASIP1/SOX17/JUNB/GJC1/TGFB1/ENG/TIE1/SPRED1/TGFBR2/SOX18/EGFL7/CTNNB1/HEG1/ITGAV/CITED1/HAS2/RAMP2/FLT4/FLT1/CD34/TEAD2/KDR/GLMN/WT1/HEY1/PAXIP1/HHEX/ADM/TGFBR3/TMEM100/APLNR/VEGFA/MYO1E	34
BP	GO:0048608	reproductive structure development	133/4196	443/19623	1.01e-05	0.000647251	0.000508291	GATA2/TFEB/NOS3/TLR5/SERPINA5/FSTL3/TLR3/ICAM1/GATA3/TNFSF10/IGF2/PHLDA2/EPAS1/BCL2L1/PPARG/BRIP1/JUNB/KITLG/ARRB1/SP3/VDR/PDGFB/ASPM/PLK4/VASH2/E2F7/SOCS3/KIF18A/HMGB2/MSH2/PCYT1B/PTGS2/SMARCC1/FGF8/ADGRG1/NUP107/ST14/SIRT1/RBPJ/PLCD1/PKD2/ITGB8/LIF/FGF9/CHD7/BOK/BMPR1B/SPP1/BRCA2/FANCG/HS6ST1/SIX4/MMP19/IRX5/E2F8/RRM1/ROR2/KDM5B/NASP/SDC1/CASP8/AMHR2/SPINT1/NUPR1/CTNNB1/CCNF/ADAMTS1/ROBO2/CEBPB…	133
BP	GO:0072028	nephron morphogenesis	36/4196	85/19623	1.06e-05	0.000669784	0.000525986	WNK4/GATA3/HNF1B/SIX1/EYA1/SIX2/TGFB1/FGF1/FGF8/PKD2/LIF/NPNT/ADAMTS16/SIX4/IRX3/PBX1/CTNNB1/CITED1/GLI3/KIF26B/LAMA5/BMP7/LGR4/STAT1/OSR1/WT1/GDNF/SALL1/HOXA11/VEGFA/PGF/HOXB7/DCHS1/WNT11/GREM1/FOXD1	36
BP	GO:0006979	response to oxidative stress	144/4196	487/19623	1.08e-05	0.000673294	0.000528742	HYAL1/SGK2/EDN1/PTK2B/ZC3H12A/NOS3/CPEB2/SOD2/LRRK2/KLF2/PRKN/IL18BP/HDAC2/PTGS1/ETFDH/NR4A2/NONO/EPAS1/AQP1/ETV5/PRR5L/MAPK13/ALAD/MELK/PPARGC1A/CRYAB/MYB/NCOA7/SOD3/PXDN/CDK1/CCNA2/NEIL1/PARP1/PSIP1/RBPMS/DNM2/PTGS2/FGF8/NR4A3/STX4/CFLAR/MAPK3/NFE2L2/CDK2/EZH2/SIRT1/KLF4/HYAL2/NAPRT/AIFM1/MAP1LC3A/ND5/PKD2/GPX3/ENDOG/FANCD2/DUSP1/ECT2/COX1/FOS/APP/CAT/APEX1/KPNA4/ND6/PXN/ND3/ND1/MSRA/TXNRD2/SDC…	144
BP	GO:0070482	response to oxygen levels	127/4196	420/19623	1.09e-05	0.000675885	0.000530777	EDN1/TEK/AQP3/PTK2B/CPEB2/PLAU/ITGA2/ATP1B1/ICAM1/PSMB10/HDAC2/CPEB4/NR4A2/NDRG1/EPAS1/AQP1/PPARG/BRIP1/ALAD/PPARGC1A/CRYAB/MYB/HSD11B2/SOD3/ATP6V1A/CCNA2/TGFB1/PPARA/E2F1/SUV39H2/PTGS2/CCNB1/ND4/DNMT3A/CFLAR/PSMB9/NFE2L2/DDAH1/SIRT1/VASN/ATP6/CYTB/TGFBR2/CCDC115/AIFM1/RBPJ/ND5/ENDOG/ATP6AP1/CAT/PSMB8/ACAA2/DPP4/CHRNA7/CASP1/TMBIM6/HMOX2/AGTRAP/PINK1/EGR1/HIF1A/THBS1/RAMP2/CUL2/TLR2/CXCR4/ACVRL1/…	127
BP	GO:0007091	metaphase/anaphase transition of mitotic cell cycle	25/4196	51/19623	1.12e-05	0.00068477	0.000537755	CDC6/BUB1B/BUB1/NDC80/TTK/CENPF/CENPE/TRIP13/DLGAP5/TACC3/CCNB1/UBE2C/RAD21/MAD2L1/PLK1/CDT1/DUSP1/ESPL1/GEN1/DYNC1LI1/MAD2L2/CDK5RAP2/ANAPC1/TPR/NEK6	25
BP	GO:0010965	regulation of mitotic sister chromatid separation	26/4196	54/19623	1.14e-05	0.00068477	0.000537755	CDC6/BUB1B/BUB1/NDC80/TTK/CENPF/CENPE/TRIP13/DLGAP5/PTTG1/TACC3/CCNB1/UBE2C/RAD21/MAD2L1/PLK1/CDT1/DUSP1/ESPL1/GEN1/DYNC1LI1/MAD2L2/CDK5RAP2/ANAPC1/TPR/NEK6	26
BP	GO:0034502	protein localization to chromosome	35/4196	82/19623	1.14e-05	0.00068477	0.000537755	HIST1H1B/CENPA/BUB1B/NDC80/PARP3/TTK/AURKB/H2AFY2/KNL1/CDK1/MTBP/GNL3/ESCO2/CDCA5/SLF1/SPDL1/RAD21/HASPIN/EZH2/PLK1/CDT1/CCT2/CCT4/BRCA2/BOD1/H2AFY/TNKS/TCP1/TEX15/SLF2/CCT5/CCT6A/RCC2/CENPQ/CHAMP1	35
BP	GO:0031577	spindle checkpoint	19/4196	34/19623	1.15e-05	0.00068477	0.000537755	NDRG1/BUB1B/BUB1/NDC80/TTK/CENPF/TRIP13/AURKB/SPDL1/CCNB1/MAD2L1/PLK1/CDT1/DUSP1/GEN1/DYNC1LI1/MAD2L2/CDK5RAP2/TPR	19
BP	GO:0050808	synapse organization	102/4196	324/19623	1.25e-05	0.000741069	0.000581966	LRRK2/ADGRF1/LZTS3/SIX1/ETV5/CDC20/L1CAM/CDH2/ARC/SHANK2/ADNP/ARHGEF15/SPTBN2/CDK5R1/APP/FXR1/RAB29/FBXO45/LRRN1/SLIT1/FYN/SIX4/LRTM2/CDH1/CHRNA7/SNCG/CTTN/CHRNA1/CTNNB1/RER1/ROBO2/CAPRIN1/TIAM1/EFNA1/ELFN1/SYNPO/AGRN/ERBB2/ITGA3/UBE2V2/NPTN/DNM3/KLK8/ANK3/TLR2/NFATC4/ABHD17B/EPHB3/NRXN2/LINGO2/SHANK3/SRPX2/AMIGO2/ARHGAP44/IGSF9/LRRTM1/PCDHB10/LRP4/CACNB3/NRXN1/ADGRB2/UTRN/PTPRD/NRCAM/CHRNB1/LAMB…	102
BP	GO:0061458	reproductive system development	133/4196	446/19623	1.46e-05	0.000847868	0.000665837	GATA2/TFEB/NOS3/TLR5/SERPINA5/FSTL3/TLR3/ICAM1/GATA3/TNFSF10/IGF2/PHLDA2/EPAS1/BCL2L1/PPARG/BRIP1/JUNB/KITLG/ARRB1/SP3/VDR/PDGFB/ASPM/PLK4/VASH2/E2F7/SOCS3/KIF18A/HMGB2/MSH2/PCYT1B/PTGS2/SMARCC1/FGF8/ADGRG1/NUP107/ST14/SIRT1/RBPJ/PLCD1/PKD2/ITGB8/LIF/FGF9/CHD7/BOK/BMPR1B/SPP1/BRCA2/FANCG/HS6ST1/SIX4/MMP19/IRX5/E2F8/RRM1/ROR2/KDM5B/NASP/SDC1/CASP8/AMHR2/SPINT1/NUPR1/CTNNB1/CCNF/ADAMTS1/ROBO2/CEBPB…	133
BP	GO:0051017	actin filament bundle assembly	57/4196	158/19623	1.52e-05	0.000847868	0.000665837	RAPGEF3/PTK2B/STMN1/PRKN/SDC4/ARRB1/CARMIL1/ARHGEF10L/RHOD/INPP5K/MARCKS/ARHGEF15/EZR/ADD2/S1PR1/ARHGAP6/TNFAIP1/S100A10/PLS1/PHACTR1/EPHA1/PXN/DMTN/RHOBTB1/EVL/SYNPO/RHOB/SHROOM1/RHOC/FSCN1/SWAP70/ITGB1BP1/PPM1E/SHANK3/SYNPO2/PAK1/PLS3/RGCC/SPIRE2/ITGB5/ACTN4/DPYSL3/SLC9A1/ID1/PDXP/ARHGEF5/SH3PXD2B/MET/LIMA1/RHOF/CTGF/NEDD9/ALMS1/WNT11/LCP1/SORBS3/BAIAP2L2	57
BP	GO:0010952	positive regulation of peptidase activity	73/4196	216/19623	1.53e-05	0.000847868	0.000665837	CTSH/CASP10/ROBO1/TRADD/TNFSF10/GPER1/PPARG/TBC1D10A/ARRB1/STAT3/CYFIP2/LCK/CASP4/HMGB1/ANTXR1/CFLAR/MAPK3/SIRT1/DDRGK1/LYN/AIFM1/LGALS9/ANP32B/MUL1/BOK/APP/F3/MBP/FYN/SENP1/NEK5/HSPD1/CASP8AP2/CASP8/CASP1/PINK1/PICALM/TFAP4/EFNA1/NLRP1/MAP3K5/CYR61/IFI27/IFI27L2/CASP7/GSN/PSME4/PERP/TNFSF15/PSME1/CASC2/CRADD/EFNA3/NGFR/CASP3/NOD1/CASP2/DAPK1/TNFRSF10B/FIS1/EGLN3/CYCS/CTGF/GRIN2B/MAPK12/FAM162A/P…	73
BP	GO:0061138	morphogenesis of a branching epithelium	73/4196	216/19623	1.53e-05	0.000847868	0.000665837	EDN1/NTN4/CTSH/RASIP1/HNF1B/TGM2/SIX1/EYA1/ESRP2/ETV5/SIX2/VDR/SOCS3/B4GALT1/TGFB1/ENG/FGF1/FGF8/ST14/CSF1/TGFBR2/CTSZ/NOTCH4/MYCN/PKD2/NPNT/ADAMTS16/SIX4/TIMELESS/KDM5B/PBX1/SPINT1/CTNNB1/VANGL2/CITED1/FGFR1/GLI3/LRP6/NFATC4/SLIT2/GBX2/LAMA5/BMP7/LGR4/PAK1/SEMA3C/WT1/PDGFA/AR/CELSR1/SPINT2/GDNF/HHEX/MET/ADM/GDF7/SEMA3A/SALL1/FOXC2/HOXA11/FZD5/VEGFA/PGF/HOXB7/LEF1/DCHS1/HGF/GREM1/DLL4/HOXD13/DLG5…	73
BP	GO:1900182	positive regulation of protein localization to nucleus	30/4196	67/19623	1.53e-05	0.000847868	0.000665837	ZC3H12A/LRRK2/IPO5/CDK1/TGFB1/PTGS2/GTSE1/PLK1/HYAL2/GLIS2/LIF/ECT2/TRIM8/CCT2/CCT4/FYN/JUP/HSP90AB1/TCP1/CCT5/CCT6A/CARD10/TMEM173/CCT3/GLI3/CD2AP/PARP9/NGFR/PRKCD/TPR	30
BP	GO:0006275	regulation of DNA replication	49/4196	130/19623	1.54e-05	0.000847868	0.000665837	CCDC88A/CDC6/KITLG/DACH1/PDGFB/CDK1/E2F7/SMC3/BCL6/ESCO2/TGFB1/BLM/DSCC1/CDK2/TICRR/TNFAIP1/CDC7/ZRANB3/CDT1/DNA2/RFC4/RFC3/BRCA2/RFC2/NUCKS1/E2F8/DONSON/TIMELESS/CHEK2/DBF4/DHX9/DBF4B/PCNA/SMC1A/RFC5/BMP6/FGFR1/ZBTB38/ACVRL1/CHTF18/LIG3/EHMT2/CACYBP/PDGFC/CST3/PDGFA/S100A11/EGFR/USP37	49
BP	GO:0071459	protein localization to chromosome, centromeric region	15/4196	24/19623	1.55e-05	0.000847868	0.000665837	CENPA/BUB1B/NDC80/TTK/AURKB/KNL1/CDK1/MTBP/SPDL1/HASPIN/CDT1/BOD1/RCC2/CENPQ/CHAMP1	15
BP	GO:0009142	nucleoside triphosphate biosynthetic process	62/4196	176/19623	1.56e-05	0.000847868	0.000665837	OGDHL/AK7/CHCHD10/TCIRG1/PFKFB3/PRKAG2/ATP5S/TYMS/PPARGC1A/STAT3/ESRRB/PARP1/TGFB1/PPARA/ATP8/NUP107/BPGM/ATP6/PRKAA2/RAE1/NUP58/NUP160/NUP205/CTPS2/NUP155/GALK1/NDC1/ATP5F1D/VPS9D1/NUP153/OGDH/PINK1/AK8/SUCLG1/NME3/NME5/NUP133/UCK2/HIF1A/SURF1/HK2/ATP5MC1/PFKL/ENTPD5/CTPS1/CMPK1/ATP5PD/GCK/PFKFB2/DTYMK/NME1/CAD/CYC1/HKDC1/ENO1/ALDOA/TPR/PFKP/POM121C/COX5B/NUP210/DDIT4	62
BP	GO:0044843	cell cycle G1/S phase transition	99/4196	314/19623	1.56e-05	0.000847868	0.000665837	HYAL1/MUC1/SKP2/CDC25C/CDC6/MCM6/TYMS/CDK2AP2/KIF14/MCM7/ESRRB/FAM83D/MCM2/MCM10/ORC1/CDK1/E2F7/CCNA2/MCM4/MTBP/CDC45/E2F1/ACVR1B/CCNB1/RRM2/GTSE1/NPM1/FBXO5/RANBP1/NACC2/CNOT9/CDK2/EZH2/GADD45A/DDRGK1/AURKA/KLF4/CENPJ/PRKDC/PRIM2/CDC7/ORC6/BTG2/CCNE2/PKD2/IQGAP3/JADE1/CDT1/CDC25A/CDKN3/APEX1/MCM3/TRIM71/E2F8/PCBP4/SUSD2/CHEK2/NASP/DBF4/CNOT6/RBL1/E2F6/POLE3/POLE/CACUL1/DHFR/PCNA/PRIM1/TCIM/POLE2…	99
BP	GO:0072088	nephron epithelium morphogenesis	35/4196	83/19623	1.57e-05	0.000847868	0.000665837	WNK4/GATA3/HNF1B/SIX1/EYA1/SIX2/TGFB1/FGF1/FGF8/PKD2/LIF/NPNT/ADAMTS16/SIX4/IRX3/PBX1/CTNNB1/CITED1/GLI3/KIF26B/LAMA5/LGR4/STAT1/OSR1/WT1/GDNF/SALL1/HOXA11/VEGFA/PGF/HOXB7/DCHS1/WNT11/GREM1/FOXD1	35
BP	GO:0000082	G1/S transition of mitotic cell cycle	94/4196	295/19623	1.58e-05	0.000849519	0.000667133	HYAL1/MUC1/SKP2/CDC25C/CDC6/MCM6/TYMS/CDK2AP2/KIF14/MCM7/ESRRB/MCM2/MCM10/ORC1/CDK1/E2F7/MCM4/MTBP/CDC45/E2F1/ACVR1B/CCNB1/RRM2/GTSE1/NPM1/FBXO5/RANBP1/NACC2/CNOT9/CDK2/EZH2/GADD45A/AURKA/KLF4/CENPJ/PRKDC/PRIM2/CDC7/ORC6/BTG2/CCNE2/PKD2/IQGAP3/JADE1/CDT1/CDC25A/CDKN3/APEX1/MCM3/TRIM71/E2F8/PCBP4/CHEK2/NASP/DBF4/CNOT6/RBL1/E2F6/POLE3/POLE/CACUL1/DHFR/PCNA/PRIM1/POLE2/CUL2/PPAT/CDK4/LSM11/POLA1/KLF…	94
BP	GO:0032970	regulation of actin filament-based process	120/4196	396/19623	1.69e-05	0.000893627	0.000701772	SCIN/EDN1/RAPGEF3/TEK/EPS8L2/PLEKHH2/PTK2B/TRPM4/ACTR3C/STMN1/F2RL1/CCDC88A/ICAM1/KANK3/PRKN/ATP1A1/WASF1/SDC4/CARMIL1/ARHGEF10L/RHOD/INPP5K/SSH3/ARHGAP18/CAPG/TGFB1/ARPC1B/TMSB15B/ARHGEF15/MYO1C/VASP/RNF207/SPTBN2/ADD2/S1PR1/ARHGAP6/CDK5R1/S100A10/ABI2/TMSB15B/EPHA1/GJA5/TMSB15A/PXN/DMTN/RHOBTB1/JUP/EPS8L1/F11R/FES/CTTN/VANGL2/EVL/SYNPO/DSTN/RHOB/JAM3/RHOC/CDC42EP2/PDPN/WDR1/FSCN1/GSN/SWAP70/SLI…	120
BP	GO:0033627	cell adhesion mediated by integrin	27/4196	58/19623	1.7e-05	0.000893627	0.000701772	MUC1/PIEZO1/PLAU/ITGA2/ICAM1/CIB1/LYN/NPNT/DPP4/LPXN/SERPINE1/EFNA1/ITGAV/SWAP70/ITGB1BP1/PTPN6/PODXL/ITGA11/CYP1B1/NEXMIF/CCL21/CCL5/FOXC2/ACER2/NOV/SNAI2/PIK3CG	27
BP	GO:0044784	metaphase/anaphase transition of cell cycle	25/4196	52/19623	1.73e-05	0.000902593	0.000708813	CDC6/BUB1B/BUB1/NDC80/TTK/CENPF/CENPE/TRIP13/DLGAP5/TACC3/CCNB1/UBE2C/RAD21/MAD2L1/PLK1/CDT1/DUSP1/ESPL1/GEN1/DYNC1LI1/MAD2L2/CDK5RAP2/ANAPC1/TPR/NEK6	25
BP	GO:0044262	cellular carbohydrate metabolic process	88/4196	273/19623	1.79e-05	0.000927012	0.000727989	PTK2B/RBKS/B3GALT4/PRKN/IGF2/IMPA2/PHLDA2/PFKFB3/PRKAG2/B3GNT2/GPER1/FUK/PPP1R1A/PPARGC1A/ITPK1/STAT3/ESRRB/SLC5A3/PPP1CC/INPP5K/B4GALT1/PPARA/GOT1/C1QTNF1/MLYCD/IDNK/GAA/BPGM/SIRT1/PTH1R/NR1D1/GK5/ADCYAP1R1/GNPTG/SYNJ1/IDH2/KHK/SLC45A3/TKFC/AKR1B1/INPP1/GALK1/DYRK2/GNE/ENOSF1/LEPR/PDK4/MANBA/KAT2B/GLB1/GK/HAS2/ACACB/HK2/HS2ST1/B3GNT9/IL6ST/PGGHG/MST1/PYGB/B3GNT5/MTMR7/IGFBP4/PPP1R3B/UBC/IDUA/GCK…	88
BP	GO:0006066	alcohol metabolic process	109/4196	354/19623	1.9e-05	0.000978996	0.000768813	DEGS2/INPP5J/PTK2B/MVK/SPR/ACSS1/APOL1/ACAT1/IMPA2/GPER1/ALDH1A1/RETSAT/ACADVL/ITPK1/VDR/SLC5A3/INPP5K/SCD/SGPP1/ADH1B/GOT1/FGF1/EPHX2/PTH1R/PRKAA2/PLCD1/GK5/ADCYAP1R1/RDH13/APOL2/KPNB1/SCARF1/PECR/APP/CYP27C1/SYNJ1/CAT/TKFC/ACAA2/AKR1B1/INPP1/GALK1/PCBD2/PLCG2/CYB5R3/LEPR/RDH11/ABCG1/RAN/LDLRAP1/DHFR/ALDH3B1/CYP39A1/GK/OSBPL5/ALDH2/FDX1/FGFR1/ACACB/PLCG1/DISP3/INPP5D/STAR/PMVK/NFKB1/AKR1C3/DHCR2…	109
BP	GO:0008608	attachment of spindle microtubules to kinetochore	19/4196	35/19623	2.01e-05	0.00102541	0.00080526	SPAG5/NDC80/SGO1/CENPE/AURKB/NEK2/RACGAP1/KNL1/KIF2C/NUF2/CCNB1/KNSTRN/CDT1/ECT2/DSN1/BOD1/RCC2/CHAMP1/SIRT2	19
BP	GO:0001763	morphogenesis of a branching structure	76/4196	229/19623	2.13e-05	0.00107669	0.000845534	EDN1/NTN4/CTSH/LRRK2/RASIP1/HNF1B/TGM2/SIX1/EYA1/ESRP2/ETV5/SIX2/VDR/SOCS3/B4GALT1/TGFB1/ENG/FGF1/FGF8/ST14/CSF1/TGFBR2/CTSZ/NOTCH4/MYCN/PKD2/NPNT/RTN4/ADAMTS16/SIX4/TIMELESS/KDM5B/PBX1/SPINT1/CTNNB1/VANGL2/COL13A1/CITED1/FGFR1/GLI3/LRP6/NFATC4/SLIT2/GBX2/LAMA5/BMP7/LGR4/PAK1/SEMA3C/WT1/PDGFA/AR/CELSR1/SPINT2/GDNF/HHEX/MET/ADM/GDF7/SEMA3A/SALL1/FOXC2/HOXA11/FZD5/VEGFA/PGF/HOXB7/LEF1/DCHS1/HGF/GRE…	76
BP	GO:1901654	response to ketone	67/4196	196/19623	2.22e-05	0.00111601	0.000876407	EDN1/KLF2/MAOB/ICAM1/BCL2L1/AQP1/PPARG/TYMS/KLF9/DCPS/FOSB/IGFBP7/PARP1/TGFB1/TSPO/CFLAR/SIRT1/KLF4/TBXA2R/PRKAA2/CDC5L/WBP2/AIFM1/AHR/DUSP1/ATP2B1/FOS/SPP1/PTGER2/CBX3/AKR1B1/NASP/ERRFI1/TFAP4/FECH/PCNA/GLB1/CLDN1/CLDN4/THBS1/FDX1/RAMP2/TLR2/SLIT2/STAR/CDK4/TXNIP/GBA/ADCY2/PTAFR/AR/GNAI1/DNMT3B/CYBA/NME1/CAD/CCL21/TGFBR3/MSN/ADCY5/SREBF1/CATSPER2/NR3C1/EGFR/HOXD13/ADCY1/DDIT4	67
BP	GO:1990778	protein localization to cell periphery	92/4196	290/19623	2.35e-05	0.0011701	0.000918888	ATP1B1/PRKCH/BCL2L1/GPER1/ARHGEF16/KCNIP4/TMEM88/CDH2/INPP5K/SKAP1/TSPAN33/SQSTM1/TGFB1/CIB1/ANLN/STX4/EZR/PKDCC/S100A10/GAS6/RTKN2/PLS1/VAMP8/RILPL2/RAB29/OPTN/TMEM150A/RAP2A/LIN7A/VAMP2/SAPCD2/JUP/CDH1/TTC7A/F11R/PPP2R5A/LYPD1/TMBIM1/RER1/MAP7/LDLRAP1/PICALM/TMEM59/EHD3/TSPAN15/ATP1B3/ITGA3/FLOT2/RAMP2/ANK3/LRP6/RTKN/RAB40B/CLIP3/ANXA2/LAMA5/EFR3A/RAMP1/ARHGAP44/DAB2/ZDHHC22/CACNB3/GPSM2/AKAP5/…	92
BP	GO:0072525	pyridine-containing compound biosynthetic process	51/4196	139/19623	2.47e-05	0.00122065	0.000958585	OGDHL/PDXK/PFKFB3/PRKAG2/NMRK1/PPARGC1A/STAT3/ESRRB/PPARA/PTGS2/NUP107/BPGM/PNP/PRKAA2/NAPRT/PARP10/RAE1/NUP58/NUP160/PNPO/IDH2/NUP205/NUP155/GALK1/PSAT1/NDC1/NUP153/NNMT/OGDH/NADSYN1/NMNAT3/NUP133/HIF1A/NAMPT/HK2/PFKL/ENTPD5/GCK/PARP9/PFKFB2/HKDC1/ENO1/HAAO/ALDOA/ME1/TPR/PFKP/POM121C/RNLS/NUP210/DDIT4	51
BP	GO:0043486	histone exchange	27/4196	59/19623	2.49e-05	0.00122271	0.000960205	HJURP/RBBP4/CENPA/CENPI/KNL1/OIP5/CENPH/NPM1/CENPU/CENPP/MIS18BP1/CENPM/ANP32B/CENPK/CENPL/CENPO/NASP/CENPQ/MIS18A/CENPW/SMARCA5/PSME4/VPS72/CENPN/ANP32E/HIST1H4C/ITGB3BP	27
BP	GO:0051306	mitotic sister chromatid separation	26/4196	56/19623	2.56e-05	0.00124753	0.000979695	CDC6/BUB1B/BUB1/NDC80/TTK/CENPF/CENPE/TRIP13/DLGAP5/PTTG1/TACC3/CCNB1/UBE2C/RAD21/MAD2L1/PLK1/CDT1/DUSP1/ESPL1/GEN1/DYNC1LI1/MAD2L2/CDK5RAP2/ANAPC1/TPR/NEK6	26
BP	GO:0071236	cellular response to antibiotic	54/4196	150/19623	2.69e-05	0.00129883	0.00101998	ZC3H12A/LRRK2/KLF2/IL18BP/HDAC2/AQP1/HNRNPA1/MAPK13/MYB/PDGFB/CDK1/NR4A3/DNMT3A/NFE2L2/EZH2/SIRT1/KLF4/AIFM1/MAP1LC3A/AHR/ENDOG/ECT2/APEX1/TIMELESS/STAT6/NQO1/PINK1/EGR1/CLU/RHOB/PCNA/PSAP/MAP3K5/PLA2G4A/FDX1/STAR/DDX11/ANXA1/SPI1/CST3/ADCY2/SLC9A1/HSPH1/TP53INP1/GNAI1/CYP1B1/MET/ADCY5/PRKCD/TNFAIP3/HGF/PYCR1/ADCY1/KCNMB1	54
BP	GO:0072171	mesonephric tubule morphogenesis	31/4196	72/19623	2.89e-05	0.0013838	0.00108671	GATA3/HNF1B/SIX1/EYA1/SIX2/TGFB1/FGF1/FGF8/PKD2/NPNT/ADAMTS16/SIX4/PBX1/CTNNB1/CITED1/GLI3/KIF26B/LAMA5/LGR4/OSR1/WT1/GDNF/SALL1/HOXA11/VEGFA/PGF/HOXB7/DCHS1/WNT11/GREM1/FOXD1	31
BP	GO:0007163	establishment or maintenance of cell polarity	72/4196	216/19623	2.94e-05	0.00139725	0.00109727	TEK/PTK2B/GATA3/PARD6A/AQP1/LLGL2/SPAG5/CENPA/MPP7/NDC80/WWC1/MYO9A/RHOD/KIF2C/SPDL1/KIF20B/PARD6B/CKAP5/SCARF1/DOCK8/FOXJ1/RHOBTB1/LIN7A/SAPCD2/PTK7/PARD6G/VANGL2/MAP7/RHOB/MTCL1/MAP1B/JAM3/FLOT2/RHOC/WDR1/FSCN1/GSN/KIF26B/AMOTL1/PAK1/SPN/LMNA/CDK5RAP2/GPSM2/MAP2/CDH5/UST/SLC9A1/RHOJ/MYH9/RHOV/PARD3/FBF1/SH3BP1/SPINT2/CCL21/MSN/LLGL1/SYNE2/RHOF/RHOU/OPHN1/RIPOR2/WNT11/DST/FEZ1/AMOTL2/DLG4/BRSK1/…	72
BP	GO:0048771	tissue remodeling	63/4196	183/19623	3.01e-05	0.00140134	0.00110048	CEACAM1/ELF3/PTK2B/NOS3/TNFRSF11B/CA2/TGM2/EPAS1/VDR/HMGB1/B4GALT1/TGFB1/FGF8/ERG/PTH1R/S1PR1/RBPJ/LIF/CHD7/ATP6AP1/SPP1/GJA5/MITF/CAPN1/ACVR2B/LEPR/PDK4/TMBIM1/CTNNB1/PLEKHM1/HIF1A/FLT4/LRP6/NOTCH2/SYT7/INPP5D/SUCO/ACVRL1/MERTK/LGR4/SEMA3C/ANXA1/GJA1/NOL3/RAC2/CST3/NCDN/GPNMB/BGN/EFNA4/FOXC2/TNFAIP3/THBS4/IL18/EGFR/BCR/GREM1/DLL4/IGFBP5/CALCA/PPARGC1B/CSPG4/LRRK1	63
BP	GO:0031099	regeneration	66/4196	194/19623	3.02e-05	0.00140134	0.00110048	NREP/FZD7/PPARG/TYMS/NINJ1/CDK1/CCNA2/TGFB1/MAP4K4/TSPO/CCNB1/NFKBIA/NR4A3/CFLAR/EZH2/AURKA/KLF4/CYTB/TGFBR2/GAS6/CPQ/SCARF1/PRPS2/RTN4/SPP1/HFE/ANXA3/ATIC/PTPN3/RGMA/NNMT/GSTP1/CEBPB/DHFR/PCNA/CLDN1/JAM3/KLK8/RTN4R/GLI3/GSN/PPAT/THY1/ADAM15/CDK4/EPPK1/BCL9/ANXA1/GJA1/LAMB2/PPARD/CAD/ADM/TGFBR3/PTPRU/PGF/HGF/ERBB4/FZD9/EGFR/INPP5F/LCP1/NOV/UCP2/POSTN/MATN2	66
BP	GO:0018210	peptidyl-threonine modification	53/4196	147/19623	3.03e-05	0.00140134	0.00110048	GALNT14/LRRK2/GALNT15/PRKAG2/GALNT3/TTK/INPP5K/GALNT18/CDK1/TGFB1/ACVR1B/HASPIN/DCLK3/SPRED1/PLK1/TGFBR2/CDK5R1/GALNT6/APP/DMTN/CHEK1/GALNT1/CHEK2/SBK1/TNKS/SPRED2/KCNA6/VRK1/BMP7/STOX1/PNCK/MAP3K10/CAMKK1/STK39/OSR1/MYLK2/GALNT12/GALNT11/PRKD1/PARD3/GALNT17/CAD/TNKS1BP1/CALM1/PRKCD/SIRT2/GALNT7/WNK3/CAMK2B/TRIM6/CAMK1D/GALNT13/DDIT4	53
BP	GO:0019216	regulation of lipid metabolic process	115/4196	381/19623	3.03e-05	0.00140134	0.00110048	CEACAM1/ACSL1/TEK/PTK2B/MVK/PIK3IP1/WDR91/ATP1A1/PRKAG2/GPER1/PLPP1/PPARG/FABP3/G0S2/ACADVL/PPARGC1A/VDR/PDGFB/FGFR3/SCD/PDHA1/IGFBP7/PNPLA2/CREBL2/TGFB1/CPT1A/PPARA/TSPO/PTGS2/FGF1/NR4A3/GRHL1/EPHX2/MLYCD/ALAS1/NR1H2/SIRT1/KLF4/PRKAA2/NR1D1/LYN/CD81/KPNB1/BRCA1/ETFBKMT/OPA3/THRA/SLC45A3/VAV3/ADGRF5/ELOVL5/HSD17B13/PPP2R5A/PDK4/RBL1/H2AFY/ABCG1/MID1IP1/RAN/LDLRAP1/PDP1/EGR1/LACTB/PSAP/CYR61/ADRA2…	115
BP	GO:0032886	regulation of microtubule-based process	73/4196	220/19623	3.08e-05	0.00141343	0.00110998	INPP5J/RASSF7/STMN1/EML2/TPX2/CKAP2/KIF11/SKA3/SPAG5/TRPV4/PARP3/SKA1/CDK2AP2/NEK2/HDGFL3/PSRC1/PLK4/XPO1/SMC3/TACC3/KIF18A/CIB1/NPM1/RANBP1/PLK1/AURKA/CENPJ/CDK5R1/SKA2/RAE1/BORA/BRCA1/CHMP2A/POC1A/STIL/ARMC4/CAMSAP1/CHEK1/FES/GEN1/DNAAF1/CTNNB1/CCNF/MID1IP1/SMC1A/SPICE1/CNIH2/KAT2B/MAP1B/ERBB2/LAMP1/ATAT1/CEP97/CLIP3/PHLDB1/PAK1/CCSAP/STMN4/FSD1/CEP76/CDK5RAP2/GPSM2/MAP2/CEP85/GNAI1/MET/TPR/FEZ…	73
BP	GO:0034501	protein localization to kinetochore	13/4196	20/19623	3.2e-05	0.00146024	0.00114673	BUB1B/NDC80/TTK/AURKB/KNL1/CDK1/MTBP/SPDL1/HASPIN/CDT1/RCC2/CENPQ/CHAMP1	13
BP	GO:1902969	mitotic DNA replication	9/4196	11/19623	3.33e-05	0.00150087	0.00117865	RAD51/BCL6/CDC45/GINS1/BRCA2/GINS2/CHEK2/FGFR1/LIG1	9
BP	GO:0009141	nucleoside triphosphate metabolic process	112/4196	370/19623	3.34e-05	0.00150087	0.00117865	OGDHL/ATP6V1B1/AK7/LRRK2/ATP1B1/CHCHD10/TCIRG1/PFKFB3/PRKAG2/ATP5S/GIMAP7/NFS1/TYMS/SDHA/PPARGC1A/STAT3/ESRRB/MOCS2/CDK1/ATP6V1A/PARP1/TGFB1/PPARA/MSH2/TSPO/CCNB1/ND4/ND4L/ATP8/COQ9/NUP107/BPGM/ATP6/CYTB/PRKAA2/ND5/RAE1/NUP58/NUP160/COX1/NDUFV1/COX3/NUP205/CTPS2/COX2/ND6/MOCS1/ND3/ND1/NUP155/GALK1/NDUFS7/NDC1/ATP5F1D/VPS9D1/NUP153/OGDH/ND2/RAN/RRM2B/PINK1/AK8/SUCLG1/NME3/FAM20C/NME5/OLA1/NUP133/B…	112
BP	GO:1903829	positive regulation of cellular protein localization	114/4196	378/19623	3.41e-05	0.0015196	0.00119335	RAPGEF3/ZC3H12A/LRRK2/CCDC88A/PRKCH/PRKN/PARD6A/GPER1/ARHGEF16/PRR5L/HNMT/NDC80/CDKL2/IPO5/TMEM30B/CDK1/SQSTM1/GNL3/TGFB1/CIB1/E2F1/NECAB2/STOM/PTGS2/KIF20B/GTSE1/STX4/MYO1C/EZR/DDRGK1/PLK1/EDEM2/HYAL2/CDK5R1/PRELID3A/LEPROT/GAS6/GLIS2/PLS1/CDT1/SAE1/LIF/ECT2/ANP32B/TRIM8/TP53BP2/CTDSPL2/RTN4/MIEF2/CCT2/CCT4/RAB29/FYN/VAMP2/YWHAQ/CHP1/JUP/CASP8/RER1/HSP90AB1/PINK1/TCP1/CCT5/MTCL1/PLAGL2/CCT6A/ERB…	114
BP	GO:0061572	actin filament bundle organization	57/4196	162/19623	3.49e-05	0.00154627	0.0012143	RAPGEF3/PTK2B/STMN1/PRKN/SDC4/ARRB1/CARMIL1/ARHGEF10L/RHOD/INPP5K/MARCKS/ARHGEF15/EZR/ADD2/S1PR1/ARHGAP6/TNFAIP1/S100A10/PLS1/PHACTR1/EPHA1/PXN/DMTN/RHOBTB1/EVL/SYNPO/RHOB/SHROOM1/RHOC/FSCN1/SWAP70/ITGB1BP1/PPM1E/SHANK3/SYNPO2/PAK1/PLS3/RGCC/SPIRE2/ITGB5/ACTN4/DPYSL3/SLC9A1/ID1/PDXP/ARHGEF5/SH3PXD2B/MET/LIMA1/RHOF/CTGF/NEDD9/ALMS1/WNT11/LCP1/SORBS3/BAIAP2L2	57
BP	GO:1901342	regulation of vasculature development	122/4196	410/19623	3.61e-05	0.0015864	0.00124581	HYAL1/CEACAM1/RAPGEF3/TEK/GATA2/CTSH/PTK2B/ZC3H12A/NOS3/CX3CL1/SEMA4A/KLF2/TLR3/MMRN2/GPER1/AQP1/CD40/PPARG/TNFRSF12A/GPR4/STAT3/PDGFB/VASH2/HTATIP2/TNFSF12/CIB1/PTGS2/ENG/FGF1/FAM129B/CFLAR/TIE1/NFE2L2/DDAH1/SPRED1/SIRT1/E2F2/KLF4/TBXA2R/TGFBR2/RRAS/ITGB8/BRCA1/STAB1/NPR1/EPHA1/F3/ANXA3/RNH1/HMGA2/PPP1R16B/SP100/JUP/CHRNA7/ECSCR/CEMIP2/EPN1/CTNNB1/ENPP2/AGO2/SYNJ2BP/SERPINE1/EFNA1/EGR1/RHOB/ERBB…	122
BP	GO:0034724	DNA replication-independent nucleosome organization	26/4196	57/19623	3.76e-05	0.0016307	0.0012806	HJURP/RBBP4/CENPA/CENPI/KNL1/OIP5/CENPH/NPM1/CENPU/CENPP/ASF1B/MIS18BP1/CENPM/CENPK/CENPL/CENPO/H3F3A/NASP/SUPT16H/CENPQ/MIS18A/CENPW/SMARCA5/CENPN/HIST1H4C/ITGB3BP	26
BP	GO:0048762	mesenchymal cell differentiation	70/4196	210/19623	3.76e-05	0.0016307	0.0012806	PBLD/EDN1/SOX11/SEMA4A/S100A4/HDAC2/SIX2/KITLG/HPN/FAM83D/TGFB1/ENG/SEMA3G/FGF8/ERG/MAPK3/EZH2/VASN/TGFBR2/RBPJ/GLIPR2/BMPR1A/RTN4/HMGA2/SEMA3B/EDNRB/CTNNB1/TIAM1/EFNA1/NOLC1/LOXL3/HAS2/PDPN/HIF1A/ZNF703/FGFR1/STRAP/LRP6/SEMA4D/GBX2/ADAM15/LAMA5/BMP7/PHLDB1/RGCC/SDCBP/STAT1/OLFM1/MAD2L2/DAB2/SEMA3C/OSR1/HEY1/GDNF/TGFBR3/TMEM100/SEMA3A/LOXL2/EFNB1/FOXC2/SNAI1/LEF1/WNT11/HGF/ERBB4/GREM1/CRB2/DLG5/S…	70
BP	GO:0033628	regulation of cell adhesion mediated by integrin	21/4196	42/19623	3.85e-05	0.00164291	0.00129019	MUC1/PIEZO1/PLAU/CIB1/LYN/DPP4/LPXN/SERPINE1/EFNA1/SWAP70/ITGB1BP1/PTPN6/PODXL/CYP1B1/NEXMIF/CCL21/CCL5/FOXC2/ACER2/SNAI2/PIK3CG	21
BP	GO:0000075	cell cycle checkpoint	83/4196	259/19623	3.85e-05	0.00164291	0.00129019	MUC1/TOP2A/SOX11/EME1/NDRG1/BCL2L1/CDC25C/CDC6/BUB1B/BUB1/BRIP1/NDC80/DTL/TTK/CENPF/TRIP13/AURKB/CDK1/E2F7/FANCI/TGFB1/CDC45/MSH2/E2F1/ZWINT/SPDL1/BLM/CCNB1/GTSE1/NPM1/BABAM2/TOPBP1/ZWILCH/CNOT9/MAD2L1/CDK2/GADD45A/PLK1/AURKA/CENPJ/PRKDC/CDC5L/KNTC1/TICRR/BTG2/CDT1/DNA2/DUSP1/BRCA1/WDR76/TOP2B/DCLRE1B/TAOK3/HMGA2/H2AFX/CHEK1/E2F8/DONSON/PCBP4/TIMELESS/CHEK2/FBXO6/GEN1/CNOT6/INTS7/CLSPN/PCNA/RHNO1…	83
BP	GO:0016925	protein sumoylation	38/4196	96/19623	3.86e-05	0.00164291	0.00129019	TOP2A/TRPM4/EYA1/UBA2/BIRC5/SP3/AURKB/IFIH1/CDCA8/GNL3/NUP107/TOP1/RAE1/NUP58/TOLLIP/SAE1/TOP2B/EGR2/NUP160/MUL1/NUP205/MITF/SENP1/NUP155/KIAA1586/NDC1/NUP153/CTNNB1/EGR1/PCNA/NUP133/RNF212/RASD2/INCENP/TPR/POM121C/HMG20A/NUP210	38
BP	GO:0033173	calcineurin-NFAT signaling cascade	16/4196	28/19623	3.93e-05	0.00164841	0.00129451	RCAN1/CIB1/LMCD1/CHP1/RCAN2/ERBB3/AKAP6/NFATC4/NFAT5/ADGRB2/SLC9A1/NFATC1/NFATC2/PRNP/NFATC3/RCAN3	16
BP	GO:0051402	neuron apoptotic process	75/4196	229/19623	3.97e-05	0.00164841	0.00129451	PTK2B/SOD2/USP53/GATA3/PRKN/MDK/CPEB4/NR4A2/NONO/SIX1/BCL2L1/PPARGC1A/MYB/KIF14/MYBL2/GRM4/ADNP/PARP1/CLN3/MSH2/CLCF1/XRCC2/FGF8/NR4A3/CDK5R1/AIFM1/CTSZ/BTG2/SET/CCL2/BOK/APP/FYN/SIX4/KDM2B/UNC5B/CTNNB1/DRAXIN/NQO1/CEBPB/HSP90AB1/PINK1/TRIM2/NLRP1/ERBB3/UBE2V2/CITED1/CNTFR/HIF1A/STAR/MAP3K11/TFAP2A/TYRO3/WFS1/NGFR/NAE1/CASP3/TOX3/GABRA5/CASP2/GDNF/FIS1/EGLN3/TNFRSF21/POLB/FAM162A/DDIT3/FZD9/APAF1…	75
BP	GO:0009409	response to cold	23/4196	48/19623	3.98e-05	0.00164841	0.00129451	ACOT11/LPL/GMPR/PPARG/ACADVL/PPARGC1A/METRNL/HSPA2/ZNF516/NFKBIA/ATP2B1/FOS/THRA/COX2/HSPD1/CASP8/SLC25A27/RNF34/DNAJC3/SLC9A1/ADM/UCP2/CDH8	23
BP	GO:0030071	regulation of mitotic metaphase/anaphase transition	23/4196	48/19623	3.98e-05	0.00164841	0.00129451	CDC6/BUB1B/BUB1/NDC80/TTK/CENPF/CENPE/TRIP13/DLGAP5/CCNB1/UBE2C/RAD21/MAD2L1/PLK1/CDT1/DUSP1/ESPL1/GEN1/DYNC1LI1/MAD2L2/CDK5RAP2/TPR/NEK6	23
BP	GO:0032956	regulation of actin cytoskeleton organization	106/4196	348/19623	4.04e-05	0.00166029	0.00130384	SCIN/EDN1/RAPGEF3/TEK/EPS8L2/PLEKHH2/PTK2B/ACTR3C/STMN1/F2RL1/CCDC88A/ICAM1/KANK3/PRKN/WASF1/SDC4/CARMIL1/ARHGEF10L/RHOD/INPP5K/SSH3/ARHGAP18/CAPG/TGFB1/ARPC1B/TMSB15B/ARHGEF15/MYO1C/VASP/SPTBN2/ADD2/S1PR1/ARHGAP6/CDK5R1/S100A10/ABI2/TMSB15B/EPHA1/TMSB15A/PXN/DMTN/RHOBTB1/EPS8L1/F11R/FES/CTTN/VANGL2/EVL/SYNPO/DSTN/RHOB/JAM3/RHOC/CDC42EP2/WDR1/FSCN1/GSN/SWAP70/SLIT2/AVIL/CD2AP/ITGB1BP1/PPM1E/SHANK…	106
BP	GO:2001056	positive regulation of cysteine-type endopeptidase activity	59/4196	170/19623	4.06e-05	0.00166029	0.00130384	CTSH/CASP10/ROBO1/TRADD/TNFSF10/GPER1/PPARG/TBC1D10A/ARRB1/CYFIP2/LCK/CASP4/HMGB1/CFLAR/SIRT1/AIFM1/LGALS9/ANP32B/MUL1/BOK/F3/FYN/SENP1/NEK5/HSPD1/CASP8AP2/CASP8/CASP1/TFAP4/NLRP1/MAP3K5/CYR61/IFI27/IFI27L2/CASP7/GSN/PERP/TNFSF15/CASC2/CRADD/NGFR/CASP3/NOD1/CASP2/DAPK1/TNFRSF10B/FIS1/EGLN3/CYCS/CTGF/GRIN2B/FAM162A/PYCARD/GRIN2A/ACER2/NDUFA13/APAF1/MAPT/SNCA	59
BP	GO:0042770	signal transduction in response to DNA damage	52/4196	145/19623	4.22e-05	0.00171561	0.00134728	MUC1/NDRG1/CDC25C/DTL/BCL3/CDK1/E2F7/E2F1/CCNB1/GTSE1/NPM1/BABAM2/CNOT9/CDK2/SPRED1/SIRT1/GADD45A/PLK1/AURKA/CENPJ/PRKDC/CDC5L/BTG2/BRCA1/KDM1A/CD74/RPS6KA6/BRCA2/FOXM1/CHEK1/E2F8/SP100/PCBP4/CHEK2/CNOT6/TFAP4/PCNA/SPRED2/MYO6/RGCC/CRADD/MAD2L2/SOX4/UBC/CASP2/PAXIP1/TNKS1BP1/PLA2R1/SNAI1/CD44/TP73/SNAI2	52
BP	GO:0045765	regulation of angiogenesis	114/4196	380/19623	4.37e-05	0.00176454	0.0013857	HYAL1/CEACAM1/RAPGEF3/TEK/GATA2/CTSH/PTK2B/ZC3H12A/NOS3/CX3CL1/SEMA4A/KLF2/TLR3/MMRN2/AQP1/CD40/PPARG/TNFRSF12A/GPR4/STAT3/VASH2/HTATIP2/TNFSF12/CIB1/PTGS2/ENG/FGF1/FAM129B/TIE1/NFE2L2/DDAH1/SPRED1/SIRT1/E2F2/KLF4/TBXA2R/TGFBR2/RRAS/ITGB8/BRCA1/STAB1/NPR1/EPHA1/F3/ANXA3/RNH1/HMGA2/PPP1R16B/SP100/JUP/CHRNA7/ECSCR/CEMIP2/EPN1/CTNNB1/ENPP2/AGO2/SYNJ2BP/SERPINE1/EFNA1/RHOB/ERBB2/STARD13/SASH1/CARD10/…	114
BP	GO:0036293	response to decreased oxygen levels	118/4196	396/19623	4.49e-05	0.00180039	0.00141386	EDN1/TEK/AQP3/PTK2B/CPEB2/PLAU/ITGA2/ATP1B1/ICAM1/PSMB10/CPEB4/NR4A2/NDRG1/EPAS1/AQP1/BRIP1/ALAD/PPARGC1A/CRYAB/MYB/HSD11B2/SOD3/CCNA2/TGFB1/PPARA/E2F1/SUV39H2/PTGS2/CCNB1/ND4/DNMT3A/CFLAR/PSMB9/NFE2L2/DDAH1/SIRT1/VASN/CYTB/TGFBR2/AIFM1/RBPJ/ND5/ENDOG/CAT/PSMB8/ACAA2/DPP4/CHRNA7/CASP1/TMBIM6/HMOX2/AGTRAP/PINK1/EGR1/HIF1A/THBS1/RAMP2/CUL2/TLR2/CXCR4/ACVRL1/KCNK2/STC2/CD34/BMP7/STOX1/PSME4/CREBBP/P…	118
BP	GO:0097720	calcineurin-mediated signaling	17/4196	31/19623	4.62e-05	0.00184371	0.00144788	RCAN1/CIB1/LMCD1/CHP1/RCAN2/ERBB3/AKAP6/NFATC4/NFAT5/ADGRB2/SLC9A1/NFATC1/NFATC2/NR5A2/PRNP/NFATC3/RCAN3	17
BP	GO:0030330	DNA damage response, signal transduction by p53 class mediator	45/4196	121/19623	4.94e-05	0.00195658	0.00153652	MUC1/NDRG1/CDC25C/BCL3/CDK1/E2F7/E2F1/CCNB1/GTSE1/NPM1/CNOT9/CDK2/SPRED1/SIRT1/GADD45A/AURKA/CENPJ/BTG2/BRCA1/KDM1A/CD74/RPS6KA6/BRCA2/FOXM1/E2F8/SP100/PCBP4/CHEK2/CNOT6/TFAP4/PCNA/SPRED2/MYO6/RGCC/CRADD/SOX4/UBC/CASP2/PAXIP1/TNKS1BP1/PLA2R1/SNAI1/CD44/TP73/SNAI2	45
BP	GO:0070997	neuron death	104/4196	342/19623	5.11e-05	0.00201323	0.001581	PTK2B/SOD2/LRRK2/USP53/GATA3/PRKN/MDK/CPEB4/NR4A2/NONO/SIX1/BCL2L1/PPARGC1A/STAT3/MYB/KIF14/NCOA7/MYBL2/GRM4/ADNP/PARP1/CLN3/PPARA/MSH2/CLCF1/XRCC2/FGF8/NR4A3/SIRT1/CDK5R1/AIFM1/CTSZ/BTG2/SET/CCL2/ENDOG/TP53BP2/BOK/FOS/APP/RAB29/FYN/SIX4/KDM2B/CHP1/CHRNA7/UNC5B/CASP8/CTNNB1/DRAXIN/NQO1/CEBPB/HSP90AB1/PINK1/PICALM/TRIM2/EGR1/CLU/SLC25A27/NLRP1/MAP3K5/ERBB3/UBE2V2/CITED1/CNTFR/HIF1A/STAR/CD34/MAP3K…	104
BP	GO:0050769	positive regulation of neurogenesis	133/4196	457/19623	5.22e-05	0.00204189	0.00160351	CPEB3/GATA2/PTK2B/CX3CL1/SOX11/ROBO1/RASAL1/PRKCH/PRKN/HDAC2/GPER1/ETV5/PPARG/CYB5D2/TNFRSF12A/L1CAM/MYB/TGIF2/GPRC5B/ASPM/SHANK2/ADNP/FZD3/BCL6/CLCF1/TCF12/XRCC2/TSPO/CRABP2/KIF20B/CFLAR/TCF3/NFE2L2/EZH2/PPP2R5B/CSF1/PCP4/LYN/COBL/LIF/SCARF1/ECT2/KDM1A/MUL1/ADRA2C/RTN4/APP/MAPK6/FYN/PTK7/IRX3/FES/CDON/ENC1/SPINT1/CTNNB1/ROBO2/SYT17/CAPRIN1/TIAM1/ITSN2/CSNK1E/MAP1B/TENM4/ITGA3/TUBB2B/LRP2/UBE2V2/…	133
BP	GO:0031023	microtubule organizing center organization	50/4196	139/19623	5.36e-05	0.0020802	0.00163359	SLC16A1/PARD6A/KIF11/SGO1/NEK2/PCLAF/PLK4/CDK1/XPO1/XRCC2/NPM1/RANBP1/CDK2/GADD45A/PLK1/AURKA/CENPJ/CKAP5/PKD2/BRCA1/CHMP2A/POC1A/HAUS6/STIL/BRCA2/SASS6/WDR62/CHEK1/KIF3B/NDC1/FES/GEN1/CTNNB1/CCNF/SPICE1/CNTLN/KAT2B/TUBGCP3/CEP72/HAUS1/HAUS8/CEP76/CDK5RAP2/HAUS3/CEP85/JHY/HAUS5/BRSK1/CCDC78/CEP131	50
BP	GO:1905818	regulation of chromosome separation	26/4196	58/19623	5.43e-05	0.0020802	0.00163359	CDC6/BUB1B/BUB1/NDC80/TTK/CENPF/CENPE/TRIP13/DLGAP5/PTTG1/TACC3/CCNB1/UBE2C/RAD21/MAD2L1/PLK1/CDT1/DUSP1/ESPL1/GEN1/DYNC1LI1/MAD2L2/CDK5RAP2/ANAPC1/TPR/NEK6	26
BP	GO:0010212	response to ionizing radiation	55/4196	157/19623	5.44e-05	0.0020802	0.00163359	ICAM1/GATA3/EYA1/BCL2L1/ALAD/CRYAB/RAD51/PARP1/TGFB1/MSH2/XRCC2/DNM2/BLM/BABAM2/DNMT3A/TOPBP1/RAD51AP1/SIRT1/GADD45A/PRKDC/TICRR/FANCD2/BRCA1/ECT2/KDM1A/RAD54L/BRCA2/HMGA2/H2AFX/NUCKS1/CHEK2/RRM1/INTS7/EGR1/RHOB/COP1/RHNO1/WRN/USP28/STAR/CCND2/THBD/VCAM1/ANXA1/FIGNL1/CASP3/NABP1/DNMT3B/CYBA/PAXIP1/TNKS1BP1/POLB/AEN/TP73/SNAI2	55
BP	GO:0097305	response to alcohol	67/4196	201/19623	5.45e-05	0.0020802	0.00163359	PTK2B/KLF2/MAOB/ICAM1/GATA3/HDAC2/BCL2L1/PPARG/TYMS/ALAD/OXCT1/STAT3/RAD51/CDK1/TGFB1/BLM/RECQL5/ND4/CLDN7/DNMT3A/KLF4/CYTB/TBXA2R/PRKAA2/TGFBR2/ADCYAP1R1/BRCA1/CDO1/CAT/PTGER2/SDF4/FYN/JUP/CDH1/CASP8/CTNNB1/GSTP1/NQO1/FECH/CLDN1/LRP6/GSN/STAR/PMVK/SETDB1/OSBPL7/GOT2/VCAM1/SPI1/GGH/HPGD/TP53INP1/RPL10A/CCL21/TGFBR3/RPS4X/POLB/GRIN2B/CLDN3/GPLD1/ABAT/GRIN2A/LRP8/G6PD/CD14/CNR1/KCNMB1	67
BP	GO:0031100	animal organ regeneration	34/4196	84/19623	5.69e-05	0.00214648	0.00168565	PPARG/TYMS/CDK1/CCNA2/TGFB1/NFKBIA/NR4A3/EZH2/AURKA/CYTB/TGFBR2/GAS6/PRPS2/HFE/ANXA3/ATIC/PTPN3/NNMT/GSTP1/CEBPB/PCNA/CLDN1/GLI3/PPAT/CDK4/CAD/ADM/TGFBR3/PTPRU/PGF/HGF/EGFR/LCP1/UCP2	34
BP	GO:0070542	response to fatty acid	34/4196	84/19623	5.69e-05	0.00214648	0.00168565	ACSL1/EDN1/ZC3H12A/PPARG/FABP3/HMGCL/ALAD/PPARGC1A/CPT1A/E2F1/PTGS2/CCNB1/PRKAA2/CAT/PTGER2/GLDC/PDK4/AKR1C2/FFAR1/CLDN1/SMARCD1/TLR2/NFATC4/CDK4/AKR1C3/PTAFR/NME1/CCL21/TGFBR3/CTGF/SREBF1/DGAT2/OR51E2/UCP2	34
BP	GO:0007219	Notch signaling pathway	65/4196	194/19623	5.86e-05	0.00218408	0.00171517	GATA2/ELF3/MDK/HNF1B/LLGL2/ARRB1/WWC1/STAT3/DLGAP5/ANXA4/BCL6/TGFB1/ARRDC1/GOT1/NFKBIA/FAM129B/TBX2/MIB1/TGFBR2/RBPJ/NOTCH4/DLL3/APP/ZNF423/EGFL7/PBX1/EPN1/SYNJ2BP/KAT2B/TCIM/JAG2/CD46/KRT19/MAML1/WWP2/NOTCH2/ITGB1BP1/BMP7/CNTN1/CREBBP/PERP/IL6ST/MAML3/STAT1/UBC/GALNT11/AAK1/HEY1/HHEX/CHAC1/SUSD5/LLGL1/TMEM100/FOXC2/DLK1/GMDS/SNAI1/KCNA5/CNTN6/ENHO/EGFR/DLL4/NOV/POSTN/SNAI2	65
BP	GO:0033046	negative regulation of sister chromatid segregation	20/4196	40/19623	5.87e-05	0.00218408	0.00171517	BUB1B/BUB1/NDC80/TTK/CENPF/TRIP13/PTTG1/CCNB1/RAD21/MAD2L1/PLK1/CDT1/DUSP1/ESPL1/GEN1/TNKS/DYNC1LI1/MAD2L2/CDK5RAP2/TPR	20
BP	GO:0072080	nephron tubule development	39/4196	101/19623	5.91e-05	0.00218408	0.00171517	WNK4/ACAT1/GATA3/HNF1B/SIX1/EYA1/SIX2/TGFB1/FGF1/FGF8/PKD2/LIF/NPNT/ADAMTS16/SIX4/IRX3/PBX1/CTNNB1/CITED1/GLI3/KIF26B/LAMA5/LGR4/STAT1/POU3F3/PROM1/OSR1/CD24/WT1/GDNF/SALL1/HOXA11/VEGFA/PGF/HOXB7/DCHS1/WNT11/GREM1/FOXD1	39
BP	GO:0060675	ureteric bud morphogenesis	30/4196	71/19623	5.92e-05	0.00218408	0.00171517	GATA3/HNF1B/SIX1/EYA1/SIX2/TGFB1/FGF1/FGF8/PKD2/NPNT/ADAMTS16/SIX4/PBX1/CTNNB1/CITED1/GLI3/KIF26B/LAMA5/LGR4/WT1/GDNF/SALL1/HOXA11/VEGFA/PGF/HOXB7/DCHS1/WNT11/GREM1/FOXD1	30
BP	GO:1902099	regulation of metaphase/anaphase transition of cell cycle	23/4196	49/19623	5.99e-05	0.00219585	0.00172442	CDC6/BUB1B/BUB1/NDC80/TTK/CENPF/CENPE/TRIP13/DLGAP5/CCNB1/UBE2C/RAD21/MAD2L1/PLK1/CDT1/DUSP1/ESPL1/GEN1/DYNC1LI1/MAD2L2/CDK5RAP2/TPR/NEK6	23
BP	GO:0007098	centrosome cycle	47/4196	129/19623	6.16e-05	0.00224627	0.00176401	SLC16A1/PARD6A/KIF11/SGO1/NEK2/PCLAF/PLK4/CDK1/XPO1/XRCC2/NPM1/RANBP1/CDK2/GADD45A/PLK1/AURKA/CENPJ/CKAP5/PKD2/BRCA1/CHMP2A/POC1A/HAUS6/STIL/BRCA2/SASS6/WDR62/CHEK1/KIF3B/FES/GEN1/CTNNB1/CCNF/SPICE1/CNTLN/KAT2B/TUBGCP3/CEP72/HAUS1/HAUS8/CEP76/CDK5RAP2/HAUS3/CEP85/HAUS5/BRSK1/CEP131	47
BP	GO:0019751	polyol metabolic process	45/4196	122/19623	6.22e-05	0.0022469	0.00176451	DEGS2/INPP5J/PTK2B/SPR/IMPA2/GPER1/ITPK1/SLC5A3/INPP5K/SGPP1/GOT1/PTH1R/PLCD1/GK5/ADCYAP1R1/SYNJ1/TKFC/AKR1B1/INPP1/GALK1/PCBD2/PLCG2/DHFR/GK/PLCG1/INPP5D/MTMR7/SPTLC2/GBA/NUDT4/PCBD1/PTAFR/HRH1/PLCB4/INPP4A/CALM1/NUDT11/PTS/DGAT2/PLCD3/ACER2/SGPP2/P2RY1/ITPKB/SNCA	45
BP	GO:0072078	nephron tubule morphogenesis	33/4196	81/19623	6.23e-05	0.0022469	0.00176451	WNK4/GATA3/HNF1B/SIX1/EYA1/SIX2/TGFB1/FGF1/FGF8/PKD2/NPNT/ADAMTS16/SIX4/IRX3/PBX1/CTNNB1/CITED1/GLI3/KIF26B/LAMA5/LGR4/OSR1/WT1/GDNF/SALL1/HOXA11/VEGFA/PGF/HOXB7/DCHS1/WNT11/GREM1/FOXD1	33
BP	GO:0007265	Ras protein signal transduction	143/4196	499/19623	6.32e-05	0.00226426	0.00177813	AGFG2/RAPGEF3/EPS8L2/RASGRP1/RAB25/ADAP1/FGD3/STMN1/ROBO1/RASAL1/F2RL1/CNKSR1/WASF1/ARHGEF16/KITLG/PSD4/ARRB1/GPR4/ARHGAP29/KIF14/ARHGEF10L/RHOD/TNK1/SQSTM1/CCNA2/BCL6/FGD4/DNM2/CNKSR2/ADGRG1/RAB4B/ARHGEF15/CDK2/P2RY8/CSF1/ARHGEF37/RAB9A/TAX1BP3/ARHGAP6/TNFAIP1/CAVIN4/DNMT1/ABI2/RRAS/IQGAP3/KPNB1/RASGRF2/RAB9B/ARHGEF39/ECT2/RAB29/RAP2A/FOXM1/RHOBTB1/EPS8L1/VAV3/RASGRP3/SPATA13/ARFGEF3/VANGL2/ARAP…	143
BP	GO:0009123	nucleoside monophosphate metabolic process	116/4196	391/19623	6.36e-05	0.00226695	0.00178025	OGDHL/ATP6V1B1/ATP1B1/CHCHD10/UPP1/TCIRG1/PFKFB3/PRKAG2/ATP5S/TYMS/SDHA/PPARGC1A/STAT3/ESRRB/SHMT1/CDK1/ATP6V1A/PARP1/TGFB1/PPARA/MSH2/GMPS/TSPO/CCNB1/ND4/ND4L/ATP8/COQ9/NUP107/BPGM/MPP1/ATP6/CYTB/PRKAA2/ND5/RAE1/NUP58/NUP160/PRPS2/COX1/NDUFV1/COX3/NUP205/TK2/COX2/ND6/ND3/ND1/NUP155/ATIC/GALK1/NDUFS7/NDC1/ATP5F1D/VPS9D1/NUP153/OGDH/ND2/PINK1/FAM20C/TJP2/OLA1/NUP133/BEND3/UCK2/HIF1A/GMPR2/PPAT/SDH…	116
BP	GO:0001701	in utero embryonic development	103/4196	340/19623	6.54e-05	0.0023177	0.00182011	EDN1/GATA2/ELF3/TFEB/NOS3/KLF2/GATA3/IGF2/PHLDA2/HNF1B/APBA2/EPAS1/BCL2L1/SOX17/JUNB/MAFF/SP3/CCNB2/PDGFB/NEK2/INPP5K/PLK4/VASH2/E2F7/SOCS3/MSH2/ACVR1B/XRCC2/CCNB1/ND4/TIE1/ST14/TET1/MIB1/GINS1/TGFBR2/RBPJ/PLCD1/PKD2/BMPR1A/ENDOG/LIF/CHD7/STIL/DUSP3/BRCA2/SBDS/SOX18/HS6ST1/E2F8/NCAPG2/SLC30A1/GINS4/NASP/CASP8/EPN1/SPINT1/CTNNB1/CEBPB/HEG1/NR2F2/BYSL/CYR61/BTF3/FLVCR1/JAG2/SOX6/CITED1/KRT19/HIF1A/…	103
BP	GO:0071772	response to BMP	61/4196	180/19623	6.72e-05	0.00235684	0.00185084	GDF15/SOX11/FSTL3/COL2A1/GATA3/TOB1/FBXL15/GDF1/TGFB1/SMAD5/ENG/FGF8/MAPK3/CHRD/RBPJ/BMPR1A/ZCCHC12/SOSTDC1/CTDSPL2/BMPR1B/HFE/ZNF423/ROR2/RGMA/ACVR2B/AMHR2/SPINT1/ZCCHC18/EGR1/SMAD9/CYR61/ITGA3/LRP2/BMP6/ACVRL1/BMP7/NEO1/GDF10/LRP4/ADAMTS7/CHRDL1/FKBP8/BMPER/ID1/SPINT2/RNF165/TGFBR3/GDF7/TMEM100/UBE2O/LEF1/ZNF8/GATA4/GREM1/RGMB/RBPMS2/CRB2/AMH/SCX/FOXD1/BMP8B	61
BP	GO:0071773	cellular response to BMP stimulus	61/4196	180/19623	6.72e-05	0.00235684	0.00185084	GDF15/SOX11/FSTL3/COL2A1/GATA3/TOB1/FBXL15/GDF1/TGFB1/SMAD5/ENG/FGF8/MAPK3/CHRD/RBPJ/BMPR1A/ZCCHC12/SOSTDC1/CTDSPL2/BMPR1B/HFE/ZNF423/ROR2/RGMA/ACVR2B/AMHR2/SPINT1/ZCCHC18/EGR1/SMAD9/CYR61/ITGA3/LRP2/BMP6/ACVRL1/BMP7/NEO1/GDF10/LRP4/ADAMTS7/CHRDL1/FKBP8/BMPER/ID1/SPINT2/RNF165/TGFBR3/GDF7/TMEM100/UBE2O/LEF1/ZNF8/GATA4/GREM1/RGMB/RBPMS2/CRB2/AMH/SCX/FOXD1/BMP8B	61
BP	GO:0001101	response to acid chemical	107/4196	356/19623	6.79e-05	0.00236682	0.00185868	ACSL1/EDN1/CPEB3/CTSH/AQP3/PTK2B/ZC3H12A/ITGA2/KLF2/FZD7/ICAM1/HDAC2/CPEB4/AKR1C1/SIX1/BCL2L1/AQP1/PPARG/FABP3/HMGCL/TYMS/ALAD/PPARGC1A/MYB/PDGFB/SHMT1/IPO5/IGFBP7/SLC10A3/CPT1A/E2F1/PTGS2/CCNB1/DNMT3A/TIE1/KLF4/PRKAA2/CD9/LYN/AIFM1/DNMT1/SOCS1/PKD2/DUSP1/CDO1/PTGES/SIPA1/CAT/PTGER2/GLDC/FYN/AKR1B1/PTK7/PDK4/TMBIM6/GSTP1/NQO1/COL18A1/CASTOR1/CEBPB/AKR1C2/FFAR1/PINK1/DHFR/EGR1/PCNA/CLDN1/BMP6/SMAR…	107
BP	GO:0006302	double-strand break repair	77/4196	240/19623	6.89e-05	0.00238721	0.0018747	EME1/EYA1/DEK/BRIP1/PARP3/RAD51/TRIP13/MND1/POLQ/ESCO2/PARP1/CDCA5/CIB1/CDC45/MSH2/SLF1/XRCC2/BLM/RECQL5/RAD21/BABAM2/BARD1/RAD51AP1/PRKDC/CDC7/MMS22L/DNA2/PARPBP/CYREN/BRCA1/KDM1A/RAD54L/NSD2/DCLRE1B/BRCA2/HMGA2/H2AFX/PPP4R2/FOXM1/CHEK1/NUCKS1/GINS2/TIMELESS/CHEK2/AUNIP/GINS4/RNF138/GEN1/RIF1/RECQL4/SWSAP1/TEX15/SLF2/DDX1/SMARCAD1/TONSL/C14orf39/UBE2V2/SMC6/WRN/POLA1/MCM8/FEN1/DDX11/LIG3/MAD2L2/…	77
BP	GO:0001666	response to hypoxia	115/4196	388/19623	7.13e-05	0.00245891	0.001931	EDN1/TEK/AQP3/PTK2B/CPEB2/PLAU/ITGA2/ATP1B1/ICAM1/PSMB10/NR4A2/NDRG1/EPAS1/AQP1/BRIP1/ALAD/PPARGC1A/CRYAB/MYB/HSD11B2/SOD3/CCNA2/TGFB1/PPARA/E2F1/SUV39H2/PTGS2/CCNB1/ND4/DNMT3A/CFLAR/PSMB9/NFE2L2/DDAH1/SIRT1/VASN/CYTB/TGFBR2/RBPJ/ND5/ENDOG/CAT/PSMB8/ACAA2/DPP4/CHRNA7/CASP1/TMBIM6/HMOX2/AGTRAP/PINK1/EGR1/HIF1A/THBS1/RAMP2/CUL2/TLR2/CXCR4/ACVRL1/KCNK2/STC2/CD34/BMP7/STOX1/PSME4/CREBBP/PAK1/RGCC/PSM…	115
BP	GO:0006027	glycosaminoglycan catabolic process	27/4196	62/19623	7.3e-05	0.00249692	0.00196085	HYAL1/FUCA1/SDC4/HEXA/GPC2/HMMR/TGFB1/NAGLU/HYAL2/CHP1/PRELP/SDC1/CEMIP2/LYG1/GNS/GALNS/GPC4/GLB1/AGRN/IDUA/SGSH/SLC9A1/BGN/LYVE1/CD44/GPC6/CSPG4	27
BP	GO:0010950	positive regulation of endopeptidase activity	66/4196	199/19623	7.32e-05	0.00249692	0.00196085	CTSH/CASP10/ROBO1/TRADD/TNFSF10/GPER1/PPARG/TBC1D10A/ARRB1/STAT3/CYFIP2/LCK/CASP4/HMGB1/CFLAR/SIRT1/LYN/AIFM1/LGALS9/ANP32B/MUL1/BOK/F3/MBP/FYN/SENP1/NEK5/HSPD1/CASP8AP2/CASP8/CASP1/PICALM/TFAP4/EFNA1/NLRP1/MAP3K5/CYR61/IFI27/IFI27L2/CASP7/GSN/PERP/TNFSF15/PSME1/CASC2/CRADD/EFNA3/NGFR/CASP3/NOD1/CASP2/DAPK1/TNFRSF10B/FIS1/EGLN3/CYCS/CTGF/GRIN2B/FAM162A/PYCARD/GRIN2A/ACER2/NDUFA13/APAF1/MAPT/SNCA	66
BP	GO:0090132	epithelium migration	103/4196	341/19623	7.43e-05	0.00252026	0.00197918	HYAL1/PBLD/CEACAM1/EDN1/TEK/CTSH/PTK2B/RAB25/ZC3H12A/NOS3/ITGA2/SEMA4A/ROBO1/GATA3/MMRN2/NR4A1/CD40/PPARG/HBEGF/PDGFB/MARVELD3/HMGB1/TNFSF12/TGFB1/CIB1/PTGS2/ANLN/FGF1/FGF8/NFE2L2/SPRED1/STAT5A/SIRT1/KLF4/TBXA2R/TGFBR2/GLIPR2/RTN4/ANXA3/SOX18/GIPC1/PXN/PRKX/PRCP/EPB41L4B/SP100/DPP4/JUP/MAP2K3/ENPP2/EVL/SYNJ2BP/EFNA1/RHOB/NR2F2/STARD13/SASH1/ITGA3/CARD10/HAS2/HIF1A/BCAR1/THBS1/FGFR1/FLT4/STRAP/PLC…	103
BP	GO:0009199	ribonucleoside triphosphate metabolic process	105/4196	349/19623	7.56e-05	0.00255297	0.00200487	OGDHL/ATP6V1B1/LRRK2/ATP1B1/CHCHD10/TCIRG1/PFKFB3/PRKAG2/ATP5S/GIMAP7/NFS1/SDHA/PPARGC1A/STAT3/ESRRB/MOCS2/CDK1/ATP6V1A/PARP1/TGFB1/PPARA/MSH2/TSPO/CCNB1/ND4/ND4L/ATP8/COQ9/NUP107/BPGM/ATP6/CYTB/PRKAA2/ND5/RAE1/NUP58/NUP160/COX1/NDUFV1/COX3/NUP205/CTPS2/COX2/ND6/MOCS1/ND3/ND1/NUP155/GALK1/NDUFS7/NDC1/ATP5F1D/VPS9D1/NUP153/OGDH/ND2/RAN/PINK1/NME3/FAM20C/NME5/OLA1/NUP133/BEND3/UCK2/HIF1A/SDHD/SURF1…	105
BP	GO:0062013	positive regulation of small molecule metabolic process	60/4196	177/19623	7.61e-05	0.00255495	0.00200642	RAPGEF3/NOS3/IGF2/PFKFB3/GPER1/PPARG/COMT/PPARGC1A/STAT3/ESRRB/PDGFB/CDK1/ADNP/CPT1A/PPARA/PTGS2/CCNB1/FGF1/NR4A3/MLYCD/NR1H2/PTH1R/PRKAA2/NR1D1/FZD2/ADCYAP1R1/NPR1/SLC45A3/DYRK2/ELOVL5/ABCG1/MID1IP1/LDLRAP1/PINK1/GPR161/KAT2B/BEND3/BMP6/HAS2/HIF1A/RAMP2/GPHA2/STAR/NFKB1/RAMP1/ENTPD5/ANXA1/GCK/PFKFB2/PTAFR/HRH1/ADM/CALM1/ENO1/SREBF1/DGAT2/GPLD1/P2RY1/SNCA/PPARGC1B	60
BP	GO:0090183	regulation of kidney development	26/4196	59/19623	7.75e-05	0.00258858	0.00203283	GATA3/HNF1B/SIX1/SIX2/PDGFB/TGFB1/CFLAR/LIF/PRKX/SIX4/CTNNB1/EGR1/CITED1/BMP7/LGR4/STAT1/PROM1/OSR1/CD24/WT1/PDGFA/GDNF/VEGFA/HOXB7/GREM1/FOXD1	26
BP	GO:0045841	negative regulation of mitotic metaphase/anaphase transition	17/4196	32/19623	7.9e-05	0.0026187	0.00205649	BUB1B/BUB1/NDC80/TTK/CENPF/TRIP13/CCNB1/RAD21/MAD2L1/PLK1/CDT1/DUSP1/GEN1/DYNC1LI1/MAD2L2/CDK5RAP2/TPR	17
BP	GO:0010639	negative regulation of organelle organization	112/4196	377/19623	7.92e-05	0.0026187	0.00205649	SCIN/TOP2A/PLEKHH2/INPP5J/LRRK2/STMN1/EML2/KANK3/PRKN/CKAP2/BCL2L1/BUB1B/HNRNPA1/BUB1/NDC80/ATAD2/PPARGC1A/TTK/CENPF/TRIP13/CARMIL1/NEK2/PIF1/HDGFL3/INPP5K/OMA1/MTBP/PTTG1/CAPG/PARP1/CIB1/MSH2/TSPO/DNM2/CCNB1/TMSB15B/NPM1/FBXO5/RAD21/TBC1D4/FBXO43/MAD2L1/TET1/SPTBN2/SIRT1/PLK1/ADD2/S1PR1/TOM1L2/ARHGAP6/MTM1/DNMT1/SET/TMSB15B/CDT1/LIF/DUSP1/BRCA1/CHMP2A/MUL1/BOK/TOM1L1/TMSB15A/ESPL1/DMTN/CAMSAP1/C…	112
BP	GO:0051384	response to glucocorticoid	55/4196	159/19623	8.05e-05	0.00264678	0.00207853	EDN1/MAOB/ICAM1/MDK/AQP1/TYMS/ALAD/KLF9/PAPPA/HSD11B2/FOSB/IGFBP7/TGFB1/PTGS2/GOT1/ZFP36/CFLAR/DUSP1/CDO1/ATP2B1/FOS/ANXA3/CBX3/ND3/SDC1/ERRFI1/GSTP1/TFAP4/FECH/PCNA/PDCD7/GLB1/CLDN1/ZFP36L2/BMP6/SLIT2/STAR/SSTR2/STC1/ANXA1/GBA/CTSV/CASP3/PTAFR/HEY1/DNMT3B/ABCA3/CAD/ADM/PAM/PTPRU/NR3C1/EGFR/PPARGC1B/DDIT4	55
BP	GO:0006336	DNA replication-independent nucleosome assembly	25/4196	56/19623	8.17e-05	0.00267283	0.00209899	HJURP/RBBP4/CENPA/CENPI/KNL1/OIP5/CENPH/NPM1/CENPU/CENPP/ASF1B/MIS18BP1/CENPM/CENPK/CENPL/CENPO/H3F3A/NASP/CENPQ/MIS18A/CENPW/SMARCA5/CENPN/HIST1H4C/ITGB3BP	25
BP	GO:0010631	epithelial cell migration	102/4196	338/19623	8.35e-05	0.00271715	0.0021338	HYAL1/PBLD/CEACAM1/EDN1/TEK/CTSH/PTK2B/RAB25/ZC3H12A/NOS3/ITGA2/SEMA4A/ROBO1/GATA3/MMRN2/NR4A1/CD40/PPARG/HBEGF/PDGFB/MARVELD3/HMGB1/TNFSF12/TGFB1/CIB1/PTGS2/ANLN/FGF1/NFE2L2/SPRED1/STAT5A/SIRT1/KLF4/TBXA2R/TGFBR2/GLIPR2/RTN4/ANXA3/SOX18/GIPC1/PXN/PRKX/PRCP/EPB41L4B/SP100/DPP4/JUP/MAP2K3/ENPP2/EVL/SYNJ2BP/EFNA1/RHOB/NR2F2/STARD13/SASH1/ITGA3/CARD10/HAS2/HIF1A/BCAR1/THBS1/FGFR1/FLT4/STRAP/PLCG1/SL…	102
BP	GO:0001656	metanephros development	38/4196	99/19623	8.48e-05	0.00274714	0.00215735	CTSH/ACAT1/GATA3/HNF1B/SIX1/EYA1/SIX2/PDGFB/FGF8/PKD2/LIF/FOXJ1/SIX4/IRX3/GDF11/CTNNB1/ROBO2/EGR1/CITED1/GLI3/KIF26B/CD34/BMP7/LGR4/STAT1/POU3F3/ITGA8/OSR1/WT1/PDGFA/LAMB2/GDNF/SALL1/FOXC2/HOXA11/GREM1/DLG5/FOXD1	38
BP	GO:2000816	negative regulation of mitotic sister chromatid separation	18/4196	35/19623	8.55e-05	0.00275323	0.00216213	BUB1B/BUB1/NDC80/TTK/CENPF/TRIP13/PTTG1/CCNB1/RAD21/MAD2L1/PLK1/CDT1/DUSP1/GEN1/DYNC1LI1/MAD2L2/CDK5RAP2/TPR	18
BP	GO:0034440	lipid oxidation	40/4196	106/19623	8.71e-05	0.00279233	0.00219284	ACADS/ACAT1/ACAA1/ETFDH/PRKAG2/PPARG/FABP3/ACADVL/PPARGC1A/HADHB/CYP4V2/CPT1A/PPARA/AUH/AMACR/NR4A3/MLYCD/PECR/DECR1/ETFBKMT/ACAA2/ETFB/PHYH/PDK4/ECH1/SCP2/SLC27A2/PEX7/ACACB/CRAT/CROT/ECI1/BDH2/PPARD/ECHDC2/DGAT2/PLA2G7/PPARGC1B/CNR1/CPT1C	40
BP	GO:0033048	negative regulation of mitotic sister chromatid segregation	19/4196	38/19623	8.96e-05	0.00284993	0.00223807	BUB1B/BUB1/NDC80/TTK/CENPF/TRIP13/PTTG1/CCNB1/RAD21/MAD2L1/PLK1/CDT1/DUSP1/GEN1/TNKS/DYNC1LI1/MAD2L2/CDK5RAP2/TPR	19
BP	GO:0000079	regulation of cyclin-dependent protein serine/threonine kinase activity	35/4196	89/19623	8.98e-05	0.00284993	0.00223807	CNPPD1/CDC25C/CDC6/PDGFB/SERTAD1/IPO5/PSRC1/BLM/CCNB1/PKMYT1/GADD45A/PLK1/CDK5R1/CCNE2/PKD2/CDC25A/CDKN3/CKS2/TFAP4/NR2F2/KAT2B/CDK4/CKS1B/CCND2/HEXIM2/CCNG1/RGCC/INCA1/CASP3/HHEX/CDKN2A/MAPRE3/TNFAIP3/DIRAS3/EGFR	35
BP	GO:0043523	regulation of neuron apoptotic process	67/4196	204/19623	9.06e-05	0.00285956	0.00224563	PTK2B/SOD2/GATA3/PRKN/MDK/CPEB4/NR4A2/NONO/SIX1/BCL2L1/PPARGC1A/MYB/KIF14/MYBL2/GRM4/ADNP/PARP1/CLN3/MSH2/CLCF1/XRCC2/FGF8/NR4A3/CDK5R1/AIFM1/CTSZ/BTG2/SET/CCL2/BOK/FYN/SIX4/KDM2B/UNC5B/CTNNB1/DRAXIN/NQO1/CEBPB/HSP90AB1/PINK1/TRIM2/ERBB3/UBE2V2/CITED1/CNTFR/HIF1A/STAR/MAP3K11/TFAP2A/TYRO3/WFS1/NAE1/CASP3/TOX3/GABRA5/CASP2/GDNF/FIS1/EGLN3/DDIT3/FZD9/PAK3/TP73/PRNP/FAIM2/G6PD/SNCA	67
BP	GO:0051985	negative regulation of chromosome segregation	20/4196	41/19623	9.17e-05	0.00288013	0.00226178	BUB1B/BUB1/NDC80/TTK/CENPF/TRIP13/PTTG1/CCNB1/RAD21/MAD2L1/PLK1/CDT1/DUSP1/ESPL1/GEN1/TNKS/DYNC1LI1/MAD2L2/CDK5RAP2/TPR	20
BP	GO:0007093	mitotic cell cycle checkpoint	64/4196	193/19623	9.38e-05	0.00293258	0.00230297	MUC1/TOP2A/EME1/BCL2L1/CDC25C/BUB1B/BUB1/NDC80/TTK/CENPF/TRIP13/AURKB/CDK1/E2F7/FANCI/TGFB1/MSH2/E2F1/ZWINT/BLM/CCNB1/GTSE1/NPM1/TOPBP1/ZWILCH/CNOT9/MAD2L1/CDK2/GADD45A/PLK1/AURKA/CENPJ/PRKDC/KNTC1/TICRR/BTG2/CDT1/DUSP1/BRCA1/TOP2B/TAOK3/HMGA2/E2F8/DONSON/PCBP4/CHEK2/GEN1/CNOT6/CLSPN/PCNA/RGCC/DYNC1LI1/CRADD/MAD2L2/CDK5RAP2/SOX4/UBC/NAE1/NABP1/CASP2/TNKS1BP1/TPR/TP73/BRSK1	64
BP	GO:0072524	pyridine-containing compound metabolic process	61/4196	182/19623	9.62e-05	0.00299273	0.00235022	OGDHL/RBKS/PDXK/PFKFB3/PRKAG2/NMRK1/MPC1/PPARGC1A/STAT3/ESRRB/PDHA1/PPARA/PTGS2/NUP107/BPGM/PNP/PRKAA2/NAPRT/PARP10/RAE1/NUP58/NUP160/PNPO/IDH2/NUP205/NUP155/GALK1/PSAT1/MPC2/NDC1/NUP153/NNMT/OGDH/TP53I3/NADSYN1/NMNAT3/NUP133/DCXR/HIF1A/GPD1L/NAMPT/HK2/NNT/PFKL/ENTPD5/GCK/PARP9/PFKFB2/PDXP/HKDC1/ENO1/HAAO/ALDOA/ME1/TPR/PFKP/POM121C/G6PD/RNLS/NUP210/DDIT4	61
BP	GO:0061326	renal tubule development	39/4196	103/19623	9.74e-05	0.00301708	0.00236934	WNK4/ACAT1/GATA3/HNF1B/SIX1/EYA1/SIX2/TGFB1/FGF1/FGF8/PKD2/LIF/NPNT/ADAMTS16/SIX4/IRX3/PBX1/CTNNB1/CITED1/GLI3/KIF26B/LAMA5/LGR4/STAT1/POU3F3/PROM1/OSR1/CD24/WT1/GDNF/SALL1/HOXA11/VEGFA/PGF/HOXB7/DCHS1/WNT11/GREM1/FOXD1	39
BP	GO:0009161	ribonucleoside monophosphate metabolic process	111/4196	375/19623	0.000100022	0.00308232	0.00242057	OGDHL/ATP6V1B1/ATP1B1/CHCHD10/UPP1/TCIRG1/PFKFB3/PRKAG2/ATP5S/SDHA/PPARGC1A/STAT3/ESRRB/CDK1/ATP6V1A/PARP1/TGFB1/PPARA/MSH2/GMPS/TSPO/CCNB1/ND4/ND4L/ATP8/COQ9/NUP107/BPGM/MPP1/ATP6/CYTB/PRKAA2/ND5/RAE1/NUP58/NUP160/PRPS2/COX1/NDUFV1/COX3/NUP205/COX2/ND6/ND3/ND1/NUP155/ATIC/GALK1/NDUFS7/NDC1/ATP5F1D/VPS9D1/NUP153/OGDH/ND2/PINK1/FAM20C/TJP2/OLA1/NUP133/BEND3/UCK2/HIF1A/GMPR2/PPAT/SDHD/SURF1/HK2/CTN…	111
BP	GO:0072659	protein localization to plasma membrane	81/4196	258/19623	0.000103449	0.00315997	0.00248155	ATP1B1/PRKCH/BCL2L1/GPER1/ARHGEF16/KCNIP4/TMEM88/CDH2/INPP5K/SKAP1/TSPAN33/SQSTM1/TGFB1/CIB1/STX4/EZR/PKDCC/S100A10/GAS6/PLS1/VAMP8/RILPL2/OPTN/TMEM150A/RAP2A/VAMP2/JUP/CDH1/TTC7A/F11R/PPP2R5A/LYPD1/TMBIM1/RER1/MAP7/LDLRAP1/PICALM/TMEM59/EHD3/TSPAN15/ATP1B3/ITGA3/FLOT2/RAMP2/ANK3/LRP6/RAB40B/CLIP3/ANXA2/LAMA5/EFR3A/RAMP1/ARHGAP44/DAB2/ZDHHC22/CACNB3/AKAP5/ZDHHC23/VAMP5/PIP5K1A/FAM126A/AR/NSG1/EHD…	81
BP	GO:0009201	ribonucleoside triphosphate biosynthetic process	56/4196	164/19623	0.000103878	0.00315997	0.00248155	OGDHL/CHCHD10/TCIRG1/PFKFB3/PRKAG2/ATP5S/PPARGC1A/STAT3/ESRRB/PARP1/TGFB1/PPARA/ATP8/NUP107/BPGM/ATP6/PRKAA2/RAE1/NUP58/NUP160/NUP205/CTPS2/NUP155/GALK1/NDC1/ATP5F1D/VPS9D1/NUP153/OGDH/PINK1/NME3/NME5/NUP133/UCK2/HIF1A/SURF1/HK2/ATP5MC1/PFKL/ENTPD5/CTPS1/ATP5PD/GCK/PFKFB2/NME1/CAD/CYC1/HKDC1/ENO1/ALDOA/TPR/PFKP/POM121C/COX5B/NUP210/DDIT4	56
BP	GO:0046683	response to organophosphorus	48/4196	135/19623	0.000104028	0.00315997	0.00248155	KCNQ1/RAPGEF3/TEK/PDE2A/PTK2B/TRPM4/AKR1C1/AQP1/TYMS/JUNB/INPP5K/FOSB/PTGS2/EZR/PER1/AHR/PKD2/DUSP1/KDM1A/CDO1/FOS/APP/RFC3/APEX1/DMTN/MMP19/SDC1/CASP1/CITED1/AKAP6/FDX1/STAR/THBD/STAT1/STC1/WT1/PTAFR/P2RX6/CIB2/PDXP/NME1/SELL/SREBF1/JUND/CRLS1/IGFBP5/PPARGC1B/PIK3CG	48
BP	GO:0002062	chondrocyte differentiation	38/4196	100/19623	0.000108909	0.0032843	0.00257919	SCIN/COL2A1/SIX2/FGFR3/TGFB1/PKDCC/PTH1R/TGFBR2/MEX3C/BMPR1A/POC1A/FGF9/BMPR1B/HMGA2/ZBTB16/CTNNB1/SOX6/BMP6/FGFR1/GLI3/ACVRL1/OSR1/COL27A1/ADAMTS7/EFEMP1/CHST11/NKX3-2/LOXL2/HOXA11/CTGF/NFIB/WNT5B/GPLD1/GREM1/NOV/CHADL/SNAI2/SCX	38
BP	GO:1902041	regulation of extrinsic apoptotic signaling pathway via death domain receptors	26/4196	60/19623	0.000109151	0.0032843	0.00257919	NOS3/TRADD/ICAM1/TNFSF10/BCL2L1/MAL/LGALS3/HMGB2/STX4/CFLAR/ATF3/BRCA1/BMPR1B/SP100/CASP8/TMBIM1/SERPINE1/RNF34/TIMP3/THBS1/TMC8/DAPK1/TNFRSF10B/TNFAIP3/HGF/FAIM2	26
BP	GO:0007178	transmembrane receptor protein serine/threonine kinase signaling pathway	107/4196	360/19623	0.000110655	0.00331393	0.00260245	PBLD/NREP/GDF15/SOX11/FSTL3/CGN/PARD6A/DUSP15/TTK/TOB1/TGIF2/FBXL15/GDF1/LNPEP/PARP1/TGFB1/ACVR1B/SMAD5/RBPMS/DNM2/ENG/MAP3K7/FGF8/FURIN/MAPK3/SIRT1/CHRD/VASN/TGFBR2/RBPJ/BMPR1A/ZCCHC12/SOSTDC1/KLF10/FGF9/NPNT/CTDSPL2/FOS/ADAMTSL2/CAV2/BMPR1B/HFE/PEG10/GIPC1/PXN/ZNF423/F11R/ROR2/RGMA/GDF11/ACVR2B/AMHR2/HSP90AB1/ZCCHC18/EGR1/SMAD9/CYR61/ITGA3/LRP2/CITED1/BMP6/ZNF703/THBS1/STRAP/ACVRL1/BMP7/NEO1/SD…	107
BP	GO:0006898	receptor-mediated endocytosis	93/4196	305/19623	0.000111196	0.00331457	0.00260295	CEACAM1/TINAGL1/ILDR1/SGIP1/APOL1/WASF1/ARRB1/CLN3/LMBRD1/CFI/NECAB2/DNM2/LDLRAD3/CXCL16/LRP10/EZR/CD9/TGFBR2/CD81/CLTB/CALCRL/SCARF1/ARHGAP27/CAV2/STAB1/PIK3CB/HFE/SUSD2/PLCG2/CTTN/LRPAP1/ENPP2/LDLRAP1/PICALM/SERPINE1/HBA2/CLU/LOXL3/LOXL4/LRP2/DNM3/RAMP2/LRP6/PGBD1/SH3GL2/CD2AP/ANXA2/REPS1/SDCBP/LGALS3BP/RAMP1/AP2A2/LRRTM1/DAB2/CUBN/HBB/SSC5D/HSPH1/B2M/AAK1/MAGI2/CACNG4/SNAP25/MEGF10/ADM/CCL21/A…	93
BP	GO:0007015	actin filament organization	121/4196	416/19623	0.00011388	0.00337879	0.00265339	SCIN/RAPGEF3/EPS8L2/PLEKHH2/PTK2B/COBLL1/ACTR3C/STMN1/F2RL1/ICAM1/KANK3/PRKN/WASF1/SDC4/TRPV4/ARRB1/CARMIL1/ARHGEF10L/RHOD/INPP5K/MARCKS/SSH3/FRY/ARHGAP18/CAPG/ARPC1B/TMSB15B/ARHGEF15/MYO1C/VASP/SPTBN2/EZR/WASF3/ADD2/S1PR1/ARHGAP6/TNFAIP1/S100A10/ABI2/PLS1/TMSB15B/IGSF22/COBL/PHACTR1/EPHA1/TMSB15A/SHROOM4/PXN/DMTN/RHOBTB1/EFS/EPS8L1/CTTN/EVL/SYNPO/DSTN/RHOB/SHROOM1/RHOC/CDC42EP2/BCAR1/WDR1/FSCN1/…	121
BP	GO:0071604	transforming growth factor beta production	16/4196	30/19623	0.000120615	0.00356204	0.00279729	CX3CL1/MYB/PTGS2/FURIN/LGALS9/LAPTM4B/ATP6AP2/HSP90AB1/CD46/HIF1A/THBS1/CD2AP/CD34/CD24/LTBP3/WNT11	16
BP	GO:0019395	fatty acid oxidation	39/4196	104/19623	0.000124062	0.00364696	0.00286398	ACADS/ACAT1/ACAA1/ETFDH/PRKAG2/PPARG/FABP3/ACADVL/PPARGC1A/HADHB/CYP4V2/CPT1A/PPARA/AUH/AMACR/NR4A3/MLYCD/PECR/DECR1/ETFBKMT/ACAA2/ETFB/PHYH/PDK4/ECH1/SCP2/SLC27A2/PEX7/ACACB/CRAT/CROT/ECI1/BDH2/PPARD/ECHDC2/DGAT2/PPARGC1B/CNR1/CPT1C	39
BP	GO:0007051	spindle organization	72/4196	225/19623	0.000127216	0.0037057	0.00291011	BIRC3/TUBB/STMN1/CCDC69/TPX2/KIF11/SPAG5/NDC80/PARP3/TTK/BIRC5/CDC20/SPAST/CENPE/AURKB/MYBL2/NEK2/PRC1/RACGAP1/KIFC1/PSRC1/SPC25/ASPM/KIF4A/SMC3/TACC3/NUF2/CCNB1/FBXO5/KNSTRN/RANBP1/EZR/PLK1/AURKA/KIF23/CKAP5/RAE1/KPNB1/BORA/CHMP2A/POC1A/HAUS6/STIL/SBDS/ESPL1/WDR62/KIF3B/CHEK2/AUNIP/RAN/KIF2A/TNKS/SMC1A/SPICE1/TUBGCP3/CEP72/CEP97/HAUS1/CCSAP/FSD1/HAUS8/RCC1/HAUS3/GPSM2/TBCE/MYH9/GNAI1/HAUS5/MZT1/…	72
BP	GO:0019359	nicotinamide nucleotide biosynthetic process	48/4196	136/19623	0.000127803	0.0037057	0.00291011	OGDHL/PFKFB3/PRKAG2/NMRK1/PPARGC1A/STAT3/ESRRB/PPARA/PTGS2/NUP107/BPGM/PNP/PRKAA2/NAPRT/PARP10/RAE1/NUP58/NUP160/IDH2/NUP205/NUP155/GALK1/NDC1/NUP153/NNMT/OGDH/NADSYN1/NMNAT3/NUP133/HIF1A/NAMPT/HK2/PFKL/ENTPD5/GCK/PARP9/PFKFB2/HKDC1/ENO1/HAAO/ALDOA/ME1/TPR/PFKP/POM121C/RNLS/NUP210/DDIT4	48
BP	GO:0019363	pyridine nucleotide biosynthetic process	48/4196	136/19623	0.000127803	0.0037057	0.00291011	OGDHL/PFKFB3/PRKAG2/NMRK1/PPARGC1A/STAT3/ESRRB/PPARA/PTGS2/NUP107/BPGM/PNP/PRKAA2/NAPRT/PARP10/RAE1/NUP58/NUP160/IDH2/NUP205/NUP155/GALK1/NDC1/NUP153/NNMT/OGDH/NADSYN1/NMNAT3/NUP133/HIF1A/NAMPT/HK2/PFKL/ENTPD5/GCK/PARP9/PFKFB2/HKDC1/ENO1/HAAO/ALDOA/ME1/TPR/PFKP/POM121C/RNLS/NUP210/DDIT4	48
BP	GO:0071384	cellular response to corticosteroid stimulus	28/4196	67/19623	0.000129895	0.00370633	0.00291061	EDN1/ICAM1/GPER1/AQP1/KLF9/TGFB1/ZFP36/CFLAR/AIFM1/ATP2B1/CBX3/ND3/ERRFI1/GSTP1/RAN/TFAP4/FECH/ZFP36L2/STAR/AKR1C3/SSTR2/STC1/ANXA1/HEY1/DNMT3B/NR3C1/EGFR/DDIT4	28
BP	GO:0015988	energy coupled proton transmembrane transport, against electrochemical gradient	17/4196	33/19623	0.00013063	0.00370633	0.00291061	ATP6V1B1/ATP6V1C2/TCIRG1/ATP1A1/ATP6V1A/ND4/ATP6V1E1/ATP6V0C/COX1/ATP6V0E1/ATP6AP1/NDUFS7/ATP6V0D1/ATP5MC1/ATP6V0B/ATP6V1F/ATP6V0E2	17
BP	GO:1902100	negative regulation of metaphase/anaphase transition of cell cycle	17/4196	33/19623	0.00013063	0.00370633	0.00291061	BUB1B/BUB1/NDC80/TTK/CENPF/TRIP13/CCNB1/RAD21/MAD2L1/PLK1/CDT1/DUSP1/GEN1/DYNC1LI1/MAD2L2/CDK5RAP2/TPR	17
BP	GO:0007548	sex differentiation	86/4196	279/19623	0.000131213	0.00370633	0.00291061	NOS3/TLR5/FSTL3/TLR3/ICAM1/GATA3/TNFSF10/BCL2L1/CENPI/BRIP1/KITLG/DACH1/ARRB1/CDKL2/ASPM/KIF18A/HMGB2/MSH2/ACVR1B/SMAD5/PCYT1B/FGF8/ADGRG1/CNOT9/NUP107/LHFPL2/SIRT1/CBX2/ADCYAP1R1/BMPR1A/FGF9/CHD7/BOK/BMPR1B/BRCA2/FANCG/SIX4/MMP19/IRX5/RRM1/ROR2/PBX1/NASP/SDC1/AMHR2/NUPR1/CTNNB1/ADAMTS1/ROBO2/CEBPB/TEX15/LRP2/DMRT2/BMP6/CNTFR/LRP6/SLIT2/STAR/ADAM15/FANCA/MERTK/LGR4/DMRT3/AKR1C3/IMMP2L/TYRO3/DHCR2…	86
BP	GO:0050679	positive regulation of epithelial cell proliferation	64/4196	195/19623	0.000131311	0.00370633	0.00291061	HYAL1/TEK/SOX11/FZD7/EYA1/NR4A1/ESRP2/HPN/STAT3/PDGFB/HMGB1/VASH2/TNFSF12/B4GALT1/HMGB2/TGFB1/FGF1/NR4A3/CFLAR/STAT5A/SIRT1/BMPR1A/IQGAP3/FGF9/RTN4/CAV2/F3/PPP1R16B/EGFL7/KDM5B/CTNNB1/ERBB2/BMP6/HAS2/HIF1A/ZNF703/FGFR1/FLT4/ACVRL1/STOX1/SCN5A/EGR3/KDR/MST1/CDH13/OSR1/PRKD1/AR/AGTR1/ID1/VEGFB/CYBA/NME1/ANG/CCL5/APLNR/VEGFA/TNFAIP3/THBS4/PGF/NRP2/EGFR/LAMC1/AKT3	64
BP	GO:0051216	cartilage development	64/4196	195/19623	0.000131311	0.00370633	0.00291061	HYAL1/SCIN/EDN1/ESRRA/COL2A1/SIX2/TRPV4/TYMS/FGFR3/TGFB1/SMAD5/MAPK3/PKDCC/PTH1R/TGFBR2/HYAL2/MEX3C/MYCN/BMPR1A/ITGB8/POC1A/FGF9/BMPR1B/HMGA2/THRA/ROR2/ZBTB16/EVC/CTNNB1/SMAD9/UNCX/CYR61/SOX6/BMP6/HIF1A/SATB2/FGFR1/GLI3/LRP6/ACVRL1/BMP7/STC1/OSR1/COL27A1/ADAMTS7/EFEMP1/CHST11/NKX3-2/LOXL2/HOXA11/CTGF/SNAI1/NFIB/CD44/WNT11/WNT5B/GPLD1/GREM1/COL11A2/NOV/CHADL/SNAI2/SCX/BMP8B	64
BP	GO:0072010	glomerular epithelium development	13/4196	22/19623	0.000132904	0.00373478	0.00293295	KLF15/FOXJ1/CD34/PECAM1/PODXL/IQGAP1/PROM1/CD24/WT1/LAMB2/MAGI2/FOXC2/MYO1E	13
BP	GO:1905819	negative regulation of chromosome separation	18/4196	36/19623	0.000136882	0.00382969	0.00300748	BUB1B/BUB1/NDC80/TTK/CENPF/TRIP13/PTTG1/CCNB1/RAD21/MAD2L1/PLK1/CDT1/DUSP1/GEN1/DYNC1LI1/MAD2L2/CDK5RAP2/TPR	18
BP	GO:0009167	purine ribonucleoside monophosphate metabolic process	107/4196	362/19623	0.000140286	0.00390302	0.00306507	OGDHL/ATP6V1B1/ATP1B1/CHCHD10/TCIRG1/PFKFB3/PRKAG2/ATP5S/SDHA/PPARGC1A/STAT3/ESRRB/CDK1/ATP6V1A/PARP1/TGFB1/PPARA/MSH2/GMPS/TSPO/CCNB1/ND4/ND4L/ATP8/COQ9/NUP107/BPGM/MPP1/ATP6/CYTB/PRKAA2/ND5/RAE1/NUP58/NUP160/PRPS2/COX1/NDUFV1/COX3/NUP205/COX2/ND6/ND3/ND1/NUP155/ATIC/GALK1/NDUFS7/NDC1/ATP5F1D/VPS9D1/NUP153/OGDH/ND2/PINK1/FAM20C/TJP2/OLA1/NUP133/BEND3/HIF1A/GMPR2/PPAT/SDHD/SURF1/HK2/CTNS/ATP5MC1/…	107
BP	GO:0001658	branching involved in ureteric bud morphogenesis	27/4196	64/19623	0.000140727	0.00390302	0.00306507	HNF1B/SIX1/EYA1/SIX2/TGFB1/FGF1/FGF8/PKD2/NPNT/ADAMTS16/SIX4/PBX1/CTNNB1/CITED1/GLI3/LAMA5/LGR4/WT1/GDNF/SALL1/HOXA11/VEGFA/PGF/HOXB7/DCHS1/GREM1/FOXD1	27
BP	GO:0070293	renal absorption	11/4196	17/19623	0.000142697	0.0039067	0.00306796	KCNQ1/WNK4/AQP3/SGK1/HYAL2/GAS6/CLDN4/HAS2/GSN/AKR1C3/HBB	11
BP	GO:0070884	regulation of calcineurin-NFAT signaling cascade	11/4196	17/19623	0.000142697	0.0039067	0.00306796	RCAN1/CIB1/LMCD1/CHP1/RCAN2/ERBB3/AKAP6/NFAT5/SLC9A1/PRNP/RCAN3	11
BP	GO:0106056	regulation of calcineurin-mediated signaling	11/4196	17/19623	0.000142697	0.0039067	0.00306796	RCAN1/CIB1/LMCD1/CHP1/RCAN2/ERBB3/AKAP6/NFAT5/SLC9A1/PRNP/RCAN3	11
BP	GO:0048511	rhythmic process	87/4196	284/19623	0.000152435	0.00412979	0.00324315	TOP2A/NOS3/USP2/HDAC2/HNF1B/CAVIN3/NONO/PPARG/TYMS/KLF9/PPARGC1A/MMP7/ARRB1/HLF/BHLHE40/PPP1CC/HNRNPR/ADNP/CPT1A/PPARA/SUV39H2/NAGLU/NFKB2/EZH2/SIRT1/TOP1/PRKAA2/PRKDC/CDK5R1/NR1D1/PER1/AHR/NMU/PROKR1/EGR2/KLF10/BMPR1B/CBX3/HEBP1/MMP19/TIMELESS/KDM5B/MAP2K6/ADAMTS1/ROBO2/DHX9/SERPINE1/EGR1/TEF/ASS1/PCNA/KAT2B/ARNTL/CSNK1E/BHLHE41/CLDN4/HAS2/CRY2/SLIT2/NAMPT/STAR/CDK4/CREBBP/EGR3/LGR4/GNA11/GPR157…	87
BP	GO:0060541	respiratory system development	68/4196	211/19623	0.000152613	0.00412979	0.00324315	CTSH/NOS3/SOX11/FSTL3/THRB/KLF2/SIX1/EPAS1/ESRP2/SP3/FGF1/FGF8/MAPK3/PKDCC/TGFBR2/CTSZ/RBPJ/MYCN/BMPR1A/LIF/FGF9/CHD7/ADAMTSL2/FOXJ1/THRA/HS6ST1/SIX4/PTK7/TIMELESS/SMCHD1/ACVR2B/ERRFI1/DNAAF1/CTNNB1/VANGL2/LOXL3/HEG1/ITGA3/CRISPLD2/PDPN/FGFR1/FLT4/GLI3/LRP6/PHF14/LAMA5/WT1/PDGFA/TNS3/ALDH1A3/ID1/CELSR1/RIDA/HHEX/CTGF/SREBF1/RAB3A/VEGFA/LOX/NFIB/LEF1/HYDIN/WNT11/EGFR/ABCA12/IGFBP5/STRA6/DLG5	68
BP	GO:0006637	acyl-CoA metabolic process	43/4196	119/19623	0.000153689	0.00412979	0.00324315	ACSL1/ACSL5/ACOT11/MVK/ACSS1/ELOVL7/ACAT1/MPC1/NUDT7/ELOVL1/HMGCL/ELOVL2/HSD17B8/SCD/PDHA1/MLYCD/SLC25A1/ACSL4/ACOT4/ACSM3/MPC2/ELOVL5/PDK4/OGDH/PDP1/SUCLG1/SUCLG2/MCEE/ACACB/ACOT2/SCD5/PDP2/PMVK/AADAT/ACOT1/DBI/ACSF3/ACSS2/ACOT7/HACD1/FASN/DGAT2/SNCA	43
BP	GO:0035383	thioester metabolic process	43/4196	119/19623	0.000153689	0.00412979	0.00324315	ACSL1/ACSL5/ACOT11/MVK/ACSS1/ELOVL7/ACAT1/MPC1/NUDT7/ELOVL1/HMGCL/ELOVL2/HSD17B8/SCD/PDHA1/MLYCD/SLC25A1/ACSL4/ACOT4/ACSM3/MPC2/ELOVL5/PDK4/OGDH/PDP1/SUCLG1/SUCLG2/MCEE/ACACB/ACOT2/SCD5/PDP2/PMVK/AADAT/ACOT1/DBI/ACSF3/ACSS2/ACOT7/HACD1/FASN/DGAT2/SNCA	43
BP	GO:0006109	regulation of carbohydrate metabolic process	60/4196	181/19623	0.000154082	0.00412979	0.00324315	PTK2B/PRKN/IGF2/PHLDA2/PFKFB3/PRKAG2/GPER1/PPARGC1A/STAT3/ESRRB/PDGFB/INPP5K/TGFB1/PPARA/C1QTNF1/MLYCD/NUP107/BPGM/SIRT1/PTH1R/PRKAA2/NR1D1/ADCYAP1R1/RAE1/NUP58/NUP160/NUP205/SLC45A3/NUP155/DYRK2/NDC1/NUP153/LEPR/PDK4/KAT2B/NUP133/HAS2/HIF1A/ACACB/NFKB1/ENTPD5/MST1/IGFBP4/PPP1R3B/GCK/DUSP12/PFKFB2/PTAFR/HRH1/TPR/DGAT2/RORA/GPLD1/POM121C/P2RY1/IGFBP5/NUP210/SNCA/DDIT4/ENPP1	60
BP	GO:0090130	tissue migration	103/4196	347/19623	0.000155341	0.00414612	0.00325598	HYAL1/PBLD/CEACAM1/EDN1/TEK/CTSH/PTK2B/RAB25/ZC3H12A/NOS3/ITGA2/SEMA4A/ROBO1/GATA3/MMRN2/NR4A1/CD40/PPARG/HBEGF/PDGFB/MARVELD3/HMGB1/TNFSF12/TGFB1/CIB1/PTGS2/ANLN/FGF1/FGF8/NFE2L2/SPRED1/STAT5A/SIRT1/KLF4/TBXA2R/TGFBR2/GLIPR2/RTN4/ANXA3/SOX18/GIPC1/PXN/PRKX/PRCP/EPB41L4B/SP100/DPP4/JUP/MAP2K3/ENPP2/EVL/SYNJ2BP/EFNA1/RHOB/NR2F2/STARD13/SASH1/ITGA3/CARD10/HAS2/HIF1A/BCAR1/THBS1/FGFR1/FLT4/STRAP/PLC…	103
BP	GO:0046822	regulation of nucleocytoplasmic transport	39/4196	105/19623	0.000157087	0.00417185	0.00327618	RAPGEF3/PDE2A/ZC3H12A/LRRK2/KHDRBS1/CPSF6/PPP1CC/IPO5/CDK1/XPO1/TGFB1/PTGS2/GTSE1/BARD1/SIRT1/HYAL2/GAS6/PARP10/NUP58/ECT2/ANP32B/CTDSPL2/SP100/CHP1/JUP/NUP153/HSP90AB1/DHX9/IFI27/MDFIC/TMEM173/GLI3/SOX4/NUDT4/XPO5/PRKCD/TPR/MX2/PTPN14	39
BP	GO:0009126	purine nucleoside monophosphate metabolic process	107/4196	363/19623	0.000157686	0.00417185	0.00327618	OGDHL/ATP6V1B1/ATP1B1/CHCHD10/TCIRG1/PFKFB3/PRKAG2/ATP5S/SDHA/PPARGC1A/STAT3/ESRRB/CDK1/ATP6V1A/PARP1/TGFB1/PPARA/MSH2/GMPS/TSPO/CCNB1/ND4/ND4L/ATP8/COQ9/NUP107/BPGM/MPP1/ATP6/CYTB/PRKAA2/ND5/RAE1/NUP58/NUP160/PRPS2/COX1/NDUFV1/COX3/NUP205/COX2/ND6/ND3/ND1/NUP155/ATIC/GALK1/NDUFS7/NDC1/ATP5F1D/VPS9D1/NUP153/OGDH/ND2/PINK1/FAM20C/TJP2/OLA1/NUP133/BEND3/HIF1A/GMPR2/PPAT/SDHD/SURF1/HK2/CTNS/ATP5MC1/…	107
BP	GO:0043542	endothelial cell migration	81/4196	261/19623	0.000158267	0.00417185	0.00327618	CEACAM1/EDN1/TEK/PTK2B/ZC3H12A/NOS3/SEMA4A/ROBO1/GATA3/MMRN2/NR4A1/CD40/PPARG/PDGFB/HMGB1/TNFSF12/TGFB1/CIB1/PTGS2/FGF1/NFE2L2/SPRED1/STAT5A/SIRT1/KLF4/TBXA2R/ANXA3/SOX18/GIPC1/PXN/PRKX/PRCP/SP100/DPP4/JUP/MAP2K3/SYNJ2BP/EFNA1/RHOB/NR2F2/STARD13/SASH1/CARD10/HIF1A/BCAR1/THBS1/FGFR1/FLT4/PLCG1/SLIT2/AMOTL1/ACVRL1/ITGB1BP1/SRPX2/EGR3/RGCC/KDR/CDH13/STC1/ANXA1/ATOH8/RHOJ/PRKD1/MYH9/BMPER/CYP1B1/ID1/…	81
BP	GO:0001933	negative regulation of protein phosphorylation	132/4196	464/19623	0.000168083	0.00440628	0.00346028	PBLD/CEACAM1/INPP5J/ZC3H12A/ZFYVE28/MVP/LRRK2/GADD45B/CISH/F2RL1/PRKN/PARD6A/PRKAG2/GPER1/PPP1R1A/PRR5L/GPRC5A/PPARGC1A/ARRB1/MARVELD3/IPO5/INPP5K/PBK/SOCS3/DEPTOR/TGFB1/CIB1/CCNB1/ENG/NPM1/SPRED1/EZR/SIRT1/GADD45A/PLK1/KLF4/TNIP1/PRKDC/HYAL2/LYN/PER1/SOCS1/NDRG2/ATF3/LIF/DUSP2/DUSP1/SMPD1/EPHA1/TAOK3/RPS6KA6/DUSP3/DUSP9/DMTN/FOXM1/SIRT3/LRTM2/CHP1/ERRFI1/H2AFY/GSTP1/PINK1/SYNJ2BP/TFAP4/EFNA1/SAM…	132
BP	GO:0042542	response to hydrogen peroxide	49/4196	141/19623	0.000168542	0.00440628	0.00346028	PTK2B/LRRK2/KLF2/IL18BP/HDAC2/AQP1/MAPK13/CRYAB/MYB/CDK1/NR4A3/NFE2L2/EZH2/SIRT1/KLF4/AIFM1/MAP1LC3A/ND5/ENDOG/DUSP1/ECT2/CAT/APEX1/KPNA4/ND6/SDC1/STAT6/NQO1/PINK1/HBA2/RHOB/PCNA/PSAP/MAP3K5/STAR/TXNIP/STAT1/ANXA1/HBB/CST3/HSPH1/CASP3/CYP1B1/MET/PRKCD/TNFAIP3/KCNA5/HGF/PYCR1	49
BP	GO:1904029	regulation of cyclin-dependent protein kinase activity	36/4196	95/19623	0.000174113	0.00453332	0.00356005	CNPPD1/CDC25C/CDC6/PDGFB/SERTAD1/IPO5/PSRC1/BLM/CCNB1/PKMYT1/GADD45A/PLK1/CDK5R1/CCNE2/PKD2/CDC25A/CDKN3/CKS2/TFAP4/NR2F2/KAT2B/CDK4/STOX1/CKS1B/CCND2/HEXIM2/CCNG1/RGCC/INCA1/CASP3/HHEX/CDKN2A/MAPRE3/TNFAIP3/DIRAS3/EGFR	36
BP	GO:0016052	carbohydrate catabolic process	63/4196	193/19623	0.000175235	0.004544	0.00356844	OGDHL/RBKS/CRYL1/PFKFB3/PRKAG2/ALDH1A1/PPARGC1A/CTBS/STAT3/ESRRB/PPARA/IDNK/GAA/NUP107/BPGM/GALM/PRKAA2/GK5/RAE1/NUP58/MAN2B2/NUP160/NUP205/KHK/TKFC/NUP155/GALK1/NEU1/NDC1/GALE/NUP153/ENOSF1/OGDH/MANBA/FUT2/GLB1/NUP133/GK/DCXR/HIF1A/HK2/PFKL/PGGHG/ENTPD5/PYGB/PPP1R3B/GCK/PFKFB2/GYG2/PHKA1/PGM5/HKDC1/CALM1/ENO1/ALDOA/TPR/GYG1/PFKP/POM121C/NEU4/NUP210/DDIT4/DHDH	63
BP	GO:0046434	organophosphate catabolic process	73/4196	231/19623	0.000176797	0.00454884	0.00357223	RAPGEF3/PDE2A/OGDHL/UPP1/IMPA2/PDE8B/PFKFB3/PRKAG2/PDE1A/NUDT7/PPARGC1A/STAT3/ESRRB/INPP5K/ABHD12/PDE7A/NEIL1/PPARA/PDE4A/NUP107/BPGM/PNP/PRKAA2/RAE1/NUP58/PLA2G15/CNP/PDE7B/NUP160/SMPD1/SYNJ1/NUP205/NUP155/INPP1/GALK1/NDC1/PLCG2/NUP153/PNPLA6/OGDH/ENPP2/TDG/PLA2G4A/NUP133/HIF1A/GPD1L/PLCG1/HK2/DNPH1/PFKL/ENTPD5/MTMR7/NUDT4/GCK/PFKFB2/PDXP/LIPG/HKDC1/ENO1/SMPD4/ALDOA/NUDT11/PRKCD/APOC1/TPR/PFKP/P…	73
BP	GO:1901293	nucleoside phosphate biosynthetic process	115/4196	396/19623	0.00017784	0.00454884	0.00357223	OGDHL/PTK2B/NOS3/AK7/ACAT1/CHCHD10/UPP1/TCIRG1/PFKFB3/PRKAG2/ATP5S/NMRK1/GPER1/FUK/AQP1/TYMS/PPARGC1A/STAT3/ESRRB/SHMT1/ADNP/PARP1/TGFB1/PPARA/GMPS/PTGS2/RRM2/ATP8/NUP107/BPGM/PNP/ATP6/PRKAA2/NAPRT/PAPSS2/PARP10/RAE1/NUP58/NUP160/PRPS2/NPR1/IDH2/NUP205/CTPS2/TK2/NUP155/ATIC/GALK1/RRM1/NDC1/ATP5F1D/VPS9D1/NUP153/NNMT/OGDH/EDNRB/RRM2B/PINK1/AK8/SUCLG1/NME3/GPR161/NADSYN1/NME5/NMNAT3/NUP133/UCK2/HIF…	115
BP	GO:0009165	nucleotide biosynthetic process	114/4196	392/19623	0.000177967	0.00454884	0.00357223	OGDHL/PTK2B/NOS3/AK7/ACAT1/CHCHD10/UPP1/TCIRG1/PFKFB3/PRKAG2/ATP5S/NMRK1/GPER1/FUK/AQP1/TYMS/PPARGC1A/STAT3/ESRRB/SHMT1/ADNP/PARP1/TGFB1/PPARA/GMPS/PTGS2/RRM2/ATP8/NUP107/BPGM/PNP/ATP6/PRKAA2/NAPRT/PAPSS2/PARP10/RAE1/NUP58/NUP160/PRPS2/NPR1/IDH2/NUP205/CTPS2/TK2/NUP155/ATIC/GALK1/RRM1/NDC1/ATP5F1D/VPS9D1/NUP153/NNMT/OGDH/EDNRB/RRM2B/PINK1/AK8/NME3/GPR161/NADSYN1/NME5/NMNAT3/NUP133/UCK2/HIF1A/RAMP…	114
BP	GO:0030509	BMP signaling pathway	56/4196	167/19623	0.000178987	0.00454884	0.00357223	GDF15/SOX11/FSTL3/TOB1/FBXL15/GDF1/TGFB1/SMAD5/ENG/FGF8/MAPK3/CHRD/RBPJ/BMPR1A/ZCCHC12/SOSTDC1/CTDSPL2/BMPR1B/HFE/ZNF423/ROR2/RGMA/ACVR2B/AMHR2/ZCCHC18/EGR1/SMAD9/CYR61/ITGA3/LRP2/BMP6/ACVRL1/BMP7/NEO1/GDF10/LRP4/CHRDL1/FKBP8/BMPER/ID1/RNF165/TGFBR3/GDF7/TMEM100/UBE2O/LEF1/ZNF8/GATA4/GREM1/RGMB/RBPMS2/CRB2/AMH/SCX/FOXD1/BMP8B	56
BP	GO:1905475	regulation of protein localization to membrane	56/4196	167/19623	0.000178987	0.00454884	0.00357223	PRKCH/PRKN/BCL2L1/GPER1/ARHGEF16/CDH2/INPP5K/SQSTM1/TGFB1/CIB1/E2F1/NECAB2/STOM/STX4/MYO1C/EZR/PKDCC/CDK5R1/PLS1/VAMP8/TP53BP2/MIEF2/DMTN/FYN/YWHAQ/CHP1/PPP2R5A/CASP8/LYPD1/TMBIM1/RER1/LDLRAP1/PICALM/TMEM59/MTCL1/ERBB2/ITGA3/ANK3/GSN/CLIP3/ITGB1BP1/PAK1/DAB2/LRP4/AKAP5/AR/FIS1/STX3/GBP1/FZD9/EGFR/WNK3/TP73/PRNP/DPP10/EPHA3	56
BP	GO:0046835	carbohydrate phosphorylation	15/4196	28/19623	0.000184267	0.00463917	0.00364318	RBKS/PFKFB3/FUK/ITPK1/IDNK/GNPTG/KHK/TKFC/GALK1/GNE/HK2/GCK/PFKFB2/HKDC1/POMK	15
BP	GO:0051984	positive regulation of chromosome segregation	15/4196	28/19623	0.000184267	0.00463917	0.00364318	CDC6/DLGAP5/SLF1/CCNB1/RAD21/CDT1/ESPL1/RAD18/H2AFY/SLF2/RCC2/SMC6/FEN1/DDX11/SIRT2	15
BP	GO:0042982	amyloid precursor protein metabolic process	23/4196	52/19623	0.000184723	0.00463917	0.00364318	GSAP/CLN3/NECAB2/LYN/APP/ITM2B/BACE2/CHRNA7/ABCG1/LDLRAP1/PICALM/EFNA1/CLU/FLOT2/ABCA7/ITM2C/DHCR24/EFNA3/NSG1/LRRTM3/SORL1/PRNP/ITM2A	23
BP	GO:0061333	renal tubule morphogenesis	33/4196	85/19623	0.000187828	0.00469865	0.00368989	WNK4/GATA3/HNF1B/SIX1/EYA1/SIX2/TGFB1/FGF1/FGF8/PKD2/NPNT/ADAMTS16/SIX4/IRX3/PBX1/CTNNB1/CITED1/GLI3/KIF26B/LAMA5/LGR4/OSR1/WT1/GDNF/SALL1/HOXA11/VEGFA/PGF/HOXB7/DCHS1/WNT11/GREM1/FOXD1	33
BP	GO:0097191	extrinsic apoptotic signaling pathway	76/4196	243/19623	0.000189727	0.00472762	0.00371263	NOS3/CX3CL1/COL2A1/TRADD/TLR3/ICAM1/TNFSF10/EYA1/BCL2L1/GPER1/G0S2/MAL/KITLG/TNFRSF12A/FGFR3/LGALS3/MLLT11/SGPP1/TNFSF12/DEPTOR/HMGB2/TGFB1/CIB1/ACVR1B/STX4/CFLAR/HYAL2/ATF3/BRCA1/BOK/BMPR1B/PHIP/ITM2B/FYN/SP100/CTTN/CASP8AP2/UNC5B/CASP8/MOAP1/TMBIM1/GSTP1/SERPINE1/EYA4/ITGAV/ERBB3/TNFRSF1B/SORT1/RNF34/TIMP3/THBS1/FGFR1/TMC8/MKNK2/WWOX/LTBR/ITM2C/CRADD/LMNA/NOL3/KRT8/CASP3/AR/CASP2/DAPK1/GDNF/DCC…	76
BP	GO:2000573	positive regulation of DNA biosynthetic process	30/4196	75/19623	0.000195162	0.00484411	0.00380412	PTK2B/HNRNPA1/AURKB/PDGFB/NEK2/PRKCQ/DSCC1/MAPK3/KLF4/CCT2/RFC4/CCT4/RFC3/RFC2/CTNNB1/TNKS/HSP90AB1/TCP1/CCT5/CCT6A/RFC5/CCT3/NVL/CHTF18/RGCC/FGFR4/HGF/GREM1/PAK3/PARM1	30
BP	GO:0045787	positive regulation of cell cycle	119/4196	413/19623	0.000196793	0.00484956	0.0038084	HYAL1/MUC1/EDN1/NUSAP1/USP2/IGF2/GPER1/SPAG5/CDC25C/CDC6/NDC80/DTL/SPAST/KIF14/AURKB/PDGFB/FAM83D/RACGAP1/DLGAP5/CCPG1/PSRC1/PLK4/CDK1/E2F7/MTBP/CDCA5/TGFB1/CDC45/E2F1/SLF1/CCNB1/KIF20B/GTSE1/NPM1/UBE2C/FGF8/RAD21/NR4A3/RANBP1/CNOT9/MAD2L1/CDK2/PPP2R5B/GADD45A/DDRGK1/AURKA/CENPJ/KIF23/CDK5R1/CDC7/BTG2/PKD2/CDT1/CDC25A/BRCA1/ECT2/POC1A/APP/DUSP3/BRCA2/HMGA2/APEX1/GIPC1/ESPL1/BTC/PHIP/CHEK1/KIF3B/E…	119
BP	GO:0046777	protein autophosphorylation	78/4196	251/19623	0.00019763	0.00484956	0.0038084	FRK/TEK/PTK2B/MVP/LRRK2/MELK/TTK/MEX3B/AURKB/PDGFB/NEK2/FGFR3/LCK/TNK1/PIM3/ACVR1B/ENG/MAPK3/PPP2R5B/AURKA/LYN/EPHA1/TOM1L1/TAOK3/RAP2A/PRKX/FYN/MOB1B/CHP1/CHEK2/FES/ERRFI1/PINK1/MKNK1/ERBB2/MAP3K21/WNK2/FGFR1/CDKL5/FLT4/FLT1/THY1/EPHB3/MKNK2/VRK1/PAK1/MAP3K10/MAP3K11/ULK3/MAPKAPK2/KDR/TYRO3/STK39/IQGAP1/MAPKAPK3/MYLK2/PDGFC/NEK10/PDGFA/PRKD1/AAK1/GPNMB/DAPK1/CAD/TNKS1BP1/CALM1/FGFR4/JAK1/VEGFA/M…	78
BP	GO:0018243	protein O-linked glycosylation via threonine	12/4196	20/19623	0.000198702	0.00484956	0.0038084	GALNT14/GALNT15/GALNT3/GALNT18/GALNT6/GALNT1/KCNA6/GALNT12/GALNT11/GALNT17/GALNT7/GALNT13	12
BP	GO:0007094	mitotic spindle assembly checkpoint	16/4196	31/19623	0.000199943	0.00484956	0.0038084	BUB1B/BUB1/NDC80/TTK/CENPF/TRIP13/CCNB1/MAD2L1/PLK1/CDT1/DUSP1/GEN1/DYNC1LI1/MAD2L2/CDK5RAP2/TPR	16
BP	GO:0071173	spindle assembly checkpoint	16/4196	31/19623	0.000199943	0.00484956	0.0038084	BUB1B/BUB1/NDC80/TTK/CENPF/TRIP13/CCNB1/MAD2L1/PLK1/CDT1/DUSP1/GEN1/DYNC1LI1/MAD2L2/CDK5RAP2/TPR	16
BP	GO:0071174	mitotic spindle checkpoint	16/4196	31/19623	0.000199943	0.00484956	0.0038084	BUB1B/BUB1/NDC80/TTK/CENPF/TRIP13/CCNB1/MAD2L1/PLK1/CDT1/DUSP1/GEN1/DYNC1LI1/MAD2L2/CDK5RAP2/TPR	16
BP	GO:0090231	regulation of spindle checkpoint	10/4196	15/19623	0.000203381	0.00490623	0.0038529	NDRG1/NDC80/CCNB1/MAD2L1/CDT1/DUSP1/GEN1/DYNC1LI1/CDK5RAP2/TPR	10
BP	GO:0023061	signal release	133/4196	470/19623	0.000204312	0.00490623	0.0038529	CLTRN/EDN1/RAPGEF3/NAAA/TRPM4/ILDR1/SOX11/LRRK2/GATA3/SLC16A1/PRKN/SLC8B1/PDE8B/HNF1B/SYTL4/SLC44A4/GPER1/TRPV4/ARRB1/KCNC4/RAB11FIP5/OXCT1/MYB/MARCKS/ICA1/GRM4/PIM3/SLC32A1/CPT1A/SLC25A4/MAP4K4/SELENOM/FAM129B/STX4/C1QTNF1/NR1D1/LYN/NMU/NAPA/NNAT/LIF/PNKD/VAMP8/ADRA2C/CHD7/SYNJ1/SPP1/TC2N/HFE/GLUD1/LIN7A/VAMP2/SIRT3/SLC30A1/DPP4/MPC2/SNCG/KDM5B/ITPR3/ACVR2B/STXBP5L/BLOC1S6/FFAR1/SYT17/TIAM1/RAPG…	133
BP	GO:0072329	monocarboxylic acid catabolic process	49/4196	142/19623	0.000204586	0.00490623	0.0038529	HOGA1/CRYL1/ACADS/ACAT1/ACAA1/ETFDH/NUDT7/ACADVL/PCCA/HADHB/CPT1A/PPARA/AUH/AMACR/MLYCD/IDNK/LPIN3/PLA2G15/FAAH/ASRGL1/PECR/DECR1/ETFBKMT/ACAA2/SLC27A4/ETFB/PHYH/ECH1/SCP2/SLC27A2/MCEE/CYP39A1/DCXR/PEX7/ACACB/ACBD5/CRAT/CROT/ECI1/BDH2/IDUA/PPARD/CEL/GLYATL2/ECHDC2/CYP26A1/ABAT/CNR1/CPT1C	49
BP	GO:1901214	regulation of neuron death	92/4196	306/19623	0.000208707	0.00498444	0.00391431	PTK2B/SOD2/LRRK2/GATA3/PRKN/MDK/CPEB4/NR4A2/NONO/SIX1/BCL2L1/PPARGC1A/STAT3/MYB/KIF14/NCOA7/MYBL2/GRM4/ADNP/PARP1/CLN3/PPARA/MSH2/CLCF1/XRCC2/FGF8/NR4A3/SIRT1/CDK5R1/AIFM1/CTSZ/BTG2/SET/CCL2/TP53BP2/BOK/FOS/RAB29/FYN/SIX4/KDM2B/CHP1/CHRNA7/UNC5B/CASP8/CTNNB1/DRAXIN/NQO1/CEBPB/HSP90AB1/PINK1/PICALM/TRIM2/EGR1/CLU/MAP3K5/ERBB3/UBE2V2/CITED1/CNTFR/HIF1A/STAR/CD34/MAP3K11/TFAP2A/TYRO3/DHCR24/WFS1/GBA…	92
BP	GO:0009112	nucleobase metabolic process	20/4196	43/19623	0.00020941	0.00498444	0.00391431	GMPR/TYMS/SHMT1/ADA2/DPYD/GMPS/ACPP/KDM1A/RRM1/ALDH6A1/CDA/UCK2/GMPR2/PPAT/TYMP/PAICS/CMPK1/CAD/PRTFDC1/APRT	20
BP	GO:0048016	inositol phosphate-mediated signaling	19/4196	40/19623	0.000213223	0.0050376	0.00395606	RCAN1/EDN1/CIB1/LMCD1/CHP1/ITPR3/RCAN2/ERBB3/AKAP6/NFATC4/NFAT5/ADGRB2/SLC9A1/NFATC1/HRH1/NFATC2/PRNP/NFATC3/RCAN3	19
BP	GO:1901985	positive regulation of protein acetylation	19/4196	40/19623	0.000213223	0.0050376	0.00395606	MUC1/RAPGEF3/GATA3/PPARGC1A/ARRB1/TGFB1/MAPK3/WBP2/LIF/BRCA1/TADA2B/ARNTL/FAM161A/RPS6KA4/SMARCB1/AUTS2/SOX4/PAXIP1/SNAI2	19
BP	GO:0010634	positive regulation of epithelial cell migration	53/4196	157/19623	0.000217481	0.00510188	0.00400655	HYAL1/EDN1/TEK/CTSH/PTK2B/RAB25/ZC3H12A/NOS3/ITGA2/GATA3/CD40/HBEGF/PDGFB/HMGB1/TGFB1/CIB1/PTGS2/FGF1/NFE2L2/STAT5A/SIRT1/TGFBR2/GLIPR2/RTN4/ANXA3/EPB41L4B/MAP2K3/ENPP2/RHOB/SASH1/ITGA3/HAS2/HIF1A/BCAR1/THBS1/FGFR1/FLT4/PLCG1/AMOTL1/ITGB1BP1/SRPX2/KDR/ANXA1/ATOH8/RHOJ/PRKD1/MET/HSPB1/FOXC2/VEGFA/NRP2/GPLD1/AKT3	53
BP	GO:1901655	cellular response to ketone	34/4196	89/19623	0.000217544	0.00510188	0.00400655	KLF2/ICAM1/AQP1/PPARG/KLF9/DCPS/TGFB1/CFLAR/SIRT1/KLF4/PRKAA2/CDC5L/AIFM1/AHR/ATP2B1/SPP1/PTGER2/CBX3/AKR1B1/ERRFI1/TFAP4/FECH/FDX1/STAR/ADCY2/AR/GNAI1/DNMT3B/MSN/ADCY5/NR3C1/EGFR/ADCY1/DDIT4	34
BP	GO:0033044	regulation of chromosome organization	100/4196	338/19623	0.000218985	0.00511686	0.00401831	MUC1/TOP2A/GATA2/LRRK2/GATA3/IGF2/HIST1H1B/PADI2/CDC6/BUB1B/HNRNPA1/BUB1/NDC80/ATAD2/PPARGC1A/TTK/CENPF/ARRB1/UHRF1/MYB/CENPE/TRIP13/AURKB/NEK2/PIF1/DLGAP5/PTTG1/GNL3/BCL6/TACC3/PARP1/CDCA5/TGFB1/CDC45/SLF1/CCNB1/WDHD1/UBE2C/RAD21/PRKCQ/MAD2L1/MAPK3/TET1/SIRT1/PLK1/MKI67/WBP2/DNMT1/SET/CDT1/PARP10/LIF/DUSP1/BRCA1/KDM1A/CCT2/CCT4/ESPL1/CHEK1/GEN1/TADA2B/CTNNB1/RIF1/H2AFY/TNKS/PINK1/DCP2/TCP1/JARID…	100
BP	GO:0045666	positive regulation of neuron differentiation	105/4196	358/19623	0.000221929	0.00516674	0.00405748	CPEB3/GATA2/PTK2B/CX3CL1/SOX11/ROBO1/RASAL1/PRKN/ETV5/CYB5D2/TNFRSF12A/L1CAM/TGIF2/GPRC5B/SHANK2/ADNP/BCL6/TCF12/CRABP2/CFLAR/TCF3/NFE2L2/EZH2/PPP2R5B/PCP4/LYN/COBL/SCARF1/ECT2/KDM1A/MUL1/ADRA2C/RTN4/MAPK6/FYN/PTK7/IRX3/FES/CDON/ENC1/ROBO2/SYT17/CAPRIN1/TIAM1/ITSN2/CSNK1E/MAP1B/ITGA3/TUBB2B/UBE2V2/NPTN/TCF4/ATP8A2/BMP6/NEDD4L/FGFR1/CDKL5/SEMA4D/SLIT2/AVIL/C21orf91/SHANK3/BMP7/CNTN1/PAK1/TENM3/PLP…	105
BP	GO:0006026	aminoglycan catabolic process	28/4196	69/19623	0.000236527	0.00548657	0.00430865	HYAL1/FUCA1/SDC4/HEXA/CTBS/GPC2/HMMR/TGFB1/NAGLU/HYAL2/CHP1/PRELP/SDC1/CEMIP2/LYG1/GNS/GALNS/GPC4/GLB1/AGRN/IDUA/SGSH/SLC9A1/BGN/LYVE1/CD44/GPC6/CSPG4	28
BP	GO:0009124	nucleoside monophosphate biosynthetic process	63/4196	195/19623	0.000241757	0.0055852	0.0043861	OGDHL/CHCHD10/UPP1/TCIRG1/PFKFB3/PRKAG2/ATP5S/TYMS/PPARGC1A/STAT3/ESRRB/SHMT1/PARP1/TGFB1/PPARA/GMPS/ATP8/NUP107/BPGM/ATP6/PRKAA2/RAE1/NUP58/NUP160/PRPS2/NUP205/TK2/NUP155/ATIC/GALK1/NDC1/ATP5F1D/VPS9D1/NUP153/OGDH/PINK1/NUP133/UCK2/HIF1A/PPAT/SURF1/HK2/ATP5MC1/PFKL/ENTPD5/PAICS/CMPK1/ATP5PD/GCK/PFKFB2/CAD/CYC1/HKDC1/PRTFDC1/ENO1/ALDOA/TPR/APRT/PFKP/POM121C/COX5B/NUP210/DDIT4	63
BP	GO:0002028	regulation of sodium ion transport	33/4196	86/19623	0.000242878	0.0055852	0.0043861	WNK4/NOS3/ATP1B1/ATP1A1/GLRX/NKAIN3/NKAIN1/TGFB1/STOM/DNM2/PER1/PRSS8/CHP1/PTPN3/ATP1B3/WNK2/NEDD4L/ANK3/GPD1L/CNTN1/SCN5A/FXYD7/STK39/OSR1/NETO2/UTRN/ACTN4/SLC9A1/SCN1B/SNTA1/WNK3/FXYD5/PKP2	33
BP	GO:0032922	circadian regulation of gene expression	24/4196	56/19623	0.000243406	0.0055852	0.0043861	USP2/HDAC2/HNF1B/CAVIN3/PPARGC1A/BHLHE40/PPP1CC/PPARA/SIRT1/TOP1/NR1D1/PER1/AHR/ARNTL/CSNK1E/BHLHE41/CRY2/NAMPT/LGR4/NGFR/RELB/NPAS2/PER3/RORA	24
BP	GO:0043280	positive regulation of cysteine-type endopeptidase activity involved in apoptotic process	52/4196	154/19623	0.000246334	0.00559698	0.00439535	CTSH/CASP10/ROBO1/TRADD/TNFSF10/GPER1/PPARG/ARRB1/LCK/CASP4/HMGB1/CFLAR/SIRT1/AIFM1/LGALS9/ANP32B/MUL1/BOK/F3/SENP1/HSPD1/CASP8AP2/CASP8/CASP1/TFAP4/NLRP1/MAP3K5/CYR61/IFI27/IFI27L2/CASP7/GSN/TNFSF15/CASC2/CRADD/NGFR/CASP3/NOD1/CASP2/DAPK1/TNFRSF10B/FIS1/EGLN3/CYCS/CTGF/FAM162A/PYCARD/ACER2/NDUFA13/APAF1/MAPT/SNCA	52
BP	GO:0009205	purine ribonucleoside triphosphate metabolic process	101/4196	343/19623	0.000246985	0.00559698	0.00439535	OGDHL/ATP6V1B1/LRRK2/ATP1B1/CHCHD10/TCIRG1/PFKFB3/PRKAG2/ATP5S/GIMAP7/NFS1/SDHA/PPARGC1A/STAT3/ESRRB/MOCS2/CDK1/ATP6V1A/PARP1/TGFB1/PPARA/MSH2/TSPO/CCNB1/ND4/ND4L/ATP8/COQ9/NUP107/BPGM/ATP6/CYTB/PRKAA2/ND5/RAE1/NUP58/NUP160/COX1/NDUFV1/COX3/NUP205/COX2/ND6/MOCS1/ND3/ND1/NUP155/GALK1/NDUFS7/NDC1/ATP5F1D/VPS9D1/NUP153/OGDH/ND2/RAN/PINK1/NME3/FAM20C/NME5/OLA1/NUP133/BEND3/HIF1A/SDHD/SURF1/HK2/CTNS/A…	101
BP	GO:0010038	response to metal ion	104/4196	355/19623	0.000248417	0.00559698	0.00439535	EDN1/AQP3/PTK2B/TNFRSF11B/CA2/FSTL3/LRRK2/SLC39A13/RASAL1/MAOB/ICAM1/PRKN/MT1E/ANXA11/NDRG1/AQP1/JUNB/ALAD/PPARGC1A/SOD3/ANXA7/CDK1/FOSB/CYB5A/PARP1/TSPO/PTGS2/CCNB1/DNMT3A/MAPK3/CYTB/MAP1LC3A/PKD2/ENDOG/DUSP1/ECT2/COX1/PTGES/FOS/APP/HFE/CAT/KHK/S100A16/DMTN/ENTPD6/SLC30A1/CDH1/ATP5F1D/ITPR3/SDC1/CASP8/NQO1/MT1F/ALG2/FECH/KCNC1/PCNA/CLDN1/BMP6/HIF1A/CACNA1G/THBS1/NEDD4L/ANK3/NFATC4/GSN/ALOX5AP/ST…	104
BP	GO:0031058	positive regulation of histone modification	35/4196	93/19623	0.000248681	0.00559698	0.00439535	MUC1/LRRK2/GATA3/HIST1H1B/PPARGC1A/ARRB1/MYB/BCL6/TGFB1/CCNB1/MAPK3/TET1/SIRT1/WBP2/DNMT1/LIF/BRCA1/KDM1A/TADA2B/CTNNB1/RIF1/PINK1/JARID2/RPS6KA4/SMARCB1/AUTS2/MTF2/PRKD1/JDP2/DNMT3B/PAXIP1/PHF19/SREBF1/VEGFA/SNAI2	35
BP	GO:0060562	epithelial tube morphogenesis	106/4196	363/19623	0.000248853	0.00559698	0.00439535	EDN1/WNK4/CTSH/SOX11/RASIP1/GATA3/HNF1B/SIX1/EYA1/SDC4/ESRP2/ETV5/SIX2/SOX17/VDR/FZD3/B4GALT1/TGFB1/ENG/KIF20B/FGF1/FGF8/TBX2/ST14/MIB1/VASP/RNF207/CSF1/TGFBR2/CTSZ/RBPJ/NOTCH4/FZD2/MYCN/PKD2/COBL/SOSTDC1/NPNT/STIL/ADAMTS16/SOX18/PRKX/TRIM71/SIX4/KDM2B/PTK7/TIMELESS/IRX3/KDM5B/PBX1/DNAAF1/SPINT1/CTNNB1/VANGL2/RHOB/STARD13/LRP2/CITED1/HIF1A/GLI3/LRP6/NFATC4/KIF26B/SLIT2/GBX2/ACVRL1/LAMA5/BMP7/STOX…	106
BP	GO:0051591	response to cAMP	37/4196	100/19623	0.000250061	0.00559698	0.00439535	KCNQ1/RAPGEF3/TEK/PDE2A/PTK2B/AQP1/JUNB/INPP5K/FOSB/EZR/PER1/AHR/PKD2/DUSP1/KDM1A/CDO1/FOS/APP/APEX1/DMTN/MMP19/SDC1/CITED1/AKAP6/FDX1/STAR/THBD/STAT1/STC1/WT1/PTAFR/NME1/SREBF1/JUND/IGFBP5/PPARGC1B/PIK3CG	37
BP	GO:1905269	positive regulation of chromatin organization	37/4196	100/19623	0.000250061	0.00559698	0.00439535	MUC1/LRRK2/GATA3/HIST1H1B/PPARGC1A/ARRB1/MYB/BCL6/TGFB1/CCNB1/MAPK3/TET1/SIRT1/WBP2/DNMT1/LIF/BRCA1/KDM1A/TADA2B/CTNNB1/RIF1/PINK1/JARID2/RPS6KA4/SMARCB1/SETDB1/AUTS2/MTF2/PRKD1/JDP2/DNMT3B/PAXIP1/PHF19/SREBF1/VEGFA/TPR/SNAI2	37
BP	GO:0007389	pattern specification process	128/4196	452/19623	0.000257468	0.00574261	0.00450971	EDN1/HNF1B/SIX1/EYA1/SIX2/BICC1/NEK8/SOX17/FBXL15/DYNC2LI1/MEOX1/ARC/MNS1/SMAD5/XRCC2/ENG/FGF1/FGF8/ADGRG1/TBX2/MIB1/RNF207/CHRD/DSCAML1/AURKA/PRKDC/TGFBR2/RBPJ/BTG2/TBX6/PKD2/BMPR1A/COBL/ETS2/EGR2/SOSTDC1/DLL3/STIL/PGAP1/BMPR1B/FOXJ1/SOX18/ARMC4/KIF3B/KDM2B/IRX3/ROR2/GDF11/ACVR2B/ZBTB16/PBX1/CDON/DNAAF1/CTNNB1/VANGL2/ATP6AP2/RNF2/BMI1/GPR161/NR2F2/UNCX/VAX2/RFX3/LRP2/HOXD8/DMRT2/CITED1/CXXC4/HIF…	128
BP	GO:0001503	ossification	116/4196	404/19623	0.000273154	0.00605018	0.00475125	KL/TEK/PTK2B/TRPM4/ATP6V1B1/SOX11/ESRRA/FSTL3/COL2A1/RBMX/IGF2/TUFT1/ZHX3/OSTF1/SIX2/JUNB/TP53INP2/SP3/SYNCRIP/TOB1/FBXL15/FGFR3/TGFB1/SMAD5/PTGS2/MMP16/MAPK3/CHRD/PKDCC/CSF1/PTH1R/S1PR1/RBPJ/BMPR1A/EGR2/KLF10/ALYREF/FGF9/NPNT/BMPR1B/ATP6AP1/SPP1/CAT/SBDS/THRA/RSL1D1/ROR2/ACVR2B/ZBTB16/PBX1/CCDC47/CTNNB1/COL13A1/IARS/CEBPB/DHX9/FAM20C/CYR61/SORT1/CITED1/BMP6/HIF1A/SATB2/PEX7/FBL/GLI3/LRP6/SEMA4D/…	116
BP	GO:0010948	negative regulation of cell cycle process	116/4196	404/19623	0.000273154	0.00605018	0.00475125	MUC1/PSMB10/GPER1/RBBP4/CDC25C/BUB1B/BUB1/NDC80/DTL/TTK/CENPF/CDK2AP2/RAD51/TRIP13/AURKB/NEK2/CDK1/E2F7/FANCI/MTBP/PTTG1/SMC3/BCL6/MSH2/E2F1/BLM/CCNB1/RRM2/GTSE1/NPM1/FBXO5/RAD21/BABAM2/FBXO43/TOPBP1/NACC2/CNOT9/MAD2L1/PSMB9/CDK2/EZH2/PPP2R5B/GADD45A/PLK1/AURKA/KLF4/CENPJ/PRKDC/TOM1L2/TICRR/CDC7/BTG2/PKD2/JADE1/CDT1/LIF/DUSP1/BRCA1/CHMP2A/TOM1L1/TAOK3/HMGA2/ESPL1/CBX3/PSMB8/CHEK1/E2F8/DONSON/PCBP…	116
BP	GO:0008202	steroid metabolic process	101/4196	344/19623	0.000277237	0.00611936	0.00480557	TFCP2L1/MVK/APOL1/ACAT1/ACAA1/ATP1A1/PRKAG2/AKR1C1/HSD3B7/COMT/ACADVL/PPARGC1A/HSD11B2/VDR/HSD17B8/SCD/CYP4V2/IGFBP7/TSPO/OSBPL3/FGF1/AMACR/EPHX2/SIRT1/PRKAA2/OSBP/NR1D1/DHRS11/APOL2/KPNB1/SCARF1/OSBPL6/APP/SPP1/CAT/ACAA2/AKR1B1/GBA2/PBX1/CYB5R3/LEPR/HINT2/ABCG1/RAN/LDLRAP1/AKR1C2/SCP2/SLC27A2/EGR1/ATP8B1/LRP2/CYP39A1/BMP6/OSBPL5/FDX1/FGFR1/ACACB/DISP3/SULT4A1/STAR/WWOX/PMVK/NFKB1/CYP27A1/AKR1C3/…	101
BP	GO:0097327	response to antineoplastic agent	38/4196	104/19623	0.000279094	0.00613911	0.00482109	EDN1/ZC3H12A/ICAM1/AQP1/HNRNPA1/MAPK13/RAD51/PDGFB/TGFB1/BLM/RECQL5/CFLAR/BRCA1/NUCB1/CBX3/PTGR1/JUP/TIMELESS/CDH1/ERRFI1/CTNNB1/DHFR/TFAP4/EGR1/FECH/PCNA/CLDN1/STAR/CDK4/DDX11/GBA/PTAFR/DNMT3B/ASNS/NR3C1/EGFR/DDIT4/RPL18A	38
BP	GO:0060706	cell differentiation involved in embryonic placenta development	14/4196	26/19623	0.000281851	0.00617845	0.00485198	PLK4/E2F7/SOCS3/ST14/LIF/E2F8/CASP8/NR2F2/KRT19/KRT8/SPINT2/FZD5/SNAI1/MDFI	14
BP	GO:0051170	import into nucleus	59/4196	181/19623	0.000287916	0.00627455	0.00492745	PDE2A/ZC3H12A/LRRK2/SIX2/HNRNPA1/KPNA2/STAT3/BCL3/IPO5/CDK1/HTATIP2/BCL6/TNPO1/KPNA3/TGFB1/PTGS2/NFKBIA/SNRPD1/RANBP1/NUP107/SIRT1/HYAL2/GAS6/PARP10/RAE1/NUP58/KPNB1/ECT2/FGF9/KPNA4/CSE1L/NUP155/IPO9/CHP1/JUP/NUP153/RAN/HSP90AB1/BACH2/ARNTL/GEMIN5/NUP133/MDFIC/TMEM173/SNRPE/GLI3/AKR1C3/TXNIP/SNRPF/CBLB/POLA2/OPRD1/SMN1/SNRPB/PRKCD/TPR/RANBP17/POM121C/NUP62CL	59
BP	GO:0034404	nucleobase-containing small molecule biosynthetic process	69/4196	219/19623	0.000288203	0.00627455	0.00492745	RAPGEF3/PDE2A/OGDHL/UPP1/PDE8B/PFKFB3/PRKAG2/PDE1A/NUDT7/PPARGC1A/STAT3/ESRRB/ADA2/PDE7A/NEIL1/PPARA/PDE4A/GMPS/NUP107/BPGM/PNP/PRKAA2/RAE1/NUP58/CNP/PDE7B/NUP160/NUP205/CTPS2/TK2/NUP155/GALK1/NDC1/NUP153/OGDH/CDA/TDG/NME3/DHFR2/NME5/NUP133/UCK2/HIF1A/MTAP/HK2/DNPH1/PFKL/ENTPD5/TYMP/CTPS1/CMPK1/NUDT4/GCK/PFKFB2/NME1/CAD/HKDC1/PRTFDC1/ENO1/ALDOA/NUDT11/TPR/APRT/PFKP/POM121C/NUP210/DDIT4/PDE10A/ENP…	69
BP	GO:0009156	ribonucleoside monophosphate biosynthetic process	60/4196	185/19623	0.000298938	0.00648614	0.00509361	OGDHL/CHCHD10/UPP1/TCIRG1/PFKFB3/PRKAG2/ATP5S/PPARGC1A/STAT3/ESRRB/PARP1/TGFB1/PPARA/GMPS/ATP8/NUP107/BPGM/ATP6/PRKAA2/RAE1/NUP58/NUP160/PRPS2/NUP205/NUP155/ATIC/GALK1/NDC1/ATP5F1D/VPS9D1/NUP153/OGDH/PINK1/NUP133/UCK2/HIF1A/PPAT/SURF1/HK2/ATP5MC1/PFKL/ENTPD5/PAICS/CMPK1/ATP5PD/GCK/PFKFB2/CAD/CYC1/HKDC1/PRTFDC1/ENO1/ALDOA/TPR/APRT/PFKP/POM121C/COX5B/NUP210/DDIT4	60
BP	GO:0046320	regulation of fatty acid oxidation	15/4196	29/19623	0.000306488	0.00659678	0.0051805	PRKAG2/PPARG/FABP3/ACADVL/PPARGC1A/CPT1A/PPARA/NR4A3/MLYCD/ETFBKMT/PDK4/ACACB/DGAT2/PPARGC1B/CNR1	15
BP	GO:0071634	regulation of transforming growth factor beta production	15/4196	29/19623	0.000306488	0.00659678	0.0051805	CX3CL1/MYB/PTGS2/FURIN/LGALS9/LAPTM4B/ATP6AP2/HSP90AB1/CD46/HIF1A/THBS1/CD2AP/CD34/CD24/WNT11	15
BP	GO:0071496	cellular response to external stimulus	96/4196	325/19623	0.000307357	0.00659678	0.0051805	PDE2A/AQP3/PIEZO1/TRPM4/NUAK2/ZC3H12A/TLR5/IRF1/ITGA2/LRRK2/TLR3/ICAM1/UPP1/ATP1A1/CPEB4/NR4A2/AQP1/CD40/SKP2/PPARG/HNRNPA1/COMT/BRIP1/MMP7/GABARAPL1/VDR/KIF26A/GAS2L1/ADNP/TGFB1/PTGS2/ENG/GSDMD/MAPK3/NFE2L2/SIRT1/GADD45A/PRKAA2/LYN/AIFM1/MAP1LC3A/HABP4/GAS6/ATF3/TMEM150C/KLF10/SIPA1/ATP2B1/FOS/HFE/FYN/CHEK1/CASP8AP2/PDK4/CASP8/CASP1/GSTP1/CASTOR1/MAP3K5/BMP6/WRN/FADS1/RIPOR1/NFKB1/AKR1C3/LTBR/CR…	96
BP	GO:0044706	multi-multicellular organism process	72/4196	231/19623	0.000308174	0.00659678	0.0051805	EDN1/TFCP2L1/ITGA2/COMT/JUNB/MAFF/MMP7/SP3/PAPPA/HSD11B2/VDR/FOSB/IGFBP7/LNPEP/B4GALT1/TGFB1/ACVR1B/PTGS2/VMP1/TGFBR2/APOL2/LGALS9/LIF/ACSL4/ADRA2C/FOS/SPP1/HFE/AKR1B1/TRO/EPN1/AGO2/EPOR/NR2F2/BYSL/ARNTL/ITGA3/CLDN4/RAMP2/PPAT/PNOC/NAMPT/STC2/PCSK5/THBD/ARID1A/STC1/GJA1/CTSV/CST3/PLA2G6/ARHGDIB/DKKL1/HPGD/PPARD/PTAFR/AR/NRK/CAD/SH3PXD2B/ADM/ABCC8/PAM/PGF/RECK/RPL29/IGFBP5/SLC2A1/UCP2/CALCA/CNR1/P…	72
BP	GO:2000756	regulation of peptidyl-lysine acetylation	25/4196	60/19623	0.000309344	0.00659969	0.00518278	MUC1/GATA2/GATA3/HDAC2/PPARGC1A/ARRB1/TGFB1/MAPK3/SIRT1/WBP2/SET/KLF15/LIF/BRCA1/CHEK1/TADA2B/HINT2/RPS6KA4/SMARCB1/AUTS2/SOX4/SPI1/PAXIP1/SNCA/SNAI2	25
BP	GO:0032091	negative regulation of protein binding	37/4196	101/19623	0.00031428	0.00668265	0.00524793	LRRK2/STMN1/AURKB/PDGFB/ADNP/PPARA/GTSE1/SLPI/MAPK3/AURKA/DNAJB2/CTSZ/IFIT2/KDM1A/HFE/TMBIM6/LRPAP1/TDG/CCM2L/CSNK1E/NFATC4/TMC8/ADAM15/ITGB1BP1/ZFPM1/DDX11/CARD16/DAB2/B2M/ID1/IFIT1/MET/PRKCD/RIPOR2/LEF1/GPSM1/SORL1	37
BP	GO:2000758	positive regulation of peptidyl-lysine acetylation	16/4196	32/19623	0.000320849	0.00679966	0.00533982	MUC1/GATA3/PPARGC1A/ARRB1/TGFB1/MAPK3/WBP2/LIF/BRCA1/TADA2B/RPS6KA4/SMARCB1/AUTS2/SOX4/PAXIP1/SNAI2	16
BP	GO:0000302	response to reactive oxygen species	75/4196	243/19623	0.00032583	0.00686395	0.00539031	HYAL1/EDN1/PTK2B/NOS3/SOD2/LRRK2/KLF2/IL18BP/HDAC2/AQP1/MAPK13/PPARGC1A/CRYAB/MYB/SOD3/CDK1/CCNA2/DNM2/NR4A3/CFLAR/MAPK3/NFE2L2/CDK2/EZH2/SIRT1/KLF4/HYAL2/AIFM1/MAP1LC3A/ND5/PKD2/ENDOG/DUSP1/ECT2/FOS/CAT/APEX1/KPNA4/ND6/PXN/TXNRD2/SDC1/STAT6/GSTP1/NQO1/PINK1/DHFR/HBA2/RHOB/PCNA/PSAP/MAP3K5/STAR/BMP7/PRDX5/AKR1C3/TXNIP/STAT1/ANXA1/HBB/CST3/HSPH1/CASP3/CYP1B1/MET/PRKCD/TNFAIP3/KCNA5/HGF/EGFR/PYCR1/…	75
BP	GO:2001252	positive regulation of chromosome organization	58/4196	178/19623	0.000326035	0.00686395	0.00539031	MUC1/LRRK2/GATA3/HIST1H1B/HNRNPA1/PPARGC1A/ARRB1/MYB/AURKB/NEK2/DLGAP5/GNL3/BCL6/TGFB1/SLF1/CCNB1/RAD21/PRKCQ/MAPK3/TET1/SIRT1/WBP2/DNMT1/CDT1/LIF/BRCA1/KDM1A/CCT2/CCT4/ESPL1/TADA2B/CTNNB1/RIF1/H2AFY/TNKS/PINK1/TCP1/JARID2/SLF2/CCT5/CCT6A/CCT3/RPS6KA4/SMARCB1/SETDB1/AUTS2/FEN1/MTF2/DDX11/PRKD1/JDP2/DNMT3B/PAXIP1/PHF19/SREBF1/VEGFA/TPR/SNAI2	58
BP	GO:0009063	cellular amino acid catabolic process	45/4196	130/19623	0.000335922	0.00704885	0.00553551	HOGA1/NOS3/ACAT1/ARG2/ADHFE1/HNMT/HMGCL/SHMT1/ACADSB/ALDH4A1/HIBADH/AUH/GOT1/DDAH1/ASRGL1/GLS/CDO1/PPM1K/GLUD1/MCCC2/GLDC/SDSL/HYKK/PHYKPL/ALDH6A1/ENOSF1/OGDH/SLC25A21/BCKDK/PPAT/AADAT/GOT2/AFMID/AHCY/PCBD1/GAD2/BCKDHA/IL4I1/HAAO/SDS/AMT/ABAT/GAD1/CRYM/GSTZ1	45
BP	GO:0006090	pyruvate metabolic process	48/4196	141/19623	0.000337831	0.0070656	0.00554867	HOGA1/OGDHL/SLC16A1/PFKFB3/PRKAG2/MPC1/PPARGC1A/STAT3/ESRRB/PDHA1/ME3/PPARA/NR4A3/NUP107/BPGM/PRKAA2/RAE1/NUP58/NUP160/NUP205/HAGH/NUP155/GALK1/MPC2/NDC1/NUP153/PDK4/OGDH/PDP1/NUP133/HIF1A/PDP2/HK2/PFKL/ENTPD5/SLC16A3/GCK/PFKFB2/HKDC1/ENO1/ALDOA/ME1/TPR/SDS/PFKP/POM121C/NUP210/DDIT4	48
BP	GO:0090100	positive regulation of transmembrane receptor protein serine/threonine kinase signaling pathway	40/4196	112/19623	0.000338936	0.0070656	0.00554867	GDF15/SOX11/TTK/FBXL15/GDF1/PARP1/TGFB1/ACVR1B/RBPMS/ENG/RBPJ/BMPR1A/FGF9/NPNT/HFE/GIPC1/ZNF423/GDF11/ACVR2B/HSP90AB1/CYR61/CITED1/BMP6/THBS1/ACVRL1/BMP7/NEO1/SDCBP/GDF10/DAB2/ITGA8/FKBP8/RNF165/TGFBR3/GDF7/UBE2O/GATA4/CRB2/FOXD1/BMP8B	40
BP	GO:1901653	cellular response to peptide	111/4196	386/19623	0.000343164	0.00713043	0.00559957	CEACAM1/KL/EDN1/ATP6V1B1/CPEB2/CA2/ESRRA/CISH/KLF2/IGF2/ATP6V1C2/TCIRG1/NR4A2/GPER1/NR4A1/CDC6/PPARG/BRIP1/GRB14/STAT3/KLF5/INPP5K/CASP4/ATP6V1A/CCNA2/SOCS3/PARP1/LMBRD1/TGFB1/GOT1/SMARCC1/TBC1D4/NR4A3/PRKCQ/CFLAR/MAPK3/NFE2L2/STAT5A/MYO1C/SIRT1/ATP6V1E1/KLF4/PRKDC/CDC5L/LEPROT/LYN/SOCS1/ATP6V0C/KLF10/ATP6V1D/ATP6V0E1/APP/CAV2/ATP6AP1/APEX1/PHIP/PXN/FYN/NUCKS1/VAMP2/AKR1B1/TIMELESS/PTPRE/ERRFI1/P…	111
BP	GO:0006919	activation of cysteine-type endopeptidase activity involved in apoptotic process	38/4196	105/19623	0.000348292	0.00721349	0.0056648	CTSH/CASP10/ROBO1/TRADD/TNFSF10/PPARG/LCK/CASP4/CFLAR/AIFM1/ANP32B/MUL1/BOK/F3/SENP1/HSPD1/CASP8AP2/CASP8/CASP1/NLRP1/IFI27/IFI27L2/CASP7/TNFSF15/CRADD/NGFR/CASP3/NOD1/CASP2/TNFRSF10B/EGLN3/CYCS/FAM162A/PYCARD/ACER2/APAF1/MAPT/SNCA	38
BP	GO:0010595	positive regulation of endothelial cell migration	41/4196	116/19623	0.000369403	0.00762596	0.00598872	EDN1/TEK/PTK2B/ZC3H12A/NOS3/GATA3/CD40/PDGFB/HMGB1/TGFB1/CIB1/PTGS2/FGF1/NFE2L2/STAT5A/SIRT1/ANXA3/MAP2K3/RHOB/SASH1/HIF1A/BCAR1/THBS1/FGFR1/FLT4/PLCG1/AMOTL1/ITGB1BP1/SRPX2/KDR/ANXA1/ATOH8/RHOJ/PRKD1/MET/HSPB1/FOXC2/VEGFA/NRP2/GPLD1/AKT3	41
BP	GO:0018212	peptidyl-tyrosine modification	117/4196	411/19623	0.00037143	0.00763142	0.00599301	FRK/TEK/PTK2B/ZFYVE28/MVP/ICAM1/CTF1/IGF2/HDAC2/EHD4/CD40/GPRC5A/HBEGF/KITLG/MELK/TTK/TMEM102/STAT3/TPST2/PDGFB/FGFR3/LCK/GPRC5B/TNK1/ADNP/SOCS3/TGFB1/CLCF1/FGF1/FGF8/TIE1/MAPK3/PPP2R5B/STAT5A/PKDCC/HYAL2/LYN/CD81/GAS6/SOCS1/ABI2/IL3RA/LIF/FGF9/ADRA2C/CD74/APP/EPHA1/BTC/DMTN/FYN/DYRK2/ROR2/MAP2K3/FES/ERRFI1/ZMYM2/MAP2K6/ENPP2/EFNA1/SAMSN1/ERBB2/ERBB3/TPST1/STAP2/AFAP1L2/ADRA2A/FGFR1/FLT4/SEMA4D/F…	117
BP	GO:0018242	protein O-linked glycosylation via serine	12/4196	21/19623	0.000373482	0.00763142	0.00599301	GALNT14/GALNT15/GALNT3/GALNT18/GALNT6/GALNT1/KCNA6/GALNT12/GALNT11/GALNT17/GALNT7/GALNT13	12
BP	GO:0007269	neurotransmitter secretion	50/4196	149/19623	0.000378299	0.00763142	0.00599301	NAAA/LRRK2/PRKN/SYTL4/GPER1/KCNC4/GRM4/SLC32A1/STX4/NAPA/PNKD/SYNJ1/TC2N/LIN7A/VAMP2/SLC30A1/SNCG/BLOC1S6/SYT17/SYT7/NRXN2/CACNA1B/SYT13/NRXN1/CPLX1/RIMS4/CADPS2/ASIC1/RIMS1/GAD2/CHRNA3/APBA1/SNAP25/STX3/RAB3A/PRRT2/MCTP1/CHRNB4/C2CD4B/PPFIA4/GAD1/SYTL3/SYT6/SYT11/BRSK1/SNCA/SYT14/PTPRN2/SYTL2/PCLO	50
BP	GO:0099643	signal release from synapse	50/4196	149/19623	0.000378299	0.00763142	0.00599301	NAAA/LRRK2/PRKN/SYTL4/GPER1/KCNC4/GRM4/SLC32A1/STX4/NAPA/PNKD/SYNJ1/TC2N/LIN7A/VAMP2/SLC30A1/SNCG/BLOC1S6/SYT17/SYT7/NRXN2/CACNA1B/SYT13/NRXN1/CPLX1/RIMS4/CADPS2/ASIC1/RIMS1/GAD2/CHRNA3/APBA1/SNAP25/STX3/RAB3A/PRRT2/MCTP1/CHRNB4/C2CD4B/PPFIA4/GAD1/SYTL3/SYT6/SYT11/BRSK1/SNCA/SYT14/PTPRN2/SYTL2/PCLO	50
BP	GO:0035384	thioester biosynthetic process	26/4196	64/19623	0.000381641	0.00763142	0.00599301	ACSL1/ACSL5/ACSS1/ELOVL7/ACAT1/MPC1/ELOVL1/ELOVL2/HSD17B8/SCD/PDHA1/MLYCD/SLC25A1/ACSL4/MPC2/ELOVL5/PDK4/PDP1/ACACB/SCD5/PDP2/ACSF3/ACSS2/HACD1/FASN/SNCA	26
BP	GO:0071616	acyl-CoA biosynthetic process	26/4196	64/19623	0.000381641	0.00763142	0.00599301	ACSL1/ACSL5/ACSS1/ELOVL7/ACAT1/MPC1/ELOVL1/ELOVL2/HSD17B8/SCD/PDHA1/MLYCD/SLC25A1/ACSL4/MPC2/ELOVL5/PDK4/PDP1/ACACB/SCD5/PDP2/ACSF3/ACSS2/HACD1/FASN/SNCA	26
BP	GO:0006273	lagging strand elongation	8/4196	11/19623	0.000382343	0.00763142	0.00599301	PARP3/PARP1/DNA2/RNASEH2A/POLA1/FEN1/LIG1/LIG3	8
BP	GO:0032957	inositol trisphosphate metabolic process	8/4196	11/19623	0.000382343	0.00763142	0.00599301	PTK2B/GPER1/ITPK1/PLCG2/PTAFR/HRH1/P2RY1/ITPKB	8
BP	GO:0051124	synaptic growth at neuromuscular junction	8/4196	11/19623	0.000382343	0.00763142	0.00599301	SIX1/SHANK2/APP/SIX4/AGRN/SHANK3/LRP4/COLQ	8
BP	GO:0072697	protein localization to cell cortex	8/4196	11/19623	0.000382343	0.00763142	0.00599301	ANLN/EZR/RTKN2/SAPCD2/RTKN/GPSM2/GNAI1/EPB41	8
BP	GO:1901570	fatty acid derivative biosynthetic process	39/4196	109/19623	0.000382827	0.00763142	0.00599301	ACSL1/EDN1/ACSL5/ELOVL7/GGT1/ACAT1/PTGS1/CBR1/GGT5/ELOVL1/HMGCL/ELOVL2/HSD17B8/SCD/PTGS2/SIRT1/SLC25A1/ACSL4/PTGES/CD74/BDH1/ELOVL5/FAM213B/PLA2G4A/ALOX5AP/ACSS3/SCD5/FADS1/AKR1C3/SLC27A5/BDH2/ACSF3/MGST2/ANXA1/MGST3/HPGD/HACD1/FASN/ALOX5	39
BP	GO:0030324	lung development	59/4196	183/19623	0.000396844	0.00786438	0.00617596	CTSH/NOS3/SOX11/FSTL3/THRB/KLF2/EPAS1/ESRP2/SP3/FGF1/FGF8/MAPK3/PKDCC/TGFBR2/CTSZ/RBPJ/MYCN/BMPR1A/LIF/FGF9/ADAMTSL2/FOXJ1/THRA/HS6ST1/PTK7/TIMELESS/ACVR2B/ERRFI1/DNAAF1/CTNNB1/VANGL2/LOXL3/HEG1/ITGA3/CRISPLD2/PDPN/FGFR1/FLT4/GLI3/PHF14/LAMA5/PDGFA/TNS3/ID1/CELSR1/RIDA/HHEX/CTGF/SREBF1/RAB3A/VEGFA/LOX/NFIB/WNT11/EGFR/ABCA12/IGFBP5/STRA6/DLG5	59
BP	GO:0072395	signal transduction involved in cell cycle checkpoint	33/4196	88/19623	0.000397743	0.00786438	0.00617596	MUC1/SOX11/CDC25C/DTL/CDK1/E2F7/E2F1/CCNB1/GTSE1/NPM1/BABAM2/CNOT9/CDK2/GADD45A/PLK1/AURKA/CENPJ/PRKDC/CDC5L/BTG2/BRCA1/CHEK1/E2F8/PCBP4/CHEK2/CNOT6/PCNA/RGCC/CRADD/SOX4/UBC/CASP2/TNKS1BP1	33
BP	GO:1904375	regulation of protein localization to cell periphery	35/4196	95/19623	0.000398212	0.00786438	0.00617596	PRKCH/BCL2L1/GPER1/ARHGEF16/SQSTM1/TGFB1/CIB1/STX4/EZR/PKDCC/PLS1/VAMP8/SAPCD2/PPP2R5A/LYPD1/TMBIM1/RER1/LDLRAP1/PICALM/TMEM59/ITGA3/CLIP3/DAB2/GPSM2/AKAP5/AR/GNAI1/EPB41/STX3/GBP1/EGFR/WNK3/PRNP/DPP10/EPHA3	35
BP	GO:0044242	cellular lipid catabolic process	71/4196	229/19623	0.00040031	0.00788142	0.00618933	FUCA1/ACADS/ACAT1/ACAA1/ETFDH/LPL/MGLL/FABP3/NUDT7/ACADVL/PCCA/HADHB/ABHD12/PNPLA2/CPT1A/PPARA/AUH/AMACR/MLYCD/LPIN3/PLA2G15/FAAH/PECR/DECR1/ETFBKMT/SMPD1/ACAA2/SLC27A4/NEU1/GBA2/ETFB/PLCG2/PHYH/PNPLA6/ECH1/ENPP2/SCP2/SLC27A2/MCEE/PLA2G4A/PEX7/ACACB/ACBD5/PLCG1/CRAT/CROT/AKR1C3/ECI1/BDH2/MGST2/GBA/PPARD/FABP5/CEL/CYP1B1/GLYATL2/LIPG/SMPD4/ECHDC2/PRKCD/APOC1/CYP26A1/SIRT2/GPLD1/INPP5F/NEU4/PNPLA4/…	71
BP	GO:0030323	respiratory tube development	60/4196	187/19623	0.000410077	0.00798697	0.00627223	CTSH/NOS3/SOX11/FSTL3/THRB/KLF2/EPAS1/ESRP2/SP3/FGF1/FGF8/MAPK3/PKDCC/TGFBR2/CTSZ/RBPJ/MYCN/BMPR1A/LIF/FGF9/ADAMTSL2/FOXJ1/THRA/HS6ST1/PTK7/TIMELESS/ACVR2B/ERRFI1/DNAAF1/CTNNB1/VANGL2/LOXL3/HEG1/ITGA3/CRISPLD2/PDPN/FGFR1/FLT4/GLI3/PHF14/LAMA5/PCSK5/PDGFA/TNS3/ID1/CELSR1/RIDA/HHEX/CTGF/SREBF1/RAB3A/VEGFA/LOX/NFIB/WNT11/EGFR/ABCA12/IGFBP5/STRA6/DLG5	60
BP	GO:1901983	regulation of protein acetylation	28/4196	71/19623	0.000414532	0.00798697	0.00627223	MUC1/RAPGEF3/GATA2/GATA3/HDAC2/PPARGC1A/ARRB1/TGFB1/MAPK3/SIRT1/WBP2/SET/KLF15/LIF/BRCA1/CHEK1/TADA2B/HINT2/ARNTL/FAM161A/RPS6KA4/SMARCB1/AUTS2/SOX4/SPI1/PAXIP1/SNCA/SNAI2	28
BP	GO:0006333	chromatin assembly or disassembly	66/4196	210/19623	0.000415857	0.00798697	0.00627223	HIST1H1B/NAP1L1/PADI2/HJURP/RBBP4/CENPA/CENPI/HIST1H2BM/MCM2/H2AFY2/KNL1/OIP5/HIST1H1C/CENPH/HMGB2/HIST1H2BF/SUV39H2/NPM1/SMARCC1/CENPU/CENPP/ASF1B/ARID2/SMARCE1/HELLS/PBRM1/MIS18BP1/CENPM/SET/HIST3H2BB/PARP10/ANP32B/CENPK/CENPL/HMGA2/H2AFX/NAA60/CENPO/H3F3A/KAT6B/NASP/H2AFY/CHAF1A/HIST1H2BH/SUPT16H/CENPV/CENPQ/MIS18A/CENPW/SMARCD1/SMARCA5/SMARCB1/HIST3H2A/BAZ1B/ARID1A/CENPN/CHAF1B/ANP32E/HIST1H4…	66
BP	GO:0001974	blood vessel remodeling	21/4196	48/19623	0.000417408	0.00798697	0.00627223	CEACAM1/NOS3/TGM2/EPAS1/TGFB1/FGF8/ERG/RBPJ/LIF/CHD7/ACVR2B/TMBIM1/FLT4/ACVRL1/SEMA3C/NOL3/CST3/BGN/FOXC2/BCR/DLL4	21
BP	GO:0071774	response to fibroblast growth factor	52/4196	157/19623	0.000417636	0.00798697	0.00627223	HYAL1/KL/GATA3/GALNT3/NR4A1/ESRP2/HNRNPA1/FGFR3/SHISA2/POLR2D/ZFP36/FGF1/FGF8/MAPK3/SPRED1/IER2/CDC5L/HYAL2/CCL2/FGF9/TIA1/TRIM71/RBFOX2/HNRNPH1/PTBP1/KDM5B/KIF16B/CTNNB1/FAM20C/KCNC1/NCBP1/ZFP36L2/NPTN/THBS1/SPRED2/FGFR1/STAR/ITGB1BP1/EGR3/IQGAP1/UBC/FLRT1/FGF17/CCL5/FGFR4/CTGF/ESRP1/CD44/DLL4/SNCA/POSTN/SNAI2	52
BP	GO:2000278	regulation of DNA biosynthetic process	40/4196	113/19623	0.000417689	0.00798697	0.00627223	PTK2B/PPARG/HNRNPA1/DACH1/AURKB/PDGFB/NEK2/PIF1/GDF1/FAM129B/PRKCQ/DSCC1/MAPK3/KLF4/DUSP1/CCT2/RFC4/CCT4/RFC3/RFC2/CTNNB1/TNKS/HSP90AB1/DCP2/TCP1/CCT5/CCT6A/RFC5/CCT3/ACVRL1/KCNK2/NVL/CHTF18/RGCC/GJA1/FGFR4/HGF/GREM1/PAK3/PARM1	40
BP	GO:0045862	positive regulation of proteolysis	114/4196	400/19623	0.00041784	0.00798697	0.00627223	MELTF/CTSH/PTK2B/CASP10/ZC3H12A/RNF144B/LRRK2/ROBO1/TRADD/TNFSF10/PRKN/HDAC2/GPER1/PPARG/TBC1D10A/ARRB1/HPN/STAT3/CYFIP2/LCK/CASP4/HMGB1/HERPUD1/ANTXR1/CFLAR/FURIN/MAPK3/NFE2L2/SIRT1/DDRGK1/PLK1/AURKA/EDEM2/TNIP1/LYN/AIFM1/LGALS9/ANP32B/MUL1/BOK/APP/F3/MBP/FYN/SENP1/ECSCR/RNF138/NEK5/HSPD1/CASP8AP2/CASP8/CASP1/PINK1/PICALM/TFAP4/EFNA1/CLU/NLRP1/MAP3K5/COP1/CSNK1E/CYR61/IFI27/TNFRSF1B/UBE2V2/ADRA2…	114
BP	GO:0009127	purine nucleoside monophosphate biosynthetic process	56/4196	172/19623	0.000418192	0.00798697	0.00627223	OGDHL/CHCHD10/TCIRG1/PFKFB3/PRKAG2/ATP5S/PPARGC1A/STAT3/ESRRB/PARP1/TGFB1/PPARA/GMPS/ATP8/NUP107/BPGM/ATP6/PRKAA2/RAE1/NUP58/NUP160/PRPS2/NUP205/NUP155/ATIC/GALK1/NDC1/ATP5F1D/VPS9D1/NUP153/OGDH/PINK1/NUP133/HIF1A/PPAT/SURF1/HK2/ATP5MC1/PFKL/ENTPD5/PAICS/ATP5PD/GCK/PFKFB2/CYC1/HKDC1/PRTFDC1/ENO1/ALDOA/TPR/APRT/PFKP/POM121C/COX5B/NUP210/DDIT4	56
BP	GO:0009168	purine ribonucleoside monophosphate biosynthetic process	56/4196	172/19623	0.000418192	0.00798697	0.00627223	OGDHL/CHCHD10/TCIRG1/PFKFB3/PRKAG2/ATP5S/PPARGC1A/STAT3/ESRRB/PARP1/TGFB1/PPARA/GMPS/ATP8/NUP107/BPGM/ATP6/PRKAA2/RAE1/NUP58/NUP160/PRPS2/NUP205/NUP155/ATIC/GALK1/NDC1/ATP5F1D/VPS9D1/NUP153/OGDH/PINK1/NUP133/HIF1A/PPAT/SURF1/HK2/ATP5MC1/PFKL/ENTPD5/PAICS/ATP5PD/GCK/PFKFB2/CYC1/HKDC1/PRTFDC1/ENO1/ALDOA/TPR/APRT/PFKP/POM121C/COX5B/NUP210/DDIT4	56
BP	GO:0031345	negative regulation of cell projection organization	56/4196	172/19623	0.000418192	0.00798697	0.00627223	RAP1GAP/INPP5J/LRRK2/SEMA4A/HDAC2/TRPV4/CIB1/MAP4K4/DNM2/SEMA3G/CDK5R1/RAP1GAP2/CTSZ/TBX6/RTN4/SPP1/RAB29/FYN/SEMA3B/TBC1D30/RGMA/ASAP1/DRAXIN/EVL/EFNA1/ITGA3/DNM3/KLK8/RTN4R/NFATC4/SEMA4D/SLIT2/CEP97/THY1/PTPRG/NR2F1/ITM2C/ARHGAP4/SEMA3C/LRP4/DPYSL3/PMP22/B2M/NGFR/EFNB3/ID1/DCC/CCL21/SEMA3A/LINGO1/PRKCD/GRIN2B/INPP5F/DAB1/PRNP/NGEF	56
BP	GO:0030214	hyaluronan catabolic process	10/4196	16/19623	0.000438223	0.00834454	0.00655303	HYAL1/HEXA/HMMR/TGFB1/HYAL2/CHP1/CEMIP2/SLC9A1/LYVE1/CD44	10
BP	GO:0007565	female pregnancy	63/4196	199/19623	0.0004473	0.008454	0.00663898	TFCP2L1/ITGA2/COMT/JUNB/MMP7/SP3/PAPPA/HSD11B2/VDR/FOSB/IGFBP7/LNPEP/TGFB1/ACVR1B/PTGS2/VMP1/TGFBR2/APOL2/LGALS9/LIF/ACSL4/ADRA2C/FOS/SPP1/HFE/AKR1B1/TRO/EPN1/AGO2/EPOR/NR2F2/BYSL/ITGA3/CLDN4/RAMP2/PPAT/PNOC/NAMPT/STC2/PCSK5/THBD/ARID1A/STC1/GJA1/CTSV/CST3/PLA2G6/ARHGDIB/HPGD/PPARD/AR/CAD/ADM/ABCC8/PAM/PGF/RECK/RPL29/IGFBP5/SLC2A1/UCP2/CALCA/CNR1	63
BP	GO:1903578	regulation of ATP metabolic process	34/4196	92/19623	0.000448042	0.008454	0.00663898	PFKFB3/PRKAG2/PPARGC1A/STAT3/ESRRB/CDK1/PARP1/PPARA/TSPO/CCNB1/NUP107/PRKAA2/RAE1/NUP58/NUP160/NUP205/NUP155/NDC1/NUP153/PINK1/NUP133/BEND3/HIF1A/ENTPD5/SLC25A23/GCK/ATP5IF1/PFKFB2/ENO1/TPR/POM121C/NUP210/SNCA/DDIT4	34
BP	GO:0097237	cellular response to toxic substance	79/4196	261/19623	0.000448555	0.008454	0.00663898	ZC3H12A/NOS3/SOD2/LRRK2/KLF2/PRKN/IL18BP/HDAC2/PTGS1/GSTM3/AQP1/HNRNPA1/MAPK13/PPARGC1A/GSTK1/MYB/RAD51/SOD3/PDGFB/PXDN/GDF1/CDK1/DNM2/PTGS2/NR4A3/DNMT3A/NFE2L2/EZH2/SIRT1/KLF4/AIFM1/MAP1LC3A/GPX3/ENDOG/ECT2/CAT/APEX1/TIMELESS/TXNRD2/STAT6/GSTP1/NQO1/PINK1/DHFR/HBA2/EGR1/FAM213B/IPCEF1/RHOB/PCNA/PSAP/MAP3K5/GPX8/BMP7/PRDX5/NFKB1/DDX11/CLIC2/KDR/MGST2/ANXA1/SPI1/HBB/CST3/OPRD1/HSPH1/MGST3/TP53INP1…	79
BP	GO:0008360	regulation of cell shape	58/4196	180/19623	0.000449272	0.008454	0.00663898	PTK2B/FGD3/SEMA4A/ICAM1/HPN/PALMD/PRPF40A/RHOD/ANXA7/ARHGAP18/FGD4/PLEKHO1/ATP10A/EZR/WASF3/CDC7/CCL2/PHIP/DMTN/FYN/RHOBTB1/FES/C21orf2/FGD5/RHOB/STRIP2/CSNK1E/RHOC/MYH14/CDC42EP2/PDPN/WDR1/FGD1/SEMA4D/VRK1/BRWD3/KDR/CDC42EP1/ANXA1/MYL12B/RHOJ/MYH9/SH3KBP1/C15orf62/RHOV/COCH/EPB41/MSN/RHOF/ARAP3/RHOU/PLXNB1/ALDOA/VEGFA/FBLIM1/PALM/ARHGAP15/SYNE3	58
BP	GO:0044344	cellular response to fibroblast growth factor stimulus	50/4196	150/19623	0.000451214	0.00846556	0.00664807	HYAL1/KL/GATA3/GALNT3/NR4A1/ESRP2/HNRNPA1/FGFR3/SHISA2/POLR2D/ZFP36/FGF1/FGF8/MAPK3/SPRED1/CDC5L/HYAL2/CCL2/FGF9/TIA1/TRIM71/RBFOX2/HNRNPH1/PTBP1/KDM5B/KIF16B/CTNNB1/FAM20C/NCBP1/ZFP36L2/NPTN/THBS1/SPRED2/FGFR1/STAR/ITGB1BP1/EGR3/IQGAP1/UBC/FLRT1/FGF17/CCL5/FGFR4/CTGF/ESRP1/CD44/DLL4/SNCA/POSTN/SNAI2	50
BP	GO:0045995	regulation of embryonic development	44/4196	128/19623	0.000461163	0.00862685	0.00677473	GATA2/FZD7/GATA3/PHLDA2/HNF1B/SIX1/SOX17/LAMA4/TGIF2/RACGAP1/CDK1/FZD3/FAM129B/TBX2/NFE2L2/RNF207/KLF4/FZD2/BMPR1A/RPS6KA6/MBP/SIX4/PTK7/CTNNB1/VANGL2/GPR161/TENM4/DMRT2/FGFR1/LAMA5/BMP7/STOX1/PHLDB1/CCSAP/OSR1/AR/NRK/CELSR1/GDNF/SNAI1/GORAB/LAMA1/CRB2/SCX	44
BP	GO:0051961	negative regulation of nervous system development	86/4196	289/19623	0.00047391	0.00883938	0.00694163	INPP5J/SOX11/LRRK2/SEMA4A/HDAC2/TRPV4/STAT3/ASPM/TGFB1/CIB1/MAP4K4/TSPO/SEMA3G/ADGRG1/ARHGEF15/MIB1/CHRD/CDK5R1/RAP1GAP2/CTSZ/TBX6/MYCN/BMPR1A/DLL3/RTN4/MEIS1/APP/SPP1/IDH2/RAB29/SLIT1/SEMA3B/IRX3/RGMA/PBX1/EDNRB/CTNNB1/ASAP1/DRAXIN/ROBO2/EFNA1/GPR161/DNM3/KLK8/RTN4R/GLI3/TLR2/NFATC4/SEMA4D/DISP3/SLIT2/THY1/PTPRG/NR2F1/BMP7/TNN/ITM2C/CDK5RAP2/ARHGAP4/SEMA3C/LRP4/DPYSL3/PMP22/B2M/NGFR/EFNB3/ID1/PR…	86
BP	GO:0000018	regulation of DNA recombination	29/4196	75/19623	0.000485889	0.00903641	0.00709635	TNFSF13/CD40/MSH6/KPNA2/RAD51/POLQ/BCL6/TGFB1/MSH2/CLCF1/BLM/RECQL5/RAD51AP1/ZRANB3/PARPBP/ALYREF/KDM1A/ATAD5/NSD2/IL27RA/PPP4R2/CHEK1/STAT6/RIF1/TEX15/SMARCAD1/WRN/FIGNL1/PAXIP1	29
BP	GO:0043281	regulation of cysteine-type endopeptidase activity involved in apoptotic process	75/4196	246/19623	0.000487755	0.00904473	0.00710289	CTSH/CASP10/BIRC3/ROBO1/TRADD/TNFSF10/GPER1/AQP1/PPARG/BIRC5/ARRB1/CRYAB/LCK/CASP4/HMGB1/HERPUD1/PTGS2/CFLAR/SIRT1/KLF4/AIFM1/GAS6/LGALS9/ANP32B/MUL1/BOK/F3/SENP1/RPS6KA1/HSPD1/CASP8AP2/CASP8/CASP1/TFAP4/NLRP1/MAP3K5/CYR61/IFI27/TNFRSF1B/RNF34/THBS1/IFI27L2/CASP7/GSN/PRDX5/TNFSF15/CARD16/CASC2/CRADD/DHCR24/NOL3/RAG1/NGFR/CASP3/NOD1/TNFAIP8/CASP2/DAPK1/TNFRSF10B/FIS1/EGLN3/CYCS/TNFRSF10C/CTGF/VEGF…	75
BP	GO:0009206	purine ribonucleoside triphosphate biosynthetic process	52/4196	158/19623	0.000494923	0.00914845	0.00718434	OGDHL/CHCHD10/TCIRG1/PFKFB3/PRKAG2/ATP5S/PPARGC1A/STAT3/ESRRB/PARP1/TGFB1/PPARA/ATP8/NUP107/BPGM/ATP6/PRKAA2/RAE1/NUP58/NUP160/NUP205/NUP155/GALK1/NDC1/ATP5F1D/VPS9D1/NUP153/OGDH/PINK1/NME3/NME5/NUP133/HIF1A/SURF1/HK2/ATP5MC1/PFKL/ENTPD5/ATP5PD/GCK/PFKFB2/NME1/CYC1/HKDC1/ENO1/ALDOA/TPR/PFKP/POM121C/COX5B/NUP210/DDIT4	52
BP	GO:0032386	regulation of intracellular transport	118/4196	418/19623	0.000499207	0.00914845	0.00718434	RAPGEF3/GATA2/PDE2A/ZC3H12A/LRRK2/KHDRBS1/PRKN/SPAG5/PRR5L/HNMT/CPSF6/CRYAB/CDKL2/WWC1/PPP1CC/IPO5/INPP5K/TMEM30B/CDK1/XPO1/TGFB1/CIB1/GAS1/STOM/PTGS2/KIF20B/GTSE1/BARD1/MAPK3/MYO1C/EZR/SIRT1/EDEM2/REEP6/HYAL2/CDK5R1/PRELID3A/LEPROT/LYN/GAS6/NAPA/PARP10/NUP58/LGALS9/SAE1/ECT2/ANP32B/VAMP8/CTDSPL2/MIEF2/RAB29/NUCB1/DMTN/FYN/VAMP2/SP100/CHP1/JUP/FES/NUP153/SNX12/LDLRAP1/HSP90AB1/SCP2/PINK1/DHX9/MTC…	118
BP	GO:0008038	neuron recognition	16/4196	33/19623	0.000499879	0.00914845	0.00718434	ROBO1/ROBO3/CDK5R1/RTN4/APP/CNTNAP2/ROBO2/EPHB3/TNN/NRCAM/EFNB3/SEMA3A/PCDH12/CNTN2/CNR1/EPHA3	16
BP	GO:0010765	positive regulation of sodium ion transport	16/4196	33/19623	0.000499879	0.00914845	0.00718434	ATP1B1/GLRX/DNM2/PRSS8/CHP1/ATP1B3/WNK2/ANK3/GPD1L/CNTN1/SCN5A/ACTN4/SLC9A1/SCN1B/WNK3/PKP2	16
BP	GO:0097164	ammonium ion metabolic process	68/4196	219/19623	0.000500519	0.00914845	0.00718434	DEGS2/MAOA/SLC44A3/LPCAT2/MAOB/PRKN/RARRES3/SLC22A5/AKR1C1/NR4A2/SLC44A4/FABP3/HNMT/COMT/STARD10/CHDH/SHMT1/SGMS2/SGPP1/CLN3/ABHD4/CPT1A/PCYT1B/SLC44A2/LPIN3/SLC22A4/CDS1/SPTLC3/PLA2G15/PNKD/SMPD1/NPR1/SAT1/AKR1B1/PNPLA6/ENPP2/AKR1C2/PLA2G4A/SGMS1/PAOX/CHPT1/PLA2G16/DBI/CRAT/CROT/AKR1C3/LPCAT3/SPTLC2/GBA/PLA2G6/RNF180/PLBD1/COLQ/SMPD4/PRKCD/APOC1/MOXD1/CHKB/GPLD1/PLA2G7/ABAT/GRIN2A/ACER2/LCAT/SGP…	68
BP	GO:0019362	pyridine nucleotide metabolic process	57/4196	177/19623	0.000508667	0.00924441	0.0072597	OGDHL/RBKS/PFKFB3/PRKAG2/NMRK1/MPC1/PPARGC1A/STAT3/ESRRB/PDHA1/PPARA/PTGS2/NUP107/BPGM/PNP/PRKAA2/NAPRT/PARP10/RAE1/NUP58/NUP160/IDH2/NUP205/NUP155/GALK1/MPC2/NDC1/NUP153/NNMT/OGDH/TP53I3/NADSYN1/NMNAT3/NUP133/DCXR/HIF1A/GPD1L/NAMPT/HK2/NNT/PFKL/ENTPD5/GCK/PARP9/PFKFB2/HKDC1/ENO1/HAAO/ALDOA/ME1/TPR/PFKP/POM121C/G6PD/RNLS/NUP210/DDIT4	57
BP	GO:0046496	nicotinamide nucleotide metabolic process	57/4196	177/19623	0.000508667	0.00924441	0.0072597	OGDHL/RBKS/PFKFB3/PRKAG2/NMRK1/MPC1/PPARGC1A/STAT3/ESRRB/PDHA1/PPARA/PTGS2/NUP107/BPGM/PNP/PRKAA2/NAPRT/PARP10/RAE1/NUP58/NUP160/IDH2/NUP205/NUP155/GALK1/MPC2/NDC1/NUP153/NNMT/OGDH/TP53I3/NADSYN1/NMNAT3/NUP133/DCXR/HIF1A/GPD1L/NAMPT/HK2/NNT/PFKL/ENTPD5/GCK/PARP9/PFKFB2/HKDC1/ENO1/HAAO/ALDOA/ME1/TPR/PFKP/POM121C/G6PD/RNLS/NUP210/DDIT4	57
BP	GO:0099173	postsynapse organization	40/4196	114/19623	0.000512329	0.00928452	0.0072912	LRRK2/LZTS3/ETV5/CDH2/ARC/SHANK2/CDK5R1/FYN/CHRNA7/CTTN/RER1/CAPRIN1/TIAM1/EFNA1/ITGA3/DNM3/ABHD17B/EPHB3/NRXN2/SHANK3/ARHGAP44/LRP4/NRXN1/CHRNB1/TANC1/MAGI2/CEL/GDNF/COLQ/GRIN2B/TMEM108/FZD9/CAMK2B/PAK3/PRNP/LRP8/DLG4/NGEF/CUX2/RELN	40
BP	GO:0009144	purine nucleoside triphosphate metabolic process	101/4196	350/19623	0.000541158	0.00977917	0.00767965	OGDHL/ATP6V1B1/LRRK2/ATP1B1/CHCHD10/TCIRG1/PFKFB3/PRKAG2/ATP5S/GIMAP7/NFS1/SDHA/PPARGC1A/STAT3/ESRRB/MOCS2/CDK1/ATP6V1A/PARP1/TGFB1/PPARA/MSH2/TSPO/CCNB1/ND4/ND4L/ATP8/COQ9/NUP107/BPGM/ATP6/CYTB/PRKAA2/ND5/RAE1/NUP58/NUP160/COX1/NDUFV1/COX3/NUP205/COX2/ND6/MOCS1/ND3/ND1/NUP155/GALK1/NDUFS7/NDC1/ATP5F1D/VPS9D1/NUP153/OGDH/ND2/RAN/PINK1/NME3/FAM20C/NME5/OLA1/NUP133/BEND3/HIF1A/SDHD/SURF1/HK2/CTNS/A…	101
BP	GO:0046034	ATP metabolic process	92/4196	314/19623	0.00054385	0.00980006	0.00769606	OGDHL/ATP6V1B1/ATP1B1/CHCHD10/TCIRG1/PFKFB3/PRKAG2/ATP5S/SDHA/PPARGC1A/STAT3/ESRRB/CDK1/ATP6V1A/PARP1/TGFB1/PPARA/MSH2/TSPO/CCNB1/ND4/ND4L/ATP8/COQ9/NUP107/BPGM/ATP6/CYTB/PRKAA2/ND5/RAE1/NUP58/NUP160/COX1/NDUFV1/COX3/NUP205/COX2/ND6/ND3/ND1/NUP155/GALK1/NDUFS7/NDC1/ATP5F1D/VPS9D1/NUP153/OGDH/ND2/PINK1/FAM20C/OLA1/NUP133/BEND3/HIF1A/SDHD/SURF1/HK2/CTNS/ATP5MC1/PFKL/ENTPD5/ATP5PD/SLC25A23/NDUFC1/FI…	92
BP	GO:0008593	regulation of Notch signaling pathway	36/4196	100/19623	0.000551444	0.00990891	0.00778154	GATA2/ELF3/LLGL2/ARRB1/STAT3/BCL6/ARRDC1/NFKBIA/FAM129B/RBPJ/EGFL7/SYNJ2BP/KAT2B/TCIM/JAG2/CD46/MAML1/WWP2/ITGB1BP1/BMP7/CREBBP/IL6ST/MAML3/UBC/GALNT11/AAK1/HEY1/CHAC1/LLGL1/DLK1/CNTN6/ENHO/EGFR/DLL4/NOV/POSTN	36
CC	GO:0005819	spindle	140/4396	343/20758	8.53e-17	6.42e-14	5.1e-14	NUSAP1/CCDC69/EML2/TPX2/ANXA11/KIF20A/FAM110C/CKAP2/KIF11/SKA3/CKAP2L/SPAG5/CDC6/BUB1B/KIF15/TTK/CENPF/BIRC5/CDC20/SKA1/SPAST/KIF18B/SGO1/KIF14/HSPA2/CENPE/AURKB/FAM83D/NEK2/PRC1/RACGAP1/DLGAP5/KLHL21/KIFC1/CDCA8/PSRC1/ASPM/FRY/CDK1/KIF4A/KIF2C/SMC3/TACC3/CAPG/KIF18A/SPDL1/CCNB1/KIF20B/NPM1/FBXO5/KNSTRN/TOPBP1/HASPIN/MAD2L1/PLK1/AURKA/KIF22/RSPH1/KIF23/KNTC1/CKAP5/CEP170/CDC7/PKD2/SKA2/DCDC2/RAE1…	140
CC	GO:0000775	chromosome, centromeric region	97/4396	208/20758	1.86e-16	7.01e-14	5.57e-14	HJURP/SKA3/SPAG5/CENPA/NCAPG/BUB1B/CENPI/BUB1/NDC80/TTK/CENPF/BIRC5/SKA1/SGO1/CENPE/AURKB/NEK2/ERCC6L/KNL1/PPP1CC/CDCA8/NCAPD2/SPC25/OIP5/SPC24/XPO1/MTBP/KIF2C/SMC3/ESCO2/KIF18A/CDCA5/CENPH/ZWINT/SUV39H2/SPDL1/NUF2/CCNB1/WDHD1/KNSTRN/RAD21/CENPU/CENPP/DNMT3A/ZWILCH/DSCC1/MAD2L1/NUP107/HELLS/PLK1/AURKA/KIF22/PHF6/SGO2/KNTC1/CKAP5/MIS18BP1/CENPM/DNMT1/SKA2/CDT1/CBX1/NUP160/CENPK/CENPL/CBX3/DSN1/CEN…	97
CC	GO:0000779	condensed chromosome, centromeric region	63/4396	124/20758	2.78e-13	6.97e-11	5.53e-11	HJURP/SKA3/SPAG5/CENPA/NCAPG/BUB1B/BUB1/NDC80/CENPF/BIRC5/SKA1/SGO1/CENPE/AURKB/NEK2/ERCC6L/KNL1/PPP1CC/NCAPD2/SPC25/SPC24/KIF2C/CENPH/ZWINT/SPDL1/NUF2/CCNB1/KNSTRN/CENPU/ZWILCH/MAD2L1/NUP107/PLK1/AURKA/PHF6/SGO2/KNTC1/CKAP5/MIS18BP1/CENPM/SKA2/CDT1/CENPK/CBX3/DSN1/CENPO/BOD1/CEBPB/CENPV/SMC1A/NCAPD3/DYNLT3/NUP133/CENPW/CHAMP1/DYNC1LI1/SEPT6/CENPN/CENPB/NSL1/INCENP/ITGB3BP/SYCP2L	63
CC	GO:0000793	condensed chromosome	97/4396	233/20758	1.12e-12	2.11e-10	1.68e-10	TOP2A/HJURP/SKA3/SPAG5/CENPA/NCAPG/BUB1B/BUB1/NDC80/CENPF/BIRC5/SKA1/NCAPH/SGO1/HSPA2/RAD51/CENPE/AURKB/ESRRB/NEK2/ERCC6L/KNL1/PPP1CC/NCAPD2/SPC25/HMGB1/SPC24/KIF2C/SMC3/CDCA5/CENPH/HMGB2/ZWINT/SPDL1/BLM/NUF2/CCNB1/KNSTRN/RAD21/CENPU/TOPBP1/ZWILCH/MAD2L1/NUP107/CDK2/PLK1/SYCE2/AURKA/MKI67/PHF6/RSPH1/SGO2/SMC2/KNTC1/CKAP5/MIS18BP1/CENPM/SKA2/CDT1/FANCD2/BRCA1/SMC4/CENPK/BRCA2/H2AFX/CBX3/DSN1/CHEK1…	97
CC	GO:0098687	chromosomal region	140/4396	383/20758	2.42e-12	3.64e-10	2.89e-10	HJURP/SKA3/SPAG5/CENPA/NCAPG/BUB1B/MCM6/CENPI/BUB1/NDC80/TTK/CENPF/BIRC5/SKA1/SGO1/RAD51/CENPE/AURKB/MCM7/NEK2/PIF1/MCM2/ERCC6L/H2AFY2/KNL1/PPP1CC/CDCA8/NCAPD2/SPC25/ORC1/CDK1/OIP5/SPC24/MCM4/XPO1/MTBP/KIF2C/SMC3/ESCO2/PARP1/KIF18A/CDCA5/CENPH/MSH2/ZWINT/SUV39H2/SPDL1/BLM/NUF2/CCNB1/WDHD1/KNSTRN/RAD21/CENPU/CENPP/DNMT3A/ZWILCH/DSCC1/MAD2L1/NUP107/CDK2/HELLS/PLK1/AURKA/KIF22/PHF6/SGO2/PRKDC/KNTC1/…	140
CC	GO:0000776	kinetochore	65/4396	142/20758	4.58e-11	5.75e-09	4.56e-09	HJURP/SKA3/SPAG5/CENPA/BUB1B/CENPI/BUB1/NDC80/TTK/CENPF/BIRC5/SKA1/SGO1/CENPE/AURKB/NEK2/ERCC6L/KNL1/PPP1CC/SPC25/SPC24/XPO1/MTBP/KIF2C/KIF18A/CENPH/ZWINT/SPDL1/NUF2/CCNB1/KNSTRN/CENPU/ZWILCH/MAD2L1/NUP107/PLK1/KIF22/PHF6/SGO2/KNTC1/CKAP5/MIS18BP1/CENPM/SKA2/CDT1/NUP160/CENPK/DSN1/CENPO/BOD1/CENPV/SMC1A/KAT2B/DYNLT3/NUP133/CENPW/CHAMP1/DYNC1LI1/SEPT6/CENPN/NSL1/INCENP/CBX5/ITGB3BP/TPR	65
CC	GO:0000777	condensed chromosome kinetochore	54/4396	111/20758	1.16e-10	1.24e-08	9.88e-09	HJURP/SKA3/SPAG5/CENPA/BUB1B/BUB1/NDC80/CENPF/BIRC5/SKA1/SGO1/CENPE/NEK2/ERCC6L/KNL1/PPP1CC/SPC25/SPC24/KIF2C/CENPH/ZWINT/SPDL1/NUF2/CCNB1/KNSTRN/CENPU/ZWILCH/MAD2L1/NUP107/PLK1/PHF6/SGO2/KNTC1/CKAP5/MIS18BP1/CENPM/SKA2/CDT1/CENPK/DSN1/CENPO/BOD1/CENPV/SMC1A/DYNLT3/NUP133/CENPW/CHAMP1/DYNC1LI1/SEPT6/CENPN/NSL1/INCENP/ITGB3BP	54
CC	GO:0005874	microtubule	151/4396	443/20758	1.48e-10	1.39e-08	1.1e-08	KIFC3/KIF12/NUSAP1/TUBB/STMN1/EML2/TPX2/KIF20A/FAM110C/CKAP2/KIF11/NDRG1/TUBA4A/SKA3/KIF13B/SPAG5/GRAMD2B/TRPV4/KIF15/BIRC5/SKA1/SPAST/CDK2AP2/KIF18B/GABARAPL1/KIF14/CENPE/KIF26A/AURKB/NEK2/PRC1/DYNC2LI1/RACGAP1/KLHL21/KIFC1/PSRC1/TUBA1A/ASPM/CDK1/KIF4A/KIF2C/KIF18A/NICN1/DNM2/GAS2L3/KIF20B/GTSE1/KNSTRN/PLK1/AURKA/EML6/KIF22/CENPJ/KIF23/KNTC1/CKAP5/CDK5R1/MAP1LC3A/CEP170/TUBA1B/SKA2/DCDC2/HAUS6/M…	151
CC	GO:0005938	cell cortex	113/4396	307/20758	1.91e-10	1.6e-08	1.27e-08	SCIN/RAPGEF3/PLEKHH2/PTK2B/USP2/PARD6A/CNKSR1/FAM110C/LLGL2/KCNC3/TRPV4/MELK/CDH2/RHOD/MARCKS/FRY/ANLN/CNKSR2/FGF1/PARD6B/MPP1/SPTBN2/EZR/CTSZ/CLTB/RTKN2/PKD2/PLS1/DCDC2/COBL/MYO5B/TRIP10/EXOC3/HFE/MLPH/GIPC1/SHROOM4/PXN/DMTN/SEPT3/RHOBTB1/MISP/SAPCD2/CDH1/CTTN/KDF1/CTNNB1/AGTRAP/DSTN/IPCEF1/RHOB/CRIP2/SHROOM1/FLOT2/RHOC/KRT19/WDR1/MYO6/GSN/RTKN/GRM7/EXOC4/ANXA2/STOX1/DBN1/PHLDB1/HMCN1/MED28/SPIR…	113
CC	GO:0000922	spindle pole	67/4396	158/20758	1.33e-09	1e-07	7.94e-08	TPX2/FAM110C/CKAP2/KIF11/CKAP2L/SPAG5/CDC6/CENPF/CDC20/SGO1/AURKB/FAM83D/NEK2/PRC1/DLGAP5/KLHL21/PSRC1/ASPM/FRY/SMC3/TACC3/SPDL1/CCNB1/KIF20B/NPM1/KNSTRN/TOPBP1/MAD2L1/PLK1/AURKA/KNTC1/CKAP5/RAE1/NEDD1/POC1A/SBDS/WDR62/DSN1/PKP4/AUNIP/BOD1/DNAAF1/CTNNB1/RMDN1/KIF2A/TNKS/SMC1A/MTCL1/TUBGCP3/CEP128/FAM161A/KATNAL1/HAUS1/DDX11/DYNC1LI1/HAUS8/CDK5RAP2/TTC28/LRMP/GPSM2/CEP85/FBF1/CALM1/NEDD9/ALMS1/NEK…	67
CC	GO:0045121	membrane raft	118/4396	336/20758	2.06e-09	1.32e-07	1.05e-07	PROM2/PLLP/KCNQ1/TEK/PTK2B/NOS3/BIRC3/TUBB/LRRK2/ATP1B1/TRADD/ICAM1/ATP1A1/CAVIN3/SDC4/MAL/CTSD/CDH2/LCK/TUBA1A/CLN3/KIF18A/STOM/PTGS2/TFPI/ADGRG1/CFLAR/PLSCR1/FURIN/MAPK3/SPRED1/MYO1C/EZR/CAVIN2/MYOF/ADD2/TGFBR2/S1PR1/HYAL2/LYN/S100A10/CAVIN4/ADCYAP1R1/BMPR1A/TUBA1B/ATP2B1/APP/CAV2/FYN/STX12/DPP4/CDH1/CHRNA7/STAT6/UNC5B/CASP8/MARVELD1/EDNRB/CTNNB1/TLR1/ATP1B3/TNFRSF1B/AHNAK/FLOT2/PDPN/UNC5A/AKAP…	118
CC	GO:0005657	replication fork	38/4396	71/20758	2.1e-09	1.32e-07	1.05e-07	UHRF1/RAD51/PIF1/MCM10/BCL6/CDC45/XRCC2/BLM/WDHD1/TOP1/CDC5L/PRIM2/DNMT1/MMS22L/ZRANB3/RFC4/RFC3/H2AFX/RFC2/MCM3/DONSON/RAD18/GINS2/TIMELESS/GINS4/POLD4/SMARCAD1/TONSL/PCNA/PRIM1/RFC5/SMARCA5/WRN/POLA1/BAZ1B/POLD3/POLD1/POLA2	38
CC	GO:0098857	membrane microdomain	118/4396	337/20758	2.52e-09	1.46e-07	1.16e-07	PROM2/PLLP/KCNQ1/TEK/PTK2B/NOS3/BIRC3/TUBB/LRRK2/ATP1B1/TRADD/ICAM1/ATP1A1/CAVIN3/SDC4/MAL/CTSD/CDH2/LCK/TUBA1A/CLN3/KIF18A/STOM/PTGS2/TFPI/ADGRG1/CFLAR/PLSCR1/FURIN/MAPK3/SPRED1/MYO1C/EZR/CAVIN2/MYOF/ADD2/TGFBR2/S1PR1/HYAL2/LYN/S100A10/CAVIN4/ADCYAP1R1/BMPR1A/TUBA1B/ATP2B1/APP/CAV2/FYN/STX12/DPP4/CDH1/CHRNA7/STAT6/UNC5B/CASP8/MARVELD1/EDNRB/CTNNB1/TLR1/ATP1B3/TNFRSF1B/AHNAK/FLOT2/PDPN/UNC5A/AKAP…	118
CC	GO:0098589	membrane region	120/4396	348/20758	5.2e-09	2.8e-07	2.22e-07	PROM2/PLLP/KCNQ1/TEK/PTK2B/NOS3/BIRC3/TUBB/LRRK2/ATP1B1/TRADD/ICAM1/ATP1A1/CAVIN3/SDC4/MAL/CTSD/CDH2/LCK/TUBA1A/XPO1/CLN3/KIF18A/STOM/PTGS2/TFPI/ADGRG1/CFLAR/PLSCR1/FURIN/MAPK3/SPRED1/MYO1C/EZR/CAVIN2/MYOF/ADD2/TGFBR2/S1PR1/HYAL2/LYN/S100A10/CAVIN4/ADCYAP1R1/BMPR1A/TUBA1B/ATP2B1/APP/CAV2/FYN/STX12/DPP4/CDH1/CHRNA7/STAT6/UNC5B/CASP8/MARVELD1/EDNRB/CTNNB1/TLR1/ATP1B3/TNFRSF1B/AHNAK/FLOT2/CD46/PDPN/…	120
CC	GO:0030055	cell-substrate junction	149/4396	459/20758	8.57e-09	4.3e-07	3.42e-07	TEK/PTK2B/ITGB4/PLAU/ITGA2/STARD8/ICAM1/ENAH/WASF1/TGM2/SDC4/LMO7/TRPV4/L1CAM/LIMS2/CDH2/FGFR3/PPP1CC/MARCKS/AIF1L/ARHGAP24/DNM2/ARPC1B/ENG/NPM1/CAPN5/MAPK3/CD151/ZFYVE21/VASP/EZR/PPFIBP1/CD59/CD9/KIF23/FZD2/CD81/RRAS/PABPC1/ATP6V0C/PROCR/CAV2/CAT/SLC9A3R2/PXN/CAPN1/YWHAQ/SENP1/MISP/CHP1/PTK7/DPP4/JUP/RPL6/FES/CTTN/CTNNB1/TNS1/LPXN/EVL/EHD3/RHOB/ITGAV/GDI2/ITGA3/AHNAK/ATAT1/FLOT2/CD46/BCAR1/GSN/F…	149
CC	GO:0005911	cell-cell junction	154/4396	479/20758	1e-08	4.49e-07	3.56e-07	CEACAM1/KIFC3/TEK/WNK4/AQP3/ILDR1/USP53/ATP1B1/PRKCH/CGN/PARD6A/PPL/SMAGP/CNKSR1/ATP1A1/CLDN15/PCDH1/NDRG1/MPP7/STARD10/HPN/EVPL/MARVELD3/CDH2/CDCA3/ESAM/SKAP1/GJC1/B4GALT1/CLDN7/PARD6B/VASP/CDH7/LYN/PKD2/ADCYAP1R1/IQGAP3/ECT2/KAZN/APP/TMEM47/CDH24/GJA5/SHROOM4/EPB41L4B/LIN7A/AKR1B1/PKP4/SAPCD2/PTK7/DPP4/JUP/CDH1/CNTNAP2/F11R/PARD6G/CTNNB1/VANGL2/COL13A1/TIAM1/SYNPO/HEG1/CLDN1/JAM3/TJP2/AHNAK/SHR…	154
CC	GO:0031252	cell leading edge	136/4396	411/20758	1.01e-08	4.49e-07	3.56e-07	RAPGEF3/ABI3/EPS8L2/PLEKHH2/INPP5J/PTK2B/PIEZO1/ITGB4/FGD3/CCDC88A/ENAH/PARD6A/WASF1/GPER1/KCNC3/TRPV4/KITLG/TNFRSF12A/PSD4/KCNC4/WWC1/GABARAPL1/S100A6/GABRE/CARMIL1/CDH2/KLHL2/INPP5K/FGD4/KIF18A/CIB1/ANTXR1/AIF1L/PDE4A/DNM2/CDC42BPG/STX4/PLEKHO1/MYO1C/VASP/EZR/WASF3/MTM1/PKD2/ABI2/COBL/ATP2B1/APP/DOCK8/RINL/PXN/DPP4/CDH1/CNTNAP2/EPS8L1/ARHGAP45/MTMR14/CTTN/KDF1/SPATA13/DYSF/CTNNB1/ROBO2/FGD5/EVL…	136
CC	GO:0072686	mitotic spindle	48/4396	104/20758	1.09e-08	4.54e-07	3.61e-07	NUSAP1/EML2/TPX2/KIF11/CKAP2L/SPAG5/KIF18B/CENPE/AURKB/FAM83D/RACGAP1/KIFC1/ASPM/CDK1/SMC3/TACC3/CAPG/KIF18A/KIF20B/KNSTRN/MAD2L1/AURKA/KIF22/KIF23/CDC7/PKD2/DCDC2/RAE1/ECT2/ESPL1/PKP4/CTTN/KDF1/TNKS/YEATS2/SMC1A/RCC2/DYNLT3/ATAT1/FAM161A/IQCB1/CCSAP/GEM/CDK5RAP2/HAUS3/GPSM2/TPR/SIRT2	48
CC	GO:0005924	cell-substrate adherens junction	147/4396	454/20758	1.3e-08	5.14e-07	4.09e-07	TEK/PTK2B/PLAU/ITGA2/STARD8/ICAM1/ENAH/WASF1/TGM2/SDC4/LMO7/TRPV4/L1CAM/LIMS2/CDH2/FGFR3/PPP1CC/MARCKS/AIF1L/ARHGAP24/DNM2/ARPC1B/ENG/NPM1/CAPN5/MAPK3/CD151/ZFYVE21/VASP/EZR/PPFIBP1/CD59/CD9/KIF23/FZD2/CD81/RRAS/PABPC1/ATP6V0C/PROCR/CAV2/CAT/SLC9A3R2/PXN/CAPN1/YWHAQ/SENP1/MISP/CHP1/PTK7/DPP4/JUP/RPL6/FES/CTTN/CTNNB1/TNS1/LPXN/EVL/EHD3/RHOB/ITGAV/GDI2/ITGA3/AHNAK/ATAT1/FLOT2/CD46/BCAR1/GSN/FLT1/TH…	147
CC	GO:0000940	condensed chromosome outer kinetochore	13/4396	14/20758	1.91e-08	7.17e-07	5.69e-07	SKA3/BUB1B/BUB1/NDC80/CENPF/SKA1/CENPE/SPDL1/CCNB1/PLK1/SKA2/BOD1/NUP133	13
CC	GO:0043235	receptor complex	132/4396	400/20758	2e-08	7.17e-07	5.69e-07	CEACAM1/PTPRB/TEK/PTK2B/ITGB4/ITGA2/GPR160/TRADD/CD40/VDR/GABRE/GPRC5C/KCTD16/FGFR3/PORCN/SKAP1/ABHD12/SHANK2/CHRNA5/OSMR/ACVR1B/ENG/TIE1/NR3C2/PTH1R/TGFBR2/LYN/AHR/ADCYAP1R1/BMPR1A/CALCRL/TOLLIP/ITGB8/NPNT/CD74/APP/BMPR1B/NPR1/HFE/EPHA1/CHRNA9/CHRNA7/ROR2/ITPR3/ACVR2B/HSPD1/CHRNA1/LEPR/CHRFAM7A/TLR1/HSP90AB1/GFRA1/ITGAV/CNIH2/ERBB2/ERBB3/ITGA3/MAP3K21/LOXL4/LRP2/ADRA2A/CNTFR/FGFR1/RAMP2/FLT4/TLR…	132
CC	GO:0005925	focal adhesion	145/4396	451/20758	2.69e-08	9.2e-07	7.31e-07	TEK/PTK2B/PLAU/ITGA2/STARD8/ICAM1/ENAH/WASF1/TGM2/SDC4/LMO7/TRPV4/L1CAM/LIMS2/CDH2/FGFR3/PPP1CC/MARCKS/AIF1L/ARHGAP24/DNM2/ARPC1B/ENG/NPM1/CAPN5/MAPK3/CD151/ZFYVE21/VASP/EZR/PPFIBP1/CD59/CD9/KIF23/FZD2/CD81/RRAS/PABPC1/ATP6V0C/PROCR/CAV2/CAT/SLC9A3R2/PXN/CAPN1/YWHAQ/SENP1/MISP/CHP1/PTK7/DPP4/JUP/RPL6/FES/CTTN/CTNNB1/TNS1/LPXN/EVL/EHD3/RHOB/ITGAV/GDI2/ITGA3/AHNAK/ATAT1/FLOT2/CD46/BCAR1/GSN/FLT1/TH…	145
CC	GO:0099568	cytoplasmic region	151/4396	486/20758	1.58e-07	5.16e-06	4.1e-06	SCIN/RAPGEF3/CFAP221/PLEKHH2/PTK2B/USP2/LRRK2/PARD6A/CNKSR1/FAM110C/LLGL2/KCNC3/TRPV4/MELK/CENPF/SPAST/GABARAPL1/CDH2/DYNC2LI1/RHOD/MARCKS/ABHD12/FRY/KIF4A/MNS1/TMEM141/ANLN/CNKSR2/FGF1/PARD6B/MPP1/SPTBN2/EZR/CTSZ/CLTB/RTKN2/PKD2/PLS1/DCDC2/COBL/MYO5B/TRIP10/EXOC3/HFE/KIF1A/MLPH/FXR1/GIPC1/SHROOM4/ARMC4/PXN/DMTN/SEPT3/RHOBTB1/KIF3B/AKR1B1/MISP/SAPCD2/CDH1/AP3M1/CTTN/KDF1/DNAAF1/CTNNB1/AGTRAP/BLOC…	151
CC	GO:0033267	axon part	119/4396	367/20758	2.81e-07	8.82e-06	7e-06	INPP5J/PTK2B/ITGA2/LRRK2/TPX2/CPEB4/GPER1/KIF13B/CD40/SYNGR1/TRPV4/L1CAM/KCNC4/SPAST/BLVRB/HNRNPR/SHANK2/KIF4A/SLC32A1/CIB1/DNM2/GOT1/KIF20B/AURKA/CDK5R1/CTSZ/NMU/NAPA/COBL/NDRG2/ADRA2C/RTN4/EXOC3/APP/SYNJ1/KIF1A/MBP/KIF3B/CNTNAP2/AP3M1/CTTN/AMFR/ROBO2/BLOC1S6/PINK1/TIAM1/KCNC1/TNFRSF1B/ITGA3/MYH14/HIF1A/CDKL5/RTN4R/FSCN1/ANK3/KCNA6/SYT7/PDYN/THY1/PNOC/EXOC4/KCNK2/ATP6V0D1/TRIM46/AUTS2/DBN1/STMN4…	119
CC	GO:0031256	leading edge membrane	67/4396	178/20758	3.46e-07	1.04e-05	8.28e-06	EPS8L2/PIEZO1/GPER1/KCNC3/TRPV4/PSD4/KCNC4/WWC1/GABARAPL1/GABRE/INPP5K/CIB1/ANTXR1/AIF1L/PDE4A/DNM2/PLEKHO1/MYO1C/VASP/EZR/ATP2B1/DOCK8/DPP4/CNTNAP2/EPS8L1/ARHGAP45/SPATA13/ROBO2/FGD5/KSR1/TIAM1/KCNC1/ITGAV/ABCA7/PDPN/UNC5A/MYO6/CDKL5/PSD2/THY1/PACSIN2/PAK1/WLS/SHISA8/ARHGAP44/ITGA8/OPRD1/PIP5K1A/GABRA5/PDXP/NME1/PSD3/MYO1D/SYNE2/MPP2/RIPOR2/ARHGEF4/AMPH/PALM/CD44/PTPRJ/PACSIN1/LCP1/MAPT/DDX58/GA…	67
CC	GO:0016323	basolateral plasma membrane	82/4396	235/20758	7.58e-07	2.2e-05	1.74e-05	PROM2/MUC20/CEACAM1/KCNQ1/TEK/SLC4A11/SLCO4C1/AQP3/ATP6V1B1/CA2/KCNJ16/ATP1B1/ATP1A1/AQP1/ABCC3/ARRB1/PDGFB/CDH2/SLC4A4/B4GALT1/CLDN7/STX4/ST14/MYO1C/EZR/PTH1R/CD81/PKD2/ATP2B1/ABCC6/SLC26A7/SHROOM4/PIANP/LIN7A/LEPR/CTNNB1/VANGL2/MAP7/LDLRAP1/HSP90AB1/CLDN1/ERBB2/ERBB3/MAP4K2/ITGA3/FLOT2/CLDN4/ADRA2A/PDPN/ANK3/CADM1/ANXA2/CD34/EPCAM/SLC27A5/STK39/EPPK1/ANXA1/SLC9A1/HPGD/SLC2A9/NOD1/GPIHBP1/MET/MY…	82
CC	GO:0005871	kinesin complex	30/4396	62/20758	1.75e-06	4.75e-05	3.77e-05	KIFC3/KIF12/KIF20A/KIF11/KIF13B/KIF15/KIF18B/KIF14/CENPE/KIF26A/KIFC1/KIF4A/KIF2C/KIF18A/KIF20B/KIF22/KIF23/KIF1A/KIF3B/KIF6/KIF16B/KIF2A/KIFC2/KIF9/KIF1C/KIF7/KIF26B/KIF24/KIF3C/KIF21B	30
CC	GO:0005775	vacuolar lumen	72/4396	203/20758	1.77e-06	4.75e-05	3.77e-05	HYAL1/FRK/NAAA/FUCA1/TUBB/PADI2/SDC4/HEXA/TCN2/CTSD/GPC2/ADA2/ARSA/ASAH1/RNASET2/CTSA/GAA/NAGLU/GCA/NAPRT/DPP7/TOLLIP/MAN2B2/SMPD1/CCT2/CD74/GRN/DSN1/NEU1/PRELP/ARHGAP45/CTSL/SDC1/CYB5R3/MANBA/GNS/GALNS/PSAP/GPC4/GLB1/AGRN/GDI2/C3/ANXA2/DNAJC3/SDCBP/CTSC/TRAPPC1/UNC13D/PYGB/GBA/CUBN/IDUA/CTSV/GGH/SGSH/VAT1/GYG2/NPC2/FABP5/BGN/NSG1/AGA/CTSS/PRKCD/GYG1/CPPED1/GPC6/PYCARD/NEU4/CTSF/CSPG4	72
CC	GO:0051233	spindle midzone	20/4396	34/20758	1.94e-06	5.04e-05	4e-05	CCDC69/CDC6/BUB1B/KIF18B/KIF14/CENPE/AURKB/RACGAP1/CDCA8/KIF18A/KIF20B/PLK1/AURKA/APP/PKP4/CTTN/RIF1/CENPV/RCC2/GEM	20
CC	GO:0043596	nuclear replication fork	23/4396	43/20758	3.21e-06	8.05e-05	6.39e-05	MCM10/CDC45/WDHD1/TOP1/CDC5L/PRIM2/MMS22L/ZRANB3/MCM3/GINS2/TIMELESS/GINS4/POLD4/SMARCAD1/TONSL/PCNA/PRIM1/SMARCA5/POLA1/BAZ1B/POLD3/POLD1/POLA2	23
CC	GO:0005902	microvillus	39/4396	92/20758	3.53e-06	8.58e-05	6.81e-05	PROM2/MUC20/CEACAM1/RAPGEF3/TEK/ATP6V1B1/CA2/LRRK2/KIF13B/TBC1D10A/STARD10/ICAM2/ATP6V1A/TGFB1/MYO1C/EZR/ATP6V1E1/HYAL2/CNP/SLC27A4/AKR1B1/CTNNB1/ITGAV/DCXR/PDPN/MYO6/FSCN1/EXOC4/WWOX/AOC3/SPN/VCAM1/PODXL/PROM1/CTSV/PDGFA/MSN/CD44/PLEKHG6	39
CC	GO:0005876	spindle microtubule	28/4396	59/20758	6.19e-06	0.000145641	0.000115641	NUSAP1/KIF11/SKA3/SPAG5/SKA1/KIF18B/CENPE/AURKB/PRC1/KLHL21/PSRC1/CDK1/KIF4A/KIF18A/PLK1/AURKA/KNTC1/SKA2/KIF3B/BOD1/KIF2A/DYNLT3/TUBGCP3/FAM161A/TBL1XR1/CCSAP/CALM1/POLB	28
CC	GO:0045177	apical part of cell	123/4396	404/20758	6.52e-06	0.00014752	0.000117133	PROM2/MUC20/CEACAM1/KL/MUC1/TEK/ATP6V1B1/CA2/SCNN1A/SLC22A18/ATP1B1/PARD6A/SLC1A1/TCIRG1/ATP1A1/SLC22A5/SLC44A4/AQP1/TRPV4/MAL/ITPK1/HPN/CDH2/DYNC2LI1/ASPM/SHANK2/ATP6V1A/FZD3/CIB1/OSMR/PARD6B/SPTBN2/EZR/ATP6V1E1/PTH1R/SLC22A4/CD9/REEP6/HYAL2/NEDD1/MYO5B/ATP2B1/APP/ABCC6/HFE/SLC9A3R2/SHROOM4/EPB41L4B/SAPCD2/DPP4/ITPR3/ADGRF5/CTNNB1/VANGL2/HSP90AB1/SLC25A27/MTCL1/BYSL/ATP8B1/CLDN1/ERBB2/ERBB3/ADGR…	123
CC	GO:0001726	ruffle	63/4396	177/20758	6.66e-06	0.00014752	0.000117133	EPS8L2/INPP5J/FGD3/PARD6A/TRPV4/TNFRSF12A/PSD4/WWC1/S100A6/KLHL2/INPP5K/FGD4/KIF18A/CIB1/AIF1L/PDE4A/DNM2/PLEKHO1/MYO1C/EZR/MTM1/COBL/RINL/EPS8L1/ARHGAP45/MTMR14/CTTN/SPATA13/FGD5/KSR1/TIAM1/SAMSN1/ITGAV/ABCA7/PDPN/BCAR1/MYO6/FGD1/CDKL5/FSCN1/GSN/PSD2/PLCG1/CD2AP/ITGB1BP1/PACSIN2/ANXA2/PAK1/PODXL/IQGAP1/S100A11/PIP5K1A/MYH9/PDXP/NME1/PSD3/ARAP3/ARHGEF4/PTPRJ/PACSIN1/LCP1/DDX58/TLN2	63
CC	GO:0150034	distal axon	89/4396	278/20758	1.47e-05	0.00031707	0.000251759	INPP5J/PTK2B/ITGA2/LRRK2/CPEB4/GPER1/SYNGR1/TRPV4/L1CAM/KCNC4/BLVRB/HNRNPR/SHANK2/SLC32A1/CIB1/DNM2/GOT1/KIF20B/CDK5R1/CTSZ/NMU/NAPA/COBL/NDRG2/ADRA2C/RTN4/EXOC3/APP/SYNJ1/CTTN/AMFR/PINK1/TIAM1/ITGA3/MYH14/CDKL5/RTN4R/FSCN1/KCNA6/SYT7/PDYN/THY1/PNOC/EXOC4/KCNK2/ATP6V0D1/AUTS2/DBN1/STMN4/TNN/SEPT6/OLFM1/IQGAP1/ARHGAP4/LRRTM1/BOC/CPLX1/OPRD1/NPTX2/UTRN/DPYSL3/AAK1/SV2A/TANC1/PARD3/SNAP25/CAD/ANG/ST…	89
CC	GO:0098858	actin-based cell projection	73/4396	218/20758	1.56e-05	0.000325348	0.000258332	PROM2/MUC20/CEACAM1/RAPGEF3/TEK/EPS8L2/ATP6V1B1/CA2/LRRK2/ENAH/TPRN/KIF13B/TRPV4/KITLG/TBC1D10A/STARD10/ICAM2/ATP6V1A/FZD3/FGD4/B4GALT1/TGFB1/CIB1/ANTXR1/OSBPL3/ACPP/MPP1/MYO1C/VASP/EZR/ATP6V1E1/PCDH15/HYAL2/MTM1/ABI2/CNP/APP/SLC27A4/AKR1B1/SPATA13/CTNNB1/ITGAV/ATP8B1/ITGA3/RHOC/DCXR/PDPN/MYO6/FSCN1/EXOC4/WWOX/AOC3/SPN/VCAM1/PODXL/PROM1/CTSV/NPTX2/PDGFA/UTRN/CIB2/MSN/SYNE2/PDZD7/HOMER2/GPM6A/RIPO…	73
CC	GO:0097060	synaptic membrane	105/4396	341/20758	1.77e-05	0.000360129	0.000285948	CPEB3/PDE2A/CPEB4/LZTS3/GPER1/KCNC3/COMT/ARRB1/CRYAB/GABRE/KCTD16/CDH2/ARC/GRM4/SHANK2/CHRNA5/DNM2/CNKSR2/ATP2B1/SYNJ1/FBXO45/GRASP/LIN7A/NDUFS7/SYNE1/CHRNA9/CHRNA7/CHRNA1/COL13A1/PICALM/SYNPO/CNIH2/ZNRF2/ITGA3/NPTN/DNM3/ANK3/GRM7/SH2D5/SYT7/ABHD17B/GABRR1/SHANK3/SRPX2/TMUB1/PRR7/CHRND/SHC4/SHISA8/LRRTM1/NECTIN3/LRP4/ITGA8/DLGAP3/NRXN1/OPRD1/CHRNG/RIMS4/UTRN/CADPS2/CHRNB1/RIMS1/GAD2/GABRA5/CHRNA3…	105
CC	GO:0043202	lysosomal lumen	43/4396	112/20758	2.34e-05	0.000451823	0.000358755	HYAL1/NAAA/FUCA1/SDC4/HEXA/TCN2/CTSD/GPC2/ARSA/ASAH1/RNASET2/CTSA/GAA/NAGLU/MAN2B2/SMPD1/CD74/NEU1/PRELP/CTSL/SDC1/MANBA/GNS/GALNS/PSAP/GPC4/GLB1/AGRN/GBA/CUBN/IDUA/CTSV/SGSH/GYG2/NPC2/BGN/NSG1/CTSS/GYG1/GPC6/NEU4/CTSF/CSPG4	43
CC	GO:0044853	plasma membrane raft	43/4396	112/20758	2.34e-05	0.000451823	0.000358755	NOS3/LRRK2/ATP1B1/ATP1A1/CAVIN3/CDH2/CLN3/KIF18A/PTGS2/TFPI/MAPK3/SPRED1/EZR/CAVIN2/MYOF/ADD2/TGFBR2/CAVIN4/ADCYAP1R1/BMPR1A/CAV2/CDH1/CHRNA7/CTNNB1/ATP1B3/FLOT2/AKAP6/LRP6/PACSIN2/SCN5A/CAVIN1/PLVAP/CDH13/LRP4/CHRNA3/CDH15/EHD2/MYO1D/KCNA5/SELPLG/LRP8/SLC2A1/TRPC4	43
CC	GO:0014069	postsynaptic density	78/4396	240/20758	2.7e-05	0.000507378	0.000402866	CPEB3/PTK2B/ATP1A1/CPEB4/LZTS3/GPER1/ARRB1/CRYAB/CDH2/ARC/SHANK2/DNM2/CNKSR2/MIB1/ADD2/CDK5R1/LYN/RTN4/FXR1/FBXO45/DMTN/FYN/LIN7A/PKP4/ND2/TIAM1/SYNPO/CNIH2/MAP1B/NPTN/DNM3/SH2D5/ABHD17B/SHANK3/SHISA8/ARHGAP44/LRP4/ITGA8/DLGAP3/MAP2/NETO2/PLCB4/CHRNA3/TANC1/MAGI2/CACNG4/PSD3/EPB41/CTNNA2/MPP2/HOMER3/HOMER2/DLGAP1/GRIK4/GRIN2B/GRIK3/DNM1/PALM/GNG3/TMEM108/GRIK1/DROSHA/BCR/IGSF9B/GRIN2A/ANKS1B/DAB1…	78
CC	GO:0005901	caveola	36/4396	89/20758	2.86e-05	0.000515367	0.00040921	NOS3/LRRK2/ATP1B1/ATP1A1/CAVIN3/CLN3/KIF18A/PTGS2/TFPI/MAPK3/SPRED1/CAVIN2/MYOF/TGFBR2/CAVIN4/ADCYAP1R1/BMPR1A/CAV2/CDH1/CTNNB1/ATP1B3/FLOT2/AKAP6/LRP6/PACSIN2/SCN5A/CAVIN1/PLVAP/CDH13/LRP4/CDH15/EHD2/KCNA5/LRP8/SLC2A1/TRPC4	36
CC	GO:0005721	pericentric heterochromatin	13/4396	20/20758	2.87e-05	0.000515367	0.00040921	CENPA/ESCO2/HELLS/DNMT1/CBX1/CBX3/H2AFY/NCAPD3/BAZ1B/CENPB/INCENP/CBX5/SNAI1	13
CC	GO:0032279	asymmetric synapse	79/4396	245/20758	3.27e-05	0.000573184	0.000455118	CPEB3/PTK2B/ATP1A1/CPEB4/LZTS3/GPER1/ARRB1/CRYAB/CDH2/ARC/SHANK2/DNM2/CNKSR2/MIB1/ADD2/CDK5R1/LYN/RTN4/FXR1/FBXO45/DMTN/FYN/LIN7A/PKP4/ND2/TIAM1/SYNPO/CNIH2/MAP1B/NPTN/DNM3/GRM7/SH2D5/ABHD17B/SHANK3/SHISA8/ARHGAP44/LRP4/ITGA8/DLGAP3/MAP2/NETO2/PLCB4/CHRNA3/TANC1/MAGI2/CACNG4/PSD3/EPB41/CTNNA2/MPP2/HOMER3/HOMER2/DLGAP1/GRIK4/GRIN2B/GRIK3/DNM1/PALM/GNG3/TMEM108/GRIK1/DROSHA/BCR/IGSF9B/GRIN2A/ANKS1B…	79
CC	GO:0005875	microtubule associated complex	56/4396	160/20758	3.64e-05	0.000622019	0.000493893	KIFC3/KIF12/EML2/KIF20A/KIF11/KIF13B/KIF15/BIRC5/KIF18B/KIF14/CENPE/KIF26A/AURKB/DYNC2LI1/KIFC1/CDCA8/KIF4A/KIF2C/KIF18A/KIF20B/AURKA/KIF22/KIF23/HAUS6/KIF1A/PXN/KIF3B/KIF6/KIF16B/MAP7/KIF2A/KIFC2/KIF9/MAP1B/KIF1C/DYNLT3/KIF7/KIF26B/HAUS1/DNAH7/DYNC1LI1/HAUS8/DYNLRB1/HAUS3/MAP2/KIF24/HAUS5/KIF3C/KIF21B/TPR/DYNLRB2/DNAH6/DNAH14/LRP8/MAPT/DNAH10	56
CC	GO:0099572	postsynaptic specialization	78/4396	242/20758	3.72e-05	0.000622019	0.000493893	CPEB3/PTK2B/ATP1A1/CPEB4/LZTS3/GPER1/ARRB1/CRYAB/CDH2/ARC/SHANK2/DNM2/CNKSR2/MIB1/ADD2/CDK5R1/LYN/RTN4/FXR1/FBXO45/DMTN/FYN/LIN7A/PKP4/ND2/TIAM1/SYNPO/CNIH2/MAP1B/NPTN/DNM3/SH2D5/ABHD17B/SHANK3/SHISA8/ARHGAP44/LRP4/ITGA8/DLGAP3/MAP2/NETO2/PLCB4/CHRNA3/TANC1/MAGI2/CACNG4/PSD3/EPB41/CTNNA2/MPP2/HOMER3/HOMER2/DLGAP1/GRIK4/GRIN2B/GRIK3/DNM1/PALM/GNG3/TMEM108/GRIK1/DROSHA/BCR/IGSF9B/GRIN2A/ANKS1B/DAB1…	78
CC	GO:0000792	heterochromatin	33/4396	81/20758	5.11e-05	0.000836008	0.000663804	HIST1H1B/EME1/CENPA/UHRF1/ESCO2/DNMT3A/H2AFZ/SIRT1/HELLS/CBX2/DNMT1/CBX1/TOP2B/HMGA2/CBX3/H2AFY/TCP1/RRP1B/RNF2/SMARCAD1/NCAPD3/BEND3/CBX6/BAZ1B/CENPB/INCENP/TNKS1BP1/SALL1/CBX5/SNAI1/CDKN2A/SIRT2/SALL4	33
CC	GO:0098984	neuron to neuron synapse	79/4396	249/20758	6.09e-05	0.000942763	0.00074857	CPEB3/PTK2B/ATP1A1/CPEB4/LZTS3/GPER1/ARRB1/CRYAB/CDH2/ARC/SHANK2/DNM2/CNKSR2/MIB1/ADD2/CDK5R1/LYN/RTN4/FXR1/FBXO45/DMTN/FYN/LIN7A/PKP4/ND2/TIAM1/SYNPO/CNIH2/MAP1B/NPTN/DNM3/GRM7/SH2D5/ABHD17B/SHANK3/SHISA8/ARHGAP44/LRP4/ITGA8/DLGAP3/MAP2/NETO2/PLCB4/CHRNA3/TANC1/MAGI2/CACNG4/PSD3/EPB41/CTNNA2/MPP2/HOMER3/HOMER2/DLGAP1/GRIK4/GRIN2B/GRIK3/DNM1/PALM/GNG3/TMEM108/GRIK1/DROSHA/BCR/IGSF9B/GRIN2A/ANKS1B…	79
CC	GO:0098794	postsynapse	140/4396	491/20758	6.11e-05	0.000942763	0.00074857	CPEB3/PTK2B/FBXO2/LRRK2/ATP1A1/CPEB4/APBA2/LZTS3/GPER1/KCNC3/COMT/ARRB1/CRYAB/GABRE/PALMD/KCTD16/CDH2/PPP1CC/ARC/SHANK2/CHRNA5/DNM2/CNKSR2/STX4/MIB1/ADD2/CDK5R1/NR1D1/LYN/CLTB/RTN4/ATP2B1/APP/KIF1A/FXR1/GIPC1/FBXO45/GRASP/DMTN/FYN/LIN7A/PKP4/SYNE1/CHRNA9/CHRNA7/CTTN/CHRNA1/ND2/COL13A1/ASAP1/PICALM/TIAM1/SYNPO/CNIH2/MAP1B/NPTN/DNM3/ANK3/GRM7/SH2D5/ABHD17B/GABRR1/SHANK3/TMUB1/PRR7/CHRND/SHC4/SHISA8…	140
CC	GO:0016328	lateral plasma membrane	27/4396	62/20758	6.13e-05	0.000942763	0.00074857	CEACAM1/ATP6V1B1/CLDN15/FZD3/CLDN7/MYO1C/IQGAP3/ABCC6/JUP/CDH1/CTNNB1/VANGL2/MTCL1/CLDN1/ERBB3/CLDN4/ANK3/SCN5A/OCLN/EPCAM/IQGAP1/ANXA1/GJA1/GPSM2/NSG1/SNTA1/CLDN3	27
CC	GO:0032155	cell division site part	29/4396	69/20758	7.32e-05	0.00107109	0.000850467	KIF20A/CEP55/RACGAP1/PPP1CC/ICAM2/PLK4/ANLN/RTKN2/ECT2/PITPNM1/RHOB/MYLK/TUBGCP3/RHOC/RTKN/PSD2/FSD1/HMCN1/SPIRE2/SEPT6/MASTL/HMCN2/MYH9/RAB11FIP4/PDXP/LIMA1/MZT1/PLCD3/PLEKHG6	29
CC	GO:0005766	primary lysosome	58/4396	171/20758	7.4e-05	0.00107109	0.000850467	FRK/SLCO4C1/FUCA1/TUBB/ANXA11/PADI2/SYNGR1/HEXA/ADA2/ARSA/RNASET2/CTSA/B4GALT1/STOM/GAA/ACPP/GCA/NAPRT/DPP7/TOLLIP/ATP6V0C/VAMP8/CCT2/GRN/PRCP/DSN1/ARHGAP45/TOM1/CYB5R3/MANBA/GNS/GALNS/PSAP/GLB1/ABCA13/CKAP4/GDI2/LAMP1/TMEM179B/C3/ANXA2/DNAJC3/SDCBP/CTSC/TRAPPC1/UNC13D/PYGB/STXBP2/LRMP/GGH/VAT1/NPC2/FABP5/STX3/AGA/PRKCD/CPPED1/PYCARD	58
CC	GO:0042582	azurophil granule	58/4396	171/20758	7.4e-05	0.00107109	0.000850467	FRK/SLCO4C1/FUCA1/TUBB/ANXA11/PADI2/SYNGR1/HEXA/ADA2/ARSA/RNASET2/CTSA/B4GALT1/STOM/GAA/ACPP/GCA/NAPRT/DPP7/TOLLIP/ATP6V0C/VAMP8/CCT2/GRN/PRCP/DSN1/ARHGAP45/TOM1/CYB5R3/MANBA/GNS/GALNS/PSAP/GLB1/ABCA13/CKAP4/GDI2/LAMP1/TMEM179B/C3/ANXA2/DNAJC3/SDCBP/CTSC/TRAPPC1/UNC13D/PYGB/STXBP2/LRMP/GGH/VAT1/NPC2/FABP5/STX3/AGA/PRKCD/CPPED1/PYCARD	58
CC	GO:0005905	clathrin-coated pit	31/4396	76/20758	8.3e-05	0.00115838	0.000919777	SGIP1/AP1S3/ARRB1/DNM2/LRP10/CLTB/APP/SYNJ1/CTTN/HSPD1/EPN1/LDLRAP1/PICALM/SORT1/LRP2/ATAT1/MYO6/RAMP2/REPS1/SH3BP4/AP2A2/DAB2/CUBN/AAK1/AP1S2/LRP12/VLDLR/EPN3/EGFR/INPP5F/FCHO1	31
CC	GO:0098802	plasma membrane receptor complex	64/4396	194/20758	8.31e-05	0.00115838	0.000919777	CEACAM1/PTK2B/ITGB4/ITGA2/CD40/PORCN/SKAP1/ABHD12/SHANK2/CHRNA5/OSMR/ACVR1B/ENG/TGFBR2/LYN/BMPR1A/CALCRL/TOLLIP/ITGB8/NPNT/BMPR1B/HFE/CHRNA9/CHRNA7/CHRNA1/CHRFAM7A/TLR1/ITGAV/CNIH2/ITGA3/CNTFR/RAMP2/TLR2/SHANK3/IL6ST/CHRND/PTPN6/SDCBP/TRIP6/SHISA8/ITGB5/RAMP1/IL10RB/DAB2/ITGA8/CHRNG/CHRNB1/B2M/MYH9/ITGA11/CHRNA3/CACNG4/GRIK4/GRIN2B/GRIK3/CHRNB4/GRIK1/ITGAL/GRIN2A/OLFM3/DLG4/CHRNA4/STXBP5/CPT1C	64
CC	GO:0030863	cortical cytoskeleton	42/4396	114/20758	8.84e-05	0.00121048	0.000961139	RAPGEF3/PLEKHH2/LLGL2/TRPV4/CDH2/ANLN/MPP1/SPTBN2/EZR/RTKN2/PLS1/DCDC2/HFE/MLPH/SHROOM4/DMTN/CDH1/CTTN/DSTN/SHROOM1/FLOT2/KRT19/WDR1/GSN/RTKN/DBN1/MED28/CAPN2/RIMS4/UTRN/ACTN4/RIMS1/MYH9/CIB2/EPB41/LLGL1/DLG4/SLC2A1/TRPC4/SPTB/PCLO/CAP2	42
CC	GO:0044448	cell cortex part	59/4396	176/20758	9.36e-05	0.00125806	0.000998924	RAPGEF3/PLEKHH2/LLGL2/TRPV4/CDH2/ANLN/MPP1/SPTBN2/EZR/CTSZ/CLTB/RTKN2/PKD2/PLS1/DCDC2/MYO5B/EXOC3/HFE/MLPH/SHROOM4/DMTN/SEPT3/SAPCD2/CDH1/CTTN/DSTN/SHROOM1/FLOT2/KRT19/WDR1/GSN/RTKN/EXOC4/DBN1/PHLDB1/MED28/SEPT6/CAPN2/MYL12B/GPSM2/RIMS4/UTRN/ACTN4/RIMS1/MYH9/GNAI1/CIB2/SH3BP1/EPB41/LLGL1/ENO1/EXOC3L1/TNFAIP2/DLG4/SLC2A1/TRPC4/SPTB/PCLO/CAP2	59
CC	GO:0042555	MCM complex	9/4396	12/20758	9.96e-05	0.00131552	0.00104455	MCM6/MCM7/MCM2/MCM4/MMS22L/MCM3/TONSL/MCM8/MCM5	9
CC	GO:0043296	apical junction complex	51/4396	147/20758	0.000102373	0.00132908	0.00105531	KIFC3/WNK4/USP53/CGN/PARD6A/CLDN15/MPP7/MARVELD3/ESAM/CLDN7/PARD6B/VASP/ADCYAP1R1/ECT2/SHROOM4/EPB41L4B/LIN7A/SAPCD2/JUP/CDH1/F11R/PARD6G/CTNNB1/SYNPO/CLDN1/JAM3/TJP2/SHROOM1/PLEKHA7/CLDN4/ANK3/CGNL1/AMOTL1/PATJ/CDK4/OCLN/EPCAM/EPPK1/NECTIN3/CDH5/JAM2/PMP22/MAGI2/PARD3/FBF1/SH3BP1/FZD5/CLDN3/WNK3/AMOTL2/DDX58	51
CC	GO:0030496	midbody	57/4396	171/20758	0.000144554	0.0018449	0.00146488	CCDC69/ANXA11/KIF20A/SPAG5/TACC1/CENPF/BIRC5/SPAST/KIF14/CENPE/CEP55/AURKB/NEK2/PRC1/BCL3/RACGAP1/PPP1CC/CDCA8/PSRC1/ASPM/CDK1/KIF4A/CAPG/DNM2/ANLN/KIF20B/PLK1/AURKA/KIF23/ECT2/EXOC3/PIK3CB/RAP2A/KIF3B/PKP4/PITPNM1/RAN/MTCL1/RCC2/EXOC4/ANXA2/CHAMP1/GEM/DDX11/CNTRL/SEPT6/IQGAP1/TTC28/KLHDC8B/GNAI1/INCENP/RAB11FIP4/PDXP/URB2/MAPRE3/SIRT2/SLC2A1	57
CC	GO:0005604	basement membrane	35/4396	92/20758	0.00015991	0.00200687	0.00159349	NTN4/COL2A1/MMRN2/COL4A4/VWA1/LAD1/LAMA4/SMC3/CD151/FGF9/NPNT/P3H2/ADAMTS1/COL18A1/AGRN/TIMP3/COL7A1/ANXA2/LAMA5/HMCN1/HMCN2/CST3/LAMB2/ANG/COLQ/LOXL2/LAMC2/EGFLAM/THBS4/DST/LAMC1/CCDC80/LAMA1/MATN2/APLP1	35
CC	GO:0016324	apical plasma membrane	99/4396	335/20758	0.000171379	0.00211554	0.00167978	PROM2/MUC20/CEACAM1/KL/MUC1/TEK/ATP6V1B1/SCNN1A/SLC22A18/ATP1B1/PARD6A/SLC1A1/TCIRG1/ATP1A1/SLC22A5/SLC44A4/AQP1/TRPV4/MAL/ITPK1/HPN/CDH2/ASPM/SHANK2/ATP6V1A/FZD3/CIB1/OSMR/PARD6B/SPTBN2/EZR/ATP6V1E1/PTH1R/SLC22A4/CD9/HYAL2/ATP2B1/ABCC6/SLC9A3R2/SHROOM4/SAPCD2/DPP4/VANGL2/HSP90AB1/MTCL1/ATP8B1/CLDN1/ERBB2/ERBB3/ADGRG2/SLC12A2/SHROOM1/LRP2/CLDN4/PDPN/CNTFR/AMOTL1/PATJ/THY1/KCNK2/CD34/OTOG/ATP6V0D1…	99
CC	GO:0016327	apicolateral plasma membrane	12/4396	20/20758	0.000180327	0.00219011	0.00173898	CLDN7/JUP/MTCL1/CLDN4/KRT19/OCLN/THBD/EPPK1/KRT8/FZD6/PALM/CLDN3	12
CC	GO:0032154	cleavage furrow	24/4396	56/20758	0.000208741	0.00249496	0.00198104	KIF20A/CEP55/RACGAP1/PPP1CC/ICAM2/PLK4/ECT2/PITPNM1/RHOB/MYLK/RHOC/PSD2/FSD1/HMCN1/SPIRE2/SEPT6/MASTL/HMCN2/MYH9/RAB11FIP4/PDXP/LIMA1/PLCD3/PLEKHG6	24
CC	GO:0000780	condensed nuclear chromosome, centromeric region	13/4396	23/20758	0.000222062	0.0026127	0.00207453	CENPA/BUB1B/BUB1/NDC80/AURKB/NUF2/CCNB1/PLK1/AURKA/MIS18BP1/DSN1/CENPB/SYCP2L	13
CC	GO:0032153	cell division site	33/4396	87/20758	0.000259083	0.00297472	0.00236198	KIF20A/CEP55/RACGAP1/PPP1CC/RHOD/ICAM2/PLK4/ANLN/RTKN2/ECT2/SEPT3/RHOBTB1/PITPNM1/RHOB/MYLK/TUBGCP3/RHOC/RTKN/PSD2/FSD1/HMCN1/SPIRE2/SEPT6/MASTL/HMCN2/MYH9/RAB11FIP4/PDXP/LIMA1/MZT1/RHOF/PLCD3/PLEKHG6	33
CC	GO:0000778	condensed nuclear chromosome kinetochore	9/4396	13/20758	0.000262501	0.00297472	0.00236198	CENPA/BUB1B/BUB1/NDC80/NUF2/CCNB1/PLK1/MIS18BP1/DSN1	9
CC	GO:0045178	basal part of cell	25/4396	60/20758	0.000264683	0.00297472	0.00236198	MUC20/CEACAM1/EDN1/TEK/ITGA2/AQP1/MYO1C/PKD2/HFE/SHROOM4/PRCP/LDLRAP1/ERBB2/ERBB3/CLDN4/ANK3/CD34/PHLDB1/SLC27A5/MET/MST1R/HOMER3/ERBB4/EGFR/DST	25
CC	GO:0005720	nuclear heterochromatin	19/4396	41/20758	0.00027931	0.00309295	0.00245585	HIST1H1B/EME1/CENPA/UHRF1/ESCO2/DNMT3A/H2AFZ/SIRT1/CBX1/CBX3/H2AFY/TCP1/RNF2/NCAPD3/BEND3/CENPB/TNKS1BP1/CBX5/SIRT2	19
CC	GO:0030426	growth cone	53/4396	160/20758	0.000288618	0.0031497	0.00250092	INPP5J/PTK2B/LRRK2/CPEB4/TRPV4/L1CAM/HNRNPR/SHANK2/CIB1/DNM2/KIF20B/CDK5R1/CTSZ/COBL/NDRG2/RTN4/EXOC3/APP/CTTN/AMFR/PINK1/TIAM1/ITGA3/MYH14/CDKL5/RTN4R/FSCN1/THY1/EXOC4/AUTS2/DBN1/STMN4/OLFM1/IQGAP1/ARHGAP4/LRRTM1/BOC/NPTX2/UTRN/DPYSL3/PARD3/SNAP25/ANG/STX3/KIF21B/GPM6A/SIRT2/GPRIN1/FEZ1/MAPT/SNCA/NGEF/CNR1	53
CC	GO:0005667	transcription factor complex	107/4396	373/20758	0.000332986	0.00358198	0.00284415	GATA2/THRB/GATA3/HNF1B/NR4A2/NONO/SIX1/EPAS1/NR4A1/PPARG/SOX17/JUNB/DACH1/STAT3/VDR/E2F7/PARP1/PPARA/E2F1/TCF12/SMAD5/NR4A3/TCF3/TBX2/CDK2/TAF5/NR1H2/E2F2/KLF4/PRKDC/HYAL2/NR1D1/RBPJ/AHR/E2F3/MXD3/IVNS1ABP/KDM1A/TLE1/NAA16/MEIS1/FOS/RCOR2/APEX1/THRA/SOX18/E2F8/PBX1/RBL1/CTNNB1/E2F6/GTF3C3/CEBPB/TLE4/SMAD9/TAF1A/GTF2E2/ARNTL/RFX3/HES6/TCF4/HIF1A/SATB2/NFATC4/NAA15/GTF3C4/WWOX/CDK4/ZFPM1/GTF2E1/TEA…	107
CC	GO:0070938	contractile ring	8/4396	11/20758	0.000356337	0.00377918	0.00300073	PRC1/ANLN/KIF20B/RTKN2/RTKN/UTRN/MYH9/PDXP	8
CC	GO:0030027	lamellipodium	64/4396	204/20758	0.000406503	0.00422386	0.00335382	RAPGEF3/ABI3/PLEKHH2/PTK2B/PIEZO1/FGD3/CCDC88A/ENAH/WASF1/TRPV4/KITLG/CARMIL1/CDH2/KLHL2/FGD4/CIB1/ANTXR1/DNM2/STX4/VASP/WASF3/PKD2/ABI2/APP/DOCK8/PXN/DPP4/CDH1/CTTN/SPATA13/DYSF/CTNNB1/FGD5/EVL/RAB3IP/ITGAV/MYLK/FLOT2/PDPN/BCAR1/FGD1/FSCN1/GSN/PLCG1/SWAP70/AMOTL1/ITGB1BP1/PAK1/CTNNA3/PODXL/ARHGAP31/RAC2/DPYSL3/SLC9A1/PIP5K1A/SH3BP1/PDXP/STX3/SYNE2/CTNNA2/ARAP3/NEDD9/CD44/CSPG4	64
CC	GO:0009925	basal plasma membrane	19/4396	42/20758	0.000409485	0.00422386	0.00335382	MUC20/CEACAM1/TEK/AQP1/MYO1C/PKD2/SHROOM4/LDLRAP1/ERBB2/ERBB3/CLDN4/ANK3/CD34/SLC27A5/MET/MST1R/ERBB4/EGFR/DST	19
CC	GO:0030427	site of polarized growth	54/4396	166/20758	0.0004213	0.00428701	0.00340396	INPP5J/PTK2B/LRRK2/CPEB4/TRPV4/L1CAM/HNRNPR/FRY/SHANK2/CIB1/DNM2/KIF20B/CDK5R1/CTSZ/COBL/NDRG2/RTN4/EXOC3/APP/CTTN/AMFR/PINK1/TIAM1/ITGA3/MYH14/CDKL5/RTN4R/FSCN1/THY1/EXOC4/AUTS2/DBN1/STMN4/OLFM1/IQGAP1/ARHGAP4/LRRTM1/BOC/NPTX2/UTRN/DPYSL3/PARD3/SNAP25/ANG/STX3/KIF21B/GPM6A/SIRT2/GPRIN1/FEZ1/MAPT/SNCA/NGEF/CNR1	54
CC	GO:0016342	catenin complex	15/4396	30/20758	0.000441418	0.00443184	0.00351896	ARMC7/CDH2/CDH7/CDH24/JUP/CDH1/CTNNB1/CDH13/CDH5/CDH10/CDH11/CDH12/CDH15/CDH20/CDH8	15
CC	GO:0034774	secretory granule lumen	106/4396	374/20758	0.000568231	0.00562997	0.00447029	SERPINA1/FRK/CTSH/FUCA1/MVP/TUBB/ACAA1/TEX264/IGF2/PDXK/PADI2/OSTF1/ALAD/CTSD/TOR4A/GHDC/PDGFB/ADA2/ARSA/HMGB1/RNASET2/CTSA/TGFB1/SLPI/CAND1/GSDMD/GCA/PNP/NAPRT/CTSZ/GAS6/DPP7/TOLLIP/KPNB1/SERPING1/CCT2/APP/GRN/CAT/DNASE1L1/QPCT/ILF2/DSN1/NEU1/JUP/ARHGAP45/CYB5R3/CDA/GSTP1/HSP90AB1/SERPINE1/CLU/GNS/CFD/GALNS/GLB1/GDI2/OLA1/CRISPLD2/TIMP3/A2M/THBS1/SERPINB1/F8/GSN/SRGN/C3/ANXA2/NFKB1/DNAJC3/PTPN6/…	106
CC	GO:0005892	acetylcholine-gated channel complex	12/4396	22/20758	0.000603656	0.00590329	0.00468731	CHRNA5/CHRNA9/CHRNA7/CHRNA1/CHRFAM7A/CHRND/CHRNG/CHRNB1/CHRNA3/CHRNB4/CHRNA4/STXBP5	12
CC	GO:0035578	azurophil granule lumen	37/4396	105/20758	0.000614652	0.00593375	0.0047115	FRK/FUCA1/TUBB/PADI2/ADA2/ARSA/RNASET2/CTSA/GCA/NAPRT/DPP7/TOLLIP/CCT2/GRN/DSN1/ARHGAP45/CYB5R3/GNS/GALNS/GLB1/GDI2/C3/ANXA2/DNAJC3/SDCBP/CTSC/TRAPPC1/UNC13D/PYGB/GGH/VAT1/NPC2/FABP5/AGA/PRKCD/CPPED1/PYCARD	37
CC	GO:0032587	ruffle membrane	35/4396	98/20758	0.000643042	0.00598219	0.00474996	EPS8L2/TRPV4/PSD4/WWC1/INPP5K/CIB1/AIF1L/PDE4A/DNM2/PLEKHO1/MYO1C/EZR/EPS8L1/ARHGAP45/SPATA13/FGD5/KSR1/TIAM1/ITGAV/ABCA7/PDPN/MYO6/CDKL5/PSD2/PACSIN2/PAK1/PIP5K1A/PDXP/NME1/PSD3/ARHGEF4/PTPRJ/PACSIN1/LCP1/DDX58	35
CC	GO:0000790	nuclear chromatin	114/4396	408/20758	0.000644064	0.00598219	0.00474996	MUC1/CBX7/IRF1/THRB/RBMX/KLF2/GATA3/HDAC2/HIST1H1B/EME1/RBBP4/HIST1H2AM/CENPA/JUNB/PPARGC1A/MSH6/CPSF6/UHRF1/STAT3/RAD51/H2AFY2/HIST1H1C/ESCO2/CDCA5/HMGB2/E2F1/TCF12/TRNP1/SMARCC1/DNMT3A/TCF3/NACC2/RAD51AP1/ASF1B/EZH2/H2AFZ/TAF5/SMARCE1/SIRT1/KLF4/WBP2/NR1D1/PBRM1/CBX1/KDM1A/SETD3/H2AFX/SOX18/CBX3/HMGXB4/NUCKS1/SIRT7/TIMELESS/H3F3A/NASP/NUFIP1/STAT6/ENC1/CTNNB1/RIF1/SINHCAF/H2AFY/CEBPB/CHAF1A/DHX…	114
CC	GO:0098793	presynapse	114/4396	408/20758	0.000644064	0.00598219	0.00474996	PDE2A/NAAA/ATP6V1B1/ITGA2/LRRK2/PRKN/APBA2/SYTL4/BCL2L1/GPER1/SYNGR2/KCNC3/SYNGR1/KCNC4/BLVRB/KCTD16/CDH2/HNRNPR/ICA1/GRM4/FZD3/CLN3/SLC32A1/GOT1/STX4/CLTB/NMU/NAPA/SYPL2/VAMP8/ADRA2C/APP/SYNJ1/KIF1A/GIPC1/FBXO45/SEPT3/LIN7A/TPRG1L/VAMP2/NUFIP1/BLOC1S6/SYT17/PICALM/RABAC1/ZNRF2/LAMP1/NPTN/GRM7/KCNA6/CLCN3/SYT7/PDYN/RAB40B/PNOC/SLC17A5/NRXN2/KCNK2/ATP6V0D1/TRAPPC4/CACNA1B/SYT13/TNN/SEPT6/ARHGAP44/…	114
CC	GO:0070160	occluding junction	44/4396	131/20758	0.000651447	0.00598219	0.00474996	WNK4/ILDR1/USP53/CGN/PARD6A/CLDN15/MPP7/MARVELD3/ESAM/CLDN7/PARD6B/VASP/ADCYAP1R1/ECT2/EPB41L4B/LIN7A/SAPCD2/F11R/PARD6G/CTNNB1/SYNPO/CLDN1/JAM3/TJP2/CLDN4/ANK3/CGNL1/AMOTL1/PATJ/CDK4/OCLN/EPCAM/EPPK1/CDH5/JAM2/PMP22/MAGI2/PARD3/SH3BP1/FZD5/CLDN3/WNK3/AMOTL2/DDX58	44
CC	GO:0043209	myelin sheath	56/4396	177/20758	0.000718667	0.00651996	0.00517696	PLLP/CA2/ATP1B1/ATP1A1/NDRG1/SDHA/CRYAB/HSPA2/TUBA1A/PDHA1/ATP6V1A/SLC25A4/STX4/EZR/NAPA/TUBA1B/CNP/CCT2/MBP/AKR1B1/ITPR3/HSPD1/TCP1/CCT5/EHD3/FAM213B/ASS1/ERBB2/GDI2/JAM3/MYH14/WDR1/CCT3/FSCN1/GSN/THY1/EXOC4/ANXA2/CNTN1/CA13/GOT2/ATP5PD/PMP22/ACO2/UCHL1/SNAP25/NME1/MYO1D/MSN/INA/CKB/DNM1/PLP1/SIRT2/PACSIN1/CNTN2	56
CC	GO:0031983	vesicle lumen	110/4396	393/20758	0.000740788	0.00657505	0.0052207	SERPINA1/FRK/CTSH/FUCA1/MVP/TUBB/ACAA1/TEX264/IGF2/PDXK/PADI2/OSTF1/ALAD/CTSD/TOR4A/GHDC/PDGFB/ADA2/ARSA/HMGB1/RNASET2/CTSA/TGFB1/SLPI/CAND1/GSDMD/GCA/PNP/NAPRT/CTSZ/GAS6/DPP7/TOLLIP/KPNB1/SERPING1/CCT2/APP/GRN/CAT/DNASE1L1/QPCT/ILF2/DSN1/NEU1/JUP/ARHGAP45/CYB5R3/CDA/GSTP1/HSP90AB1/SERPINE1/HBA2/CLU/GNS/CFD/GALNS/GLB1/GDI2/OLA1/CRISPLD2/TIMP3/A2M/THBS1/SERPINB1/F8/GSN/SRGN/C3/ANXA2/NFKB1/DNAJC3/P…	110
CC	GO:0005923	bicellular tight junction	43/4396	128/20758	0.000742204	0.00657505	0.0052207	WNK4/USP53/CGN/PARD6A/CLDN15/MPP7/MARVELD3/ESAM/CLDN7/PARD6B/VASP/ADCYAP1R1/ECT2/EPB41L4B/LIN7A/SAPCD2/F11R/PARD6G/CTNNB1/SYNPO/CLDN1/JAM3/TJP2/CLDN4/ANK3/CGNL1/AMOTL1/PATJ/CDK4/OCLN/EPCAM/EPPK1/CDH5/JAM2/PMP22/MAGI2/PARD3/SH3BP1/FZD5/CLDN3/WNK3/AMOTL2/DDX58	43
CC	GO:0032432	actin filament bundle	25/4396	64/20758	0.000841289	0.00736617	0.00584886	TEK/CRYAB/MARCKS/PLS1/SHROOM4/PXN/VANGL2/SYNPO/MYLK/MYH14/FSCN1/SYNPO2/PLS3/MYL12B/ACTN4/MYH9/CYBA/PGM5/LIMA1/MST1R/FBLIM1/NEBL/LCP1/CNN2/FLNB	25
CC	GO:0005832	chaperonin-containing T-complex	8/4396	12/20758	0.000869847	0.00752867	0.00597789	BBS12/CCT2/CCT4/TCP1/CCT5/CCT6A/CCT3/FYCO1	8
CC	GO:0060205	cytoplasmic vesicle lumen	109/4396	392/20758	0.00100212	0.00857498	0.00680868	SERPINA1/FRK/CTSH/FUCA1/MVP/TUBB/ACAA1/TEX264/IGF2/PDXK/PADI2/OSTF1/ALAD/CTSD/TOR4A/GHDC/PDGFB/ADA2/ARSA/HMGB1/RNASET2/CTSA/TGFB1/SLPI/CAND1/GSDMD/GCA/PNP/NAPRT/CTSZ/GAS6/DPP7/TOLLIP/KPNB1/SERPING1/CCT2/APP/GRN/CAT/DNASE1L1/QPCT/ILF2/DSN1/NEU1/JUP/ARHGAP45/CYB5R3/CDA/GSTP1/HSP90AB1/SERPINE1/HBA2/CLU/GNS/CFD/GALNS/GLB1/GDI2/OLA1/CRISPLD2/TIMP3/A2M/THBS1/SERPINB1/F8/GSN/SRGN/C3/ANXA2/NFKB1/DNAJC3/P…	109
CC	GO:0045211	postsynaptic membrane	78/4396	267/20758	0.00113394	0.00959389	0.00761771	CPEB3/CPEB4/LZTS3/COMT/ARRB1/GABRE/KCTD16/CDH2/ARC/SHANK2/CHRNA5/DNM2/CNKSR2/FBXO45/GRASP/LIN7A/SYNE1/CHRNA9/CHRNA7/CHRNA1/COL13A1/PICALM/SYNPO/CNIH2/DNM3/ANK3/GRM7/SH2D5/ABHD17B/GABRR1/SHANK3/TMUB1/PRR7/CHRND/SHC4/SHISA8/LRRTM1/NECTIN3/DLGAP3/OPRD1/CHRNG/UTRN/CADPS2/CHRNB1/GABRA5/CHRNA3/TANC1/CACNG4/NSG1/PSD3/IQSEC3/HOMER3/LRRTM3/HOMER2/DLGAP1/IL1RAPL1/GRIK4/GRIN2B/GRIK3/CHRNB4/DNM1/TMEM108/GRIP…	78
MF	GO:0015631	tubulin binding	143/4197	366/19443	1.51e-14	1.88e-11	1.6e-11	KIFC3/KIF12/NUSAP1/SGIP1/LRRK2/STMN1/CCDC69/EML2/CCDC88A/PRKN/KIF20A/FAM110C/KIF11/NDRG1/KIF13B/SPAG5/TRPV4/KIF15/PPARGC1A/BIRC5/SKA1/RAB11FIP5/CRYAB/SPAST/KIF18B/GABARAPL1/MYO9A/KIF14/CENPE/KIF26A/FAM83D/PRC1/HDGFL3/RACGAP1/GAS2L1/MYH11/KIFC1/PSRC1/ADNP/KIF4A/KIF2C/SMC3/KIF18A/DNM2/GAS2L3/KIF20B/MYO1C/EZR/PLK1/EML6/KIF22/PHF6/CENPJ/KIF23/CKAP5/CDK5R1/LYN/MAP1LC3A/SKA2/RAE1/MYO5B/BRCA1/MTUS1/KIF1…	143
MF	GO:0008017	microtubule binding	110/4197	283/19443	2.38e-11	1.48e-08	1.26e-08	KIFC3/KIF12/NUSAP1/SGIP1/LRRK2/CCDC69/EML2/CCDC88A/KIF20A/KIF11/NDRG1/KIF13B/SPAG5/TRPV4/KIF15/BIRC5/SKA1/CRYAB/SPAST/KIF18B/MYO9A/KIF14/CENPE/KIF26A/FAM83D/PRC1/HDGFL3/RACGAP1/GAS2L1/MYH11/KIFC1/PSRC1/KIF4A/KIF2C/KIF18A/DNM2/GAS2L3/KIF20B/MYO1C/EZR/PLK1/EML6/KIF22/KIF23/CKAP5/MAP1LC3A/SKA2/RAE1/MYO5B/MTUS1/KIF1A/SBDS/HOOK2/EML3/CAMSAP1/KIF3B/CHP1/FES/KIF6/KIF16B/KIF2A/KIFC2/TIAM1/MX1/MTCL1/KIF9/…	110
MF	GO:0050662	coenzyme binding	104/4197	295/19443	4.02e-08	1.44e-05	1.23e-05	OGDHL/UXS1/NOS3/CRYL1/SPR/ACADS/ACAT1/MAOB/PDXK/ETFDH/ALDH1A1/NFS1/HMGCL/ACADVL/SDHA/FMO4/AIFM2/PCCA/SUOX/FMO5/ACBD4/CRYZ/HSD11B2/CHDH/SHMT1/HSD17B8/ACADSB/SHMT2/HIBADH/ME3/PARP1/P4HTM/DPYD/SUV39H2/GOT1/ALAS1/SIRT1/AIFM1/SPTLC3/KDM1A/DECR1/ILVBL/NDUFV1/PNPO/IDH2/GLUD1/CAT/GLDC/SDSL/SIRT3/PHYKPL/SIRT7/P3H2/ALDH6A1/TXNRD2/PHYH/CYB5R3/OGDH/SCP2/DHFR/TP53I3/DHFR2/ACBD7/ATAT1/ALDH2/CRY2/ACACB/GPD1L/AC…	104
MF	GO:0140097	catalytic activity, acting on DNA	77/4197	201/19443	4.64e-08	1.44e-05	1.23e-05	TOP2A/EME1/NEIL3/MCM6/BRIP1/PARP3/EXO1/RAD51/MCM7/PIF1/MCM2/ERCC6L/POLQ/MCM4/NEIL1/PARP1/CDC45/XRCC2/BLM/RECQL5/DNMT3A/GINS1/TOP1/RBPJ/PBRM1/PRIM2/DNASE1/DNMT1/ZRANB3/DNA2/ENDOG/TOP2B/RAD54L/DCLRE1B/HMGA2/APEX1/DNASE1L1/GINS2/GINS4/POLD4/GEN1/RECQL4/POLE3/POLE/TDG/DHX9/DNASE2/DDX1/CHD1/PCNA/POLE2/WRN/POLA1/SNRNP40/FEN1/LIG1/CHD1L/DDX11/POLD3/LIG3/POLD1/POLA2/ANXA1/ALKBH2/DCLRE1A/MCM5/MGME1/TDP1/D…	77
MF	GO:0043142	single-stranded DNA-dependent ATPase activity	12/4197	14/19443	5.91e-07	0.000146982	0.000125117	RAD51/PIF1/POLQ/DSCC1/DNA2/RFC4/RFC3/RFC2/RAD18/DHX9/RFC5/CHTF18	12
MF	GO:0045296	cadherin binding	112/4197	349/19443	2.82e-06	0.000584303	0.000497385	EPS8L2/COBLL1/PPP1R13L/ARMC7/CGN/PPL/NDRG1/MMP24/LRRFIP1/ARHGEF16/EHD4/LAD1/TBC1D2/MPP7/GPRC5A/TBC1D10A/TMPO/NOP56/EVPL/CCNB2/CDH2/ARHGAP18/CAPG/ANLN/FAM129B/RANBP1/VASP/SPTBN2/EZR/VASN/PPFIBP1/CKAP5/CDK5R1/CDH7/CAST/RTN4/CC2D1A/EXOC3/CDH24/SLC9A3R2/GIPC1/CIP2A/ATIC/RSL1D1/JUP/CDH1/EPS8L1/F11R/RPL6/EPB41L1/CTTN/CEMIP2/MB21D2/CTNNB1/ASAP1/RAN/HSP90AB1/PICALM/UBFD1/TJP2/EIF3E/OLA1/AHNAK/CD46/MYO6/F…	112
MF	GO:0000982	transcription factor activity, RNA polymerase II proximal promoter sequence-specific DNA binding	131/4197	424/19443	3.96e-06	0.000703017	0.000598439	GATA2/ELF3/TFEB/SOX11/IRF1/ESRRA/GATA3/NR4A2/SIX1/EPAS1/LRRFIP1/NR4A1/ZBTB7B/SIX2/JUNB/FOSL2/ETV4/DACH1/SP3/STAT3/MYB/CAMTA2/MYBL2/KLF5/HLF/BHLHE40/MEOX1/FOSB/ZBTB7A/PPARA/TCF12/NR4A3/GRHL1/TCF3/CEBPD/PLSCR1/NACC2/ERG/TBX2/NFKB2/NR1H2/SIRT1/KLF4/ZBTB20/NR1D1/RBPJ/NRL/GLIS2/BTG2/MYCN/KLF15/ATF3/ETS2/EGR2/KLF10/KLF6/MEIS1/CC2D1A/FOS/FOXJ1/HMGA2/SOX18/MITF/SIX4/NUCKS1/E2F8/LITAF/BATF2/PBX1/RBL1/CEBP…	131
MF	GO:0003777	microtubule motor activity	49/4197	127/19443	9.63e-06	0.00149819	0.00127532	KIFC3/KIF12/KIF20A/KIF11/KIF13B/KIF15/KIF18B/MYO9A/KIF14/CENPE/KIF26A/DYNC2LI1/MYH11/KIFC1/KIF4A/KIF2C/SMC3/KIF18A/KIF20B/MYO1C/KIF22/KIF23/MYO5B/KIF1A/KIF3B/KIF6/KIF16B/KIF2A/KIFC2/KIF9/KIF1C/MYH14/KIF7/MYO6/KIF26B/DNAH7/DYNC1LI1/DYNLRB1/MYH9/KIF24/MYO1D/KIF3C/KIF21B/MYO5C/DYNLRB2/DNAH6/MYO1E/DNAH14/DNAH10	49
MF	GO:0003707	steroid hormone receptor activity	29/4197	64/19443	1.93e-05	0.00241652	0.00205705	PAQR5/PAQR7/ESRRA/THRB/NR4A2/GPER1/NR4A1/PPARG/PAQR8/VDR/ESRRB/PPARA/NR4A3/ESRRG/NR3C2/NR1H2/NR1D1/THRA/NR2F2/NR2F1/PPARD/NR6A1/AR/RXRG/NR5A2/RORA/LEF1/NR3C1/OR51E2	29
MF	GO:0008022	protein C-terminus binding	70/4197	205/19443	2.13e-05	0.00241652	0.00205705	CIITA/TOP2A/PTK2B/ATP1B1/EML2/MIF4GD/PPARG/CENPF/CDC20/RAD51/LCK/PPP1CC/NEIL1/KPNA3/CIB1/MSH2/TOPBP1/MYO1C/EZR/SIRT1/MKI67/TAX1BP3/PABPC1/SAE1/TOP2B/PEX16/SIPA1/BRCA2/SLC9A3R2/OPTN/YWHAQ/ZBTB16/SDC1/CTNNB1/SDCBP2/MID1IP1/AGO2/SYNJ2BP/KSR1/RABAC1/ERBB2/SASH1/TJP2/CITED1/TCF4/BCAM/SH3GL2/CD2AP/SHANK3/CACNA1B/CALCOCO1/YEATS4/DAB2/SCLT1/TAF13/GPSM2/ID1/HIC2/EPB41/ITGB3BP/HOMER3/CTGF/RAB3A/MAPRE3/DNM1…	70
MF	GO:0016829	lyase activity	68/4197	198/19443	2.25e-05	0.00241652	0.00205705	HOGA1/UXS1/CA2/CLYBL/ACAT1/ASL/NEIL3/HMGCL/ALAD/CA12/SHMT1/HADHB/SHMT2/HMGB1/POLQ/NEIL1/ME3/AUH/GOT1/MLYCD/NPR1/HMGA2/APEX1/GLDC/MOCS1/SDSL/TKFC/PHYKPL/PCBD2/ENOSF1/DDT/FECH/CENPV/DDTL/DGLUCY/CA5B/CA14/ALOX5AP/CA13/ECI1/MGST2/PAICS/ADCY2/PCBD1/MGST3/GAD2/ACO2/BCKDHA/ADCY9/CHAC1/ADCY5/HACD1/ENO1/PDXDC2P-NPIPB14P/ALDOA/ME1/FASN/PTS/ECHDC2/GMDS/PAM/POLB/SDS/ADCY4/NPR2/GAD1/HACD4/ADCY1	68
MF	GO:0019838	growth factor binding	53/4197	145/19443	2.57e-05	0.00241652	0.00205705	KL/TEK/ITGB4/COL2A1/CRIM1/IL2RG/PDGFB/PXDN/FGFR3/IGFBP7/OSMR/ACVR1B/ENG/FURIN/VASN/TGFBR2/HYAL2/DUSP1/ACVR2B/ITGAV/IGFBP6/CYR61/ERBB2/ERBB3/SORT1/A2M/THBS1/FGFR1/FLT4/RHBDF2/FLT1/ACVRL1/SRPX2/SCN5A/IL6ST/KDR/IGFBP4/RHBDF1/PDGFA/NGFR/LTBP3/IL1R1/TGFBR3/FGFR4/CTGF/RPS19/CD109/NRP2/EGFR/NOV/ESM1/IGFBP5/LTBP2	53
MF	GO:1901681	sulfur compound binding	85/4197	262/19443	2.71e-05	0.00241652	0.00205705	OGDHL/SERPINA5/ITGA2/EVA1C/MDK/GSTM3/LPL/HMGCL/HBEGF/ACADVL/MMP7/GPC2/PCCA/ACBD4/SOD3/ADA2/SUV39H2/APLP2/FGF1/ADGRG1/CHRD/GSTM4/TNXB/FGF9/ILVBL/PTGES/APP/PRELP/ALDH6A1/OGDH/ZNF146/TMEM184A/LRPAP1/COL13A1/GSTP1/ADAMTS1/SCP2/GPC4/AGRN/CYR61/CRISPLD2/ACBD7/GAL3ST4/THBS1/FGFR1/RTN4R/ACACB/ACBD5/SLIT2/ABI3BP/FBLN7/CD34/BMP7/DBI/LXN/RCC1/CHST12/DPYSL3/RSPO4/CEL/GPNMB/VEGFB/ANG/SELL/LIPG/ACOT7/TGFBR3/FG…	85
MF	GO:0000987	proximal promoter sequence-specific DNA binding	137/4197	463/19443	2.72e-05	0.00241652	0.00205705	MUC1/GATA2/ELF3/TFEB/IRF1/ESRRA/GATA3/HDAC2/HNF1B/NR4A2/SIX1/LRRFIP1/NR4A1/ZBTB7B/RBBP4/SIX2/JUNB/FOSL2/ETV4/SP3/UHRF1/STAT3/MYB/VDR/MYBL2/KLF5/BHLHE40/MEOX1/FOSB/ZBTB7A/PPARA/TCF12/SMAD5/ZNF516/SMARCC1/NR4A3/GRHL1/TCF3/CEBPD/NACC2/ERG/TBX2/HSF2/NFKB2/EZH2/H2AFZ/SMARCE1/NR1H2/KLF4/NR1D1/RBPJ/NRL/PER1/AHR/MYCN/ATF3/ETS2/EGR2/KLF10/CHD7/KLF6/MEIS1/CC2D1A/FOS/FOXJ1/HMGA2/SOX18/RFX7/MITF/SIX4/E2F8/LI…	137
MF	GO:0003774	motor activity	53/4197	146/19443	3.2e-05	0.00252221	0.00214702	KIFC3/KIF12/CGN/KIF20A/KIF11/KIF13B/KIF15/KIF18B/MYO9A/KIF14/CENPE/KIF26A/DYNC2LI1/MYH11/KIFC1/KIF4A/KIF2C/SMC3/KIF18A/KIF20B/MYO1C/KIF22/KIF23/MYO5B/KIF1A/KIF3B/KIF6/KIF16B/KIF2A/KIFC2/KIF9/KIF1C/DYNLT3/MYH14/KIF7/MYO6/KIF26B/CGNL1/DNAH7/DYNC1LI1/DYNLRB1/MYH9/KIF24/MYO1D/KIF3C/KIF21B/MYO3A/MYO5C/DYNLRB2/DNAH6/MYO1E/DNAH14/DNAH10	53
MF	GO:0043138	3'-5' DNA helicase activity	10/4197	13/19443	3.24e-05	0.00252221	0.00214702	CDC45/BLM/RECQL5/GINS1/GINS2/GINS4/RECQL4/DHX9/WRN/ASCC3	10
MF	GO:0001077	transcriptional activator activity, RNA polymerase II proximal promoter sequence-specific DNA binding	90/4197	283/19443	3.74e-05	0.00273769	0.00233044	GATA2/ELF3/TFEB/SOX11/IRF1/ESRRA/GATA3/NR4A2/SIX1/EPAS1/NR4A1/ZBTB7B/SIX2/JUNB/ETV4/STAT3/MYB/CAMTA2/MYBL2/KLF5/HLF/MEOX1/FOSB/PPARA/TCF12/NR4A3/GRHL1/CEBPD/PLSCR1/ERG/NFKB2/NR1H2/SIRT1/KLF4/RBPJ/NRL/GLIS2/MYCN/KLF15/EGR2/KLF10/KLF6/MEIS1/FOS/FOXJ1/HMGA2/SOX18/MITF/SIX4/NUCKS1/LITAF/PBX1/CEBPB/ELF1/TFAP4/EGR1/TFE3/TEF/PLAGL2/ETV1/ZNF292/TCF4/HIF1A/SATB2/GLI3/TFAP2A/SOX4/NFAT5/SPI1/HOXA10/WT1/ARID…	90
MF	GO:0004879	nuclear receptor activity	25/4197	54/19443	4.58e-05	0.00299554	0.00254993	ESRRA/THRB/NR4A2/GPER1/NR4A1/PPARG/STAT3/VDR/ESRRB/PPARA/NR4A3/ESRRG/NR1H2/NR1D1/AHR/THRA/NR2F2/NR2F1/PPARD/NR6A1/AR/RXRG/NR5A2/SREBF1/RORA	25
MF	GO:0098531	transcription factor activity, direct ligand regulated sequence-specific DNA binding	25/4197	54/19443	4.58e-05	0.00299554	0.00254993	ESRRA/THRB/NR4A2/GPER1/NR4A1/PPARG/STAT3/VDR/ESRRB/PPARA/NR4A3/ESRRG/NR1H2/NR1D1/AHR/THRA/NR2F2/NR2F1/PPARD/NR6A1/AR/RXRG/NR5A2/SREBF1/RORA	25
MF	GO:0016638	oxidoreductase activity, acting on the CH-NH2 group of donors	14/4197	23/19443	5.14e-05	0.00319813	0.00272238	MAOA/MAOB/PNPO/GLUD1/GLDC/LOXL3/LOXL4/AOC3/VCAM1/IL4I1/LOXL2/LOX/CRYM/RNLS	14
MF	GO:0019842	vitamin binding	51/4197	142/19443	6.16e-05	0.00365075	0.00310768	KL/OGDHL/PDXK/NFS1/TYMS/TCN2/RBP5/PCCA/VDR/SHMT1/SHMT2/RBP1/RBP7/LMBRD1/P4HTM/CRABP2/GOT1/ALAS1/SPTLC3/ILVBL/PNPO/CYP27C1/GLDC/SDSL/IRX5/PHYKPL/P3H2/PHYH/OGDH/DHFR/ACACB/AADAT/SLC46A1/GOT2/PYGB/SPTLC2/CUBN/SEC14L2/MARC2/P3H3/GAD2/EGLN3/PDXDC2P-NPIPB14P/FASN/PAM/SDS/ACCS/P4HA1/ABAT/GAD1/STRA6	51
MF	GO:0000978	RNA polymerase II proximal promoter sequence-specific DNA binding	131/4197	447/19443	6.54e-05	0.00369931	0.00314901	MUC1/GATA2/ELF3/TFEB/IRF1/ESRRA/GATA3/HDAC2/NR4A2/SIX1/LRRFIP1/NR4A1/ZBTB7B/RBBP4/SIX2/JUNB/FOSL2/ETV4/SP3/STAT3/MYB/VDR/MYBL2/KLF5/BHLHE40/MEOX1/FOSB/ZBTB7A/PPARA/TCF12/SMAD5/SMARCC1/NR4A3/GRHL1/TCF3/CEBPD/NACC2/ERG/TBX2/HSF2/NFKB2/EZH2/H2AFZ/SMARCE1/NR1H2/NR1D1/RBPJ/NRL/PER1/AHR/MYCN/ATF3/ETS2/EGR2/KLF10/CHD7/KLF6/MEIS1/CC2D1A/FOS/FOXJ1/HMGA2/SOX18/RFX7/MITF/SIX4/E2F8/LITAF/KDM2B/BATF2/PBX1/STA…	131
MF	GO:0016628	oxidoreductase activity, acting on the CH-CH group of donors, NAD or NADP as acceptor	15/4197	27/19443	0.00011942	0.00645905	0.00549823	AKR1C1/BLVRB/PTGR2/DPYD/PECR/DECR1/PTGR1/AKR1C2/AKR1C3/BDH2/DHCR24/LBR/FASN/TM7SF2/DHDH	15
MF	GO:0008376	acetylgalactosaminyltransferase activity	24/4197	54/19443	0.000143459	0.00743598	0.00632983	GALNT14/B3GALT4/GALNT15/B3GNT2/GALNT3/ABO/B4GALNT4/GALNT18/GALNT6/GALNT1/EXTL2/KCNA6/B3GNT9/B3GNT5/GALNT12/B3GALT1/GALNT11/CHPF/GALNT17/CHSY3/GALNT7/GBGT1/GALNT13/B3GALNT2	24
MF	GO:0016641	oxidoreductase activity, acting on the CH-NH2 group of donors, oxygen as acceptor	11/4197	17/19443	0.00015618	0.00777151	0.00661545	MAOA/MAOB/PNPO/LOXL3/LOXL4/AOC3/VCAM1/IL4I1/LOXL2/LOX/RNLS	11
MF	GO:0017124	SH3 domain binding	49/4197	140/19443	0.000175881	0.00841522	0.00716341	ELMO3/INPP5J/SGIP1/KHDRBS1/ENAH/PRKN/OSTF1/SKAP1/SHANK2/PTTG1/DNM2/PLSCR1/CABYR/VASP/ARHGAP6/LYN/ABI2/ARHGAP27/TP53BP2/TOM1L1/EFS/PLSCR4/ERRFI1/NOXA1/EVL/LRP2/AFAP1L2/BCAR1/SIRPA/INPP5D/CD2AP/ADAM15/SHANK3/REPS1/PTPN6/CBLB/ARHGAP31/GJA1/AKAP5/DPYSL3/SH3KBP1/SH3BP1/CYBA/ARHGAP1/HCLS1/PAK3/MAPT/SH3BGR/ADAM19	49
MF	GO:0019199	transmembrane receptor protein kinase activity	37/4197	98/19443	0.000190318	0.00876872	0.00746432	TEK/CRIM1/FGFR3/ACVR1B/TIE1/TGFBR2/BMPR1A/SOSTDC1/BMPR1B/EPHA1/ROR2/ACVR2B/AMHR2/ERBB2/ERBB3/MAP3K21/FGFR1/FLT4/FLT1/EPHB3/ACVRL1/MERTK/KDR/TYRO3/EFNA3/EFEMP1/EFNB3/MET/EFNA4/TGFBR3/MST1R/FGFR4/EPHB6/NRP2/ERBB4/EGFR/EPHA3	37
MF	GO:0004653	polypeptide N-acetylgalactosaminyltransferase activity	12/4197	20/19443	0.000218519	0.00970847	0.00826428	GALNT14/GALNT15/GALNT3/GALNT18/GALNT6/GALNT1/KCNA6/GALNT12/GALNT11/GALNT17/GALNT7/GALNT13	12
BP, biological processes; CC, cell components; MF, molecular functions; GO, Gene Ontology. BgRatio, Background Ratio.
